# Supplementary material
Source: publisher figshare collection journal article supplement (https://acs.figshare.com/ndownloader/files/4528468)
Supplement: Supplementary file 1 [file 4528468]

## Supporting Information

### Asymmetric aldol reaction of acetaldehyde and isatin derivatives for the synthesis of convolutamydine E, CPC-1, and a 3a-hydroxyfuroindoline part of madindoline A and B

Takahiko Itoh, Hayato Ishikawa, Yujiro Hayashi\*

Department of Industrial Chemistry, Faculty of Engineering, Tokyo University of Science,  
Kagurazaka, Shinjuku-ku, Tokyo 162-8601, Japan

#### General Remarks

All reactions were carried out under argon atmosphere and monitored by thin-layer chromatography using Merck 60 F254 precoated silica gel plates (0.25 mm thickness). FT-IR spectra were recorded on a JASCO FT/IR-410 spectrometer.  $^1\text{H}$  and  $^{13}\text{C}$  NMR spectra were recorded on a Bruker AM400 (400 MHz for  $^1\text{H}$  NMR, 100 MHz for  $^{13}\text{C}$  NMR) instrument. Data for  $^1\text{H}$  NMR are reported as chemical shift ( $\delta$  ppm), coupling constant (Hz), integration, and assignment. Data for  $^{13}\text{C}$  NMR are reported as chemical shift. High-resolution mass spectral analyses (HRMS) were carried out using Bruker ESI-TOF MS. Preparative thin layer chromatography was performed using Wakogel B-5F purchased from Wako Pure Chemical Industries, Tokyo, Japan. Flash chromatography was performed using silica gel 60N of Kanto Chemical Co. Int., Tokyo, Japan. GC-MS was performed on Shimadzu GC-MS QP2010, equipped with a split-mode capillary injection system and electron ionization detectors using Bodman ChiralDEX  $\Gamma$ -TA (30 m  $\times$  0.25 mm). HPLC analysis was performed on a HITACHI Elite LaChrom Series HPLC, UV detection monitored at appropriate wavelength respectively, using Chiralcel OJ-H (0.46 cm  $\times$  25 cm).

#### (2*S*,4*R*)-1-Ethyl 2-methyl 4-hydroxypyrrolidine-1,2-dicarboxylate

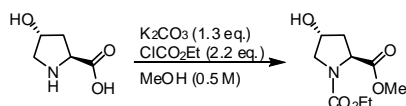

To a solution of (2*S*,4*R*)-4-hydroxypyrrolidine-2-carboxylic acid (15.1 g, 115.7 mmol) and potassium carbonate (20.7 g, 150.4 mmol) in MeOH (230 mL) was added ethyl chloroformate (24.4 mL, 254.5 mmol) at 0 °C. The reaction mixture was stirred for 12 h at room temperature. The resulting mixture was quenched with H<sub>2</sub>O (115 mL) and organic materials were extracted with ethyl acetate three times, and then combined organic extracts were dried over anhydrous Na<sub>2</sub>SO<sub>4</sub>, and concentrated in vacuo after filtration. Purification by column chromatography (ethyl acetate : hexane = 1 : 1) gave (2*S*,4*R*)-1-Ethyl 2-methyl 4-hydroxypyrrolidine-1,2-dicarboxylate (17.5 g, 80.7 mmol) in 70% yield.

NMR spectra data was observed as a mixture of rotamer.

$^1\text{H}$  NMR (CDCl<sub>3</sub>, 400 MHz):  $\delta$  1.15 (1.5H, t,  $J$  = 7.2 Hz), 1.21 (1.5H, t,  $J$  = 7.2 Hz), 1.96–2.06 (1H, m), 2.17–2.31 (1H, m), 2.69 (1H, br-s), 3.41–3.62 (2H, m), 3.68 (1.5H, m), 3.70 (1.5H, m), 3.95–4.15 (2H, m), 4.33–4.45 (2H, m);

$^{13}\text{C}$  NMR (CDCl<sub>3</sub>, 100 MHz):  $\delta$  14.5, 14.6, 38.5, 39.2, 52.2, 52.3, 54.6, 55.1, 57.7, 57.8, 61.5, 61.6, 69.4, 70.1, 154.9, 155.3, 173.2, 173.3;

IR (KBr):  $\nu$  3439, 2984, 2954, 1749, 1682, 1434, 1383, 1350, 1205, 1174 cm<sup>-1</sup>;

HRMS (ESI):  $[M+Na]^+$  calculated for  $[C_9H_{15}NO_5Na]$ : 240.0842, found: 240.0849;  
 $[\alpha]_D^{23} = -75.5$  ( $c$  1.36, MeOH).

**(2*S*,4*R*)-1-Ethyl 2-methyl 4-(tetrahydro-2*H*-pyran-2-yloxy)pyrrolidine-1,2-dicarboxylate**

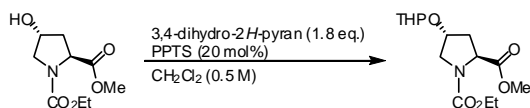

To a solution of (2*S*,4*R*)-1-ethyl 2-methyl 4-hydroxypyrrolidine-1,2-dicarboxylate (17.5 g, 80.7 mmol) and pyridinium *p*-toluenesulfonate (4.0 g, 15.9 mmol) in methylene chloride (167 mL) was added 3,4-dihydro-2*H*-pyran (11.2 mL, 142.6 mmol) at 0 °C. The reaction mixture was stirred for 3 h at room temperature. The resulting mixture was quenched with pH 7.0 phosphate buffer solution and organic materials were extracted with ethyl acetate three times, and then combined organic extracts were dried over anhydrous  $Na_2SO_4$ , and concentrated in vacuo after filtration. Purification by column chromatography (ethyl acetate : hexane = 1 : 2) gave (2*S*,4*R*)-1-ethyl 2-methyl 4-(tetrahydro-2*H*-pyran-2-yloxy)-pyrrolidine-1,2-dicarboxylate (20.2 g, 67.0 mmol) in 83% yield.

NMR spectra data was observed as a mixture of diastereomer and rotamer.

$^1H$  NMR ( $CDCl_3$ , 400 MHz):  $\delta$  1.06 (1.5H, t,  $J = 7.2$  Hz), 1.13 (1.5 H, t,  $J = 7.2$  Hz), 1.32–1.50 (4H, m), 1.52–1.76 (2H, m), 1.88–2.07 (1H, m), 2.11–2.38 (1H, m), 3.33–3.64 (6H, m), 3.66–3.76 (1H, m), 3.86–4.09 (2H, m), 4.20–4.39 (2H, m), 4.48–4.58 (1H, m);

$^{13}C$  NMR ( $CDCl_3$ , 100 MHz):  $\delta$  14.2, 14.3, 18.9, 19.28, 19.34, 25.0, 25.1, 30.33, 30.37, 30.44, 35.1, 35.9, 36.5, 37.4, 38.1, 38.9, 51.2, 51.5, 51.76, 51.82, 51.9, 52.4, 52.7, 54.2, 54.6, 57.3, 57.4, 57.5, 57.6, 57.8, 60.99, 61.06, 61.14, 62.1, 62.2, 62.4, 62.5, 62.6, 68.7, 69.4, 73.1, 74.0, 74.1, 94.2, 97.2, 97.55, 97.63, 97.7, 154.2, 154.4, 154.89, 154.93, 172.8, 172.9, 173.0, 176.2;

IR (KBr):  $\nu$  3461, 2952, 2870, 1756, 1681, 1469, 1442, 1270, 1203, 1122, 1022  $cm^{-1}$ ;

HRMS (ESI):  $[M+Na]^+$  calculated for  $[C_{14}H_{23}NO_6Na]$ : 324.1418, found: 324.1418;

$[\alpha]_D^{23} = -60.2$  ( $c$  1.13, MeOH).

**(2*S*,4*R*)-Ethyl 2-(bis(3,5-bis(trifluoromethyl)phenyl)(hydroxy)methyl)-4-(tetrahydro-2*H*-pyran-2-yloxy)pyrrolidine-1-carboxylate**

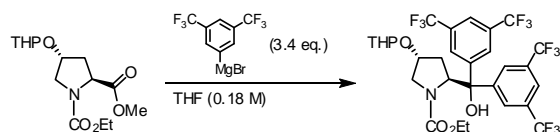

To a solution of (2*S*,4*R*)-1-ethyl 2-methyl 4-(tetrahydro-2*H*-pyran-2-yloxy)-pyrrolidine-1,2-dicarboxylate (7.6 g, 25.2 mmol) in tetrahydrofuran (30 mL) was added (3,5-bis(trifluoromethyl)phenyl) magnesium bromide tetrahydrofuran solution (0.75 M solution, 114 mL) at 0 °C. The reaction mixture was stirred for 4 h at room temperature. The resulting mixture was quenched with aqueous  $NH_4Cl$  solution and organic materials were extracted with ethyl acetate three times, and then combined organic extracts were dried over anhydrous  $Na_2SO_4$ , and concentrated in vacuo after filtration. Purification by column chromatography (ethyl acetate : hexane = 1 : 2) gave (2*S*,4*R*)-ethyl 2-(bis(3,5-bis(trifluoromethyl)phenyl)(hydroxy)methyl)-4-(tetrahydro-2*H*-pyran-2-yloxy)pyrrolidine-1-carboxylate (16.2 g, 23.0 mmol) in 92% yield.

NMR spectra data was observed as a mixture of diastereomer and rotamer.

$^1\text{H}$  NMR ( $\text{CDCl}_3$ , 400 MHz):  $\delta$  1.10–1.38 (3H, m), 1.14–1.58 (3H, m), 1.60–1.80 (4H, m), 1.84–1.95 (1H, m), 1.96–2.20 (1H, m), 3.36–3.46 (1H, m), 3.68–3.97 (3H, m), 3.98–4.17 (2H, m), 4.42–4.51 (1H, m), 4.92–5.06 (1H, m), 7.81–7.85 (3H, m), 7.87–7.93 (3H, m);

IR (KBr):  $\nu$  2954, 2875, 1735, 1513, 1451, 1247, 1144, 1109, 1005, 736  $\text{cm}^{-1}$ ;

HRMS (ESI):  $[\text{M}+\text{Na}]^+$  calculated for  $[\text{C}_{29}\text{H}_{27}\text{NO}_5\text{F}_{12}\text{Na}]$ : 720.1590, found: 720.1566;

$[\alpha]_{\text{D}}^{23} = +48.3$  ( $c$  1.72, MeOH).

**(2*S*,4*R*)-Ethyl 2-(bis(3,5-bis(trifluoromethyl)phenyl)(hydroxy)methyl)-4-hydroxypyrrolidine-1-carboxylate**

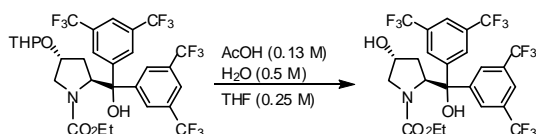

To a solution of (2*S*,4*R*)-ethyl 2-(bis(3,5-bis(trifluoromethyl)phenyl)(hydroxy)methyl)-4-(tetrahydro-2*H*-pyran-2-yloxy)pyrrolidine-1-carboxylate (17.7 g, 25.2 mmol) in tetrahydrofuran (95 mL) and  $\text{H}_2\text{O}$  (47 mL) was added acetic acid (188 mL, 197.4 mmol) at room temperature. The reaction mixture was stirred for 3 h at 60  $^{\circ}\text{C}$ . The resulting mixture was quenched with pH 7.0 phosphate buffer solution and organic materials were extracted with ethyl acetate three times, and then combined organic extracts were dried over anhydrous  $\text{Na}_2\text{SO}_4$ , and concentrated in vacuo after filtration. Purification by column chromatography (ethyl acetate : hexane = 1 : 1) gave (2*S*,4*R*)-ethyl 2-(bis(3,5-bis(trifluoromethyl)phenyl)(hydroxy)methyl)-4-hydroxypyrrolidine-1-carboxylate (14.5 g, 23.4 mmol) in 93% yield.

$^1\text{H}$  NMR ( $\text{CDCl}_3$ , 400 MHz):  $\delta$  1.13 (3H, t,  $J$  = 6.8 Hz), 1.77–1.88 (1H, m), 1.90–1.99 (2H, m), 3.04 (1H, dd,  $J$  = 4.0, 12.8 Hz), 3.70–3.77 (1H, m), 3.91–4.14 (3H, m), 4.15–4.20 (1H, m), 5.04 (1H, t,  $J$  = 8.4 Hz), 7.81–7.87 (3H, m), 7.88–7.94 (3H, m);

$^{13}\text{C}$  NMR ( $\text{CDCl}_3$ , 100 MHz):  $\delta$  14.6, 39.6, 56.7, 62.8, 67.4, 69.0, 80.3, 107.9 (4C), 121.7 (4C), 131.4 (4C), 144.9 (2C), 146.5 (2C), 158.4;

IR (KBr):  $\nu$  3393, 2987, 1675, 1429, 1372, 1348, 1279, 1173, 1134, 682  $\text{cm}^{-1}$ ;

HRMS (ESI):  $[\text{M}+\text{Na}]^+$  calculated for  $[\text{C}_{24}\text{H}_{19}\text{NO}_4\text{F}_{12}\text{Na}]$ : 636.1015, found: 636.1020;

$[\alpha]_{\text{D}}^{22} = +54.5$  ( $c$  1.49, MeOH).

**(3*R*,5*S*)-5-(Bis(3,5-bis(trifluoromethyl)phenyl)(hydroxy)methyl)pyrrolidin-3-ol (6)**

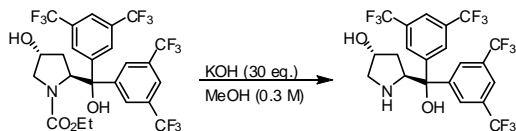

To a solution of (2*S*,4*R*)-ethyl 2-(bis(3,5-bis(trifluoromethyl)phenyl)(hydroxy)methyl)-4-hydroxypyrrolidine-1-carboxylate (10.7 g, 17.3 mmol) in MeOH (57 mL) was added potassium hydroxide (29.0 g, 519 mmol) at room temperature. The reaction mixture was stirred for 3 h at 90  $^{\circ}\text{C}$ . The resulting mixture was quenched with pH 7.0 phosphate buffer solution and organic materials were extracted with ethyl acetate three times, and then combined organic extracts were dried over anhydrous  $\text{Na}_2\text{SO}_4$ , and concentrated in vacuo after filtration. Purification by column chromatography (ethyl acetate : hexane = 1 : 1) gave (3*R*,5*S*)-5-(bis(3,5-bis(trifluoromethyl)phenyl)(hydroxy)methyl)pyrrolidin-3-ol (7.1 g, 13.1 mmol) in 88% yield.

$^1\text{H}$  NMR ( $\text{CDCl}_3$ , 400 MHz):  $\delta$  1.42–1.51 (1H, m), 1.68–1.78 (1H, m), 3.08 (1H, dd,  $J = 1.6, 10.0$  Hz), 3.17 (1H, dd,  $J = 4.0, 12.0$  Hz), 4.41–4.46 (1H, m), 4.72 (1H, dd,  $J = 6.0, 10.0$  Hz), 7.77 (2H, d,  $J = 10.8$  Hz), 7.94 (2H, s), 8.11 (2H, s);  
 $^{13}\text{C}$  NMR ( $\text{CD}_3\text{OD}$ , 100 MHz):  $\delta$  37.1, 56.3, 64.6, 73.0, 78.7, 122.2, 123.4, 126.1, 127.5 (2C), 128.2 (2C), 128.9, 132.8 (2C, d,  $J = 4.0$  Hz), 133.1 (2C, d,  $J = 4.0$  Hz), 149.3 (2C), 150.2 (2C);  
 IR (KBr):  $\nu$  3365, 1372, 1278, 1174, 1131, 902, 844, 711, 682  $\text{cm}^{-1}$ ;  
 HRMS (ESI):  $[\text{M}+\text{H}]^+$  calculated for  $[\text{C}_{21}\text{H}_{16}\text{NO}_2\text{F}_{12}]$ : 542.0984, found: 542.0984;  
 $[\alpha]_{\text{D}}^{23} = +27.7$  ( $c$  1.64, MeOH).

### 1-Benzylindoline-2,3-dione (7a)

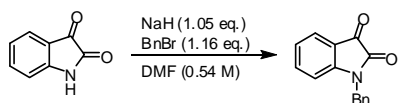

A solution of isatin (5.0 g, 34 mmol) in DMF (62 mL) was cooled to 0 °C (ice bath). NaH (60% dispersion in mineral oil, 1.4 g, 36 mmol) was added portionwise to the orange solution. The color of solution changed to deep purple. When the gas evolution stopped, benzyl bromide (6.7 g, 39 mmol) was added slowly, whereupon the mixture turned red-brown. After the reaction mixture was stirred for 15 min at room temperature,  $\text{H}_2\text{O}$  (300 mL) was introduced to precipitate the product. After filtration, the product was washed with hexane to afford 1-benzylindoline-2,3-dione (7.6 g, 95%) after drying.

$^1\text{H}$  NMR ( $\text{CDCl}_3$ , 400 MHz):  $\delta$  4.85 (2H, s), 6.70 (1H, d,  $J = 8.0$  Hz), 7.01 (1H, dt,  $J = 0.4, 7.2$  Hz), 7.19–7.31 (5H, m), 7.40 (1H, dt,  $J = 1.2, 8.0$  Hz), 7.53 (1H, dd,  $J = 0.4, 7.2$  Hz);  
 $^{13}\text{C}$  NMR ( $\text{CDCl}_3$ , 100 MHz):  $\delta$  44.1, 111.0, 117.7, 123.9, 125.4, 127.4 (2C), 128.2, 129.1 (2C), 134.5, 138.3, 150.8, 158.3, 183.2;  
 IR (KBr):  $\nu$  1731, 1613, 1471, 1349, 1177, 1078, 1004, 766, 754, 694  $\text{cm}^{-1}$ ;  
 HRMS (ESI):  $[\text{M}+\text{Na}]^+$  calculated for  $[\text{C}_{15}\text{H}_{11}\text{NO}_2\text{Na}]$ : 260.0682, found: 260.0681;

### (R)-1-Benzyl-3-hydroxy-3-(2-hydroxyethyl)indolin-2-one (8a) (Table 1, entry 13)

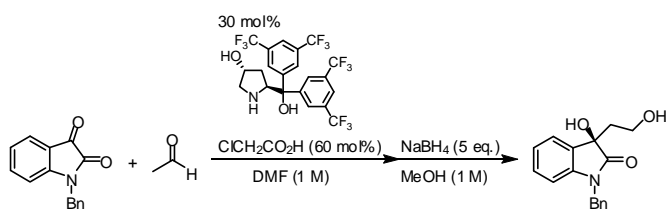

To a solution of (2*S*,4*R*)-4-hydroxy-2-(bis-[3,5-bis(trifluoromethyl)phenyl]hydroxymethyl)pyrrolidine (48 mg, 0.090 mmol), chloroacetic acid (17 mg) and 1-benzylindoline-2,3-dione (71 mg, 0.30 mmol) in DMF (0.30 mL) was added acetaldehyde (84  $\mu\text{L}$ , 1.50 mmol) in the sealed tube (ACE GLASS, product number 5027-05) at 4 °C. After the reaction mixture was stirred for 48 h at 4 °C, MeOH (0.5 mL) and  $\text{NaBH}_4$  (56 mg, 1.5 mmol) were added, and the mixture was stirred for 1 h at –20 °C. The resulting mixture was quenched with pH 7.0 phosphate buffer solution and the organic materials were extracted with ethyl acetate three times, and then combined organic extracts were dried over anhydrous  $\text{Na}_2\text{SO}_4$ , and concentrated in vacuo after filtration. Purification by preparative thin layer chromatography (ethyl acetate : hexane = 1:1) gave (*R*)-1-benzyl-3-hydroxy-3-(2-hydroxyethyl)indolin-2-one (47 mg, 0.17 mmol) in 55% yield with 86% ee.

$^1\text{H}$  NMR ( $\text{CDCl}_3$ , 400 MHz):  $\delta$  2.01–2.10 (1H, m), 2.23–2.32 (1H, m), 3.90–4.01 (2H, m), 4.75 (1H, d,  $J$  = 15.6 Hz), 4.94 (1H, d,  $J$  = 15.6 Hz), 6.68 (1H, d,  $J$  = 8.0 Hz), 7.04 (1H, t,  $J$  = 7.6 Hz), 7.17 (1H, dt,  $J$  = 1.2, 7.6 Hz), 7.20–7.31 (5H, m), 7.38 (1H, dd,  $J$  = 0.8, 8.0 Hz);

$^{13}\text{C}$  NMR ( $\text{CDCl}_3$ , 100 MHz):  $\delta$  39.4, 43.9, 58.6, 76.1, 109.6, 123.3, 123.9, 127.2 (2C), 127.8, 128.9 (2C), 129.7, 130.7, 135.4, 142.0, 178.5;

IR (KBr):  $\nu$  3393, 2946, 1705, 1614, 1489, 1468, 1368, 1174, 1080, 753  $\text{cm}^{-1}$ ;

HRMS (ESI):  $[\text{M}+\text{Na}]^+$  calculated for  $[\text{C}_{17}\text{H}_{17}\text{NO}_3\text{Na}]$ : 306.1101, found: 306.1106;

$[\alpha]_{\text{D}}^{22} = +23.4$  ( $c$  0.95, MeOH).

Enantiometric excess was determined by HPLC with a Chiralcel OJ-H column (hexane : 2-propanol = 10 : 1,  $\lambda$  = 254 nm), 1.0 mL / min; major enantiomer  $t_{\text{R}}$  = 24.3 min, minor enantiomer  $t_{\text{R}}$  = 19.3 min.

### **1-(4-Methoxybenzyl)indoline-2,3-dione (7c)**

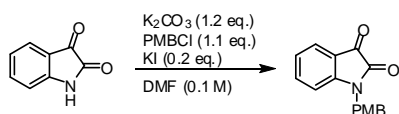

A solution of isatin (10.2 g, 69 mmol) in DMF (690 mL) was cooled to 0 °C (ice bath). Potassium carbonate (11.5 g, 83 mmol) and potassium iodide (2.3 g, 13.9 mmol) were added to the orange solution. The color of solution changed to deep purple. When the gas evolution stopped, *p*-methoxybenzyl chloride (11.2 mL, 76 mmol) was added slowly. The reaction mixture was stirred for 3 h at 110 °C. The reaction was quenched with aqueous 1N-HCl and organic materials were extracted with ethyl acetate three times, and then combined organic extracts were dried over anhydrous  $\text{Na}_2\text{SO}_4$ , and concentrated in vacuo after filtration. The product was washed with hexane to afford 1-(4-methoxybenzyl)indoline-2,3-dione (17.5 g, 96%) after drying.

$^1\text{H}$  NMR ( $\text{CDCl}_3$ , 400 MHz):  $\delta$  3.77 (3H, s), 4.85 (2H, s), 6.79 (1H, d,  $J$  = 8.0 Hz), 6.82–6.88 (2H, m), 7.06 (1H, dt,  $J$  = 0.4, 7.6 Hz), 7.22–7.29 (2H, m), 7.47 (1H, dt,  $J$  = 1.2, 7.6 Hz), 7.57 (1H, dd,  $J$  = 0.8, 6.8 Hz);

$^{13}\text{C}$  NMR ( $\text{CDCl}_3$ , 100 MHz):  $\delta$  43.6, 55.3, 111.0, 114.4 (2C), 117.7, 123.8, 125.4, 126.5, 128.9 (2C), 138.3, 150.8, 158.3, 159.5, 183.4;

IR (KBr):  $\nu$  1735, 1610, 1513, 1467, 1353, 1248, 1182, 1021, 856, 762  $\text{cm}^{-1}$ ;

HRMS (ESI):  $[\text{M}+\text{Na}]^+$  calculated for  $[\text{C}_{16}\text{H}_{13}\text{NO}_3\text{Na}]$ : 290.0788, found: 290.0782;

### **(R)-3-Hydroxy-3-(2-hydroxyethyl)-1-(4-methoxybenzyl)indolin-2-one (8c)**

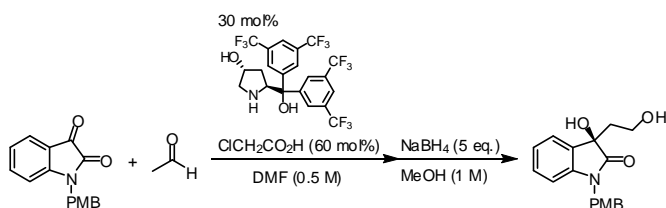

To a solution of (2*S*,4*R*)-4-hydroxy-2-(bis-[3,5-bis(trifluoromethyl)phenyl]hydroxymethyl)pyrrolidine (48 mg, 0.090 mmol), chloroacetic acid (17 mg) and 1-(4-methoxybenzyl)indoline-2,3-dione (80 mg, 0.30 mmol) in DMF (0.60 mL) was added acetaldehyde (84  $\mu\text{L}$ , 1.50 mmol) in the sealed tube (ACE GLASS, product number 5027-05) at 4 °C. After the reaction mixture was stirred for 48 h at 4 °C, MeOH (0.5 mL) and  $\text{NaBH}_4$  (56 mg, 1.5 mmol) were added, and the reaction mixture was stirred for 1 h at –20 °C. The

resulting mixture was quenched with pH 7.0 phosphate buffer solution and organic materials were extracted with ethyl acetate three times, and then combined organic extracts were dried over anhydrous Na<sub>2</sub>SO<sub>4</sub>, and concentrated in vacuo after filtration. Purification by preparative thin layer chromatography (ethyl acetate : hexane = 1:1) gave (*R*)-3-hydroxy-3-(2-hydroxyethyl)-1-(4-methoxybenzyl)indolin-2-one (68 mg, 0.22 mmol) in 73% yield with 86% ee.

<sup>1</sup>H NMR (CDCl<sub>3</sub>, 400 MHz): δ 2.03–2.12 (1H, m), 2.23–2.32 (1H, m), 3.75 (3H, s), 3.92–3.99 (2H, m), 4.71 (1H, d, *J* = 15.2 Hz), 4.88 (1H, d, *J* = 15.2 Hz), 6.73 (1H, d, *J* = 4.8 Hz), 6.79–6.86 (2H, m), 7.05 (1H, dt, *J* = 0.8, 7.6 Hz), 7.20 (3H, dt, *J* = 0.6, 7.6 Hz), 7.39 (1H, dd, *J* = 0.8, 7.2 Hz);

<sup>13</sup>C NMR (CDCl<sub>3</sub>, 100 MHz): δ 39.5, 43.3, 55.3, 58.6, 76.1, 109.7, 114.2 (2C), 123.7, 123.9, 127.5, 128.6 (2C), 129.6, 130.7, 142.0, 159.2, 178.5;

IR (KBr): ν 3395, 1704, 1614, 1513, 1468, 1367, 1249, 1176, 1033, 751 cm<sup>-1</sup>;

HRMS (ESI): [M+Na]<sup>+</sup> calculated for [C<sub>18</sub>H<sub>19</sub>NO<sub>4</sub>Na]: 336.1206, found: 336.1206;

[α]<sub>D</sub><sup>22</sup> = +21.5 (*c* 1.53, MeOH).

Enantiometric excess was determined by HPLC with a Chiralcel OJ-H column (hexane : 2-propanol = 10 : 1, λ = 254 nm), 1.0 mL / min; major enantiomer *t*<sub>R</sub> = 29.7 min, minor enantiomer *t*<sub>R</sub> = 27.9 min.

#### **1-(Methoxymethyl)indoline-2,3-dione (7d)**

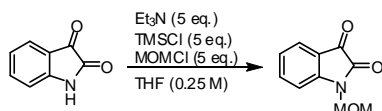

A solution of isatin (1.0 g, 6.8 mmol) in THF (27 mL) was cooled to 0 °C (ice bath). Triethylamine (4.7 mL, 34 mmol) and trimethylsilyl chloride (4.3 mL, 34 mmol) were added to the orange solution. The reaction mixture was stirred for 2 h at 80 °C. After cooled the reaction mixture to 0 °C, chloro(methoxy)methane (3.0 mL, 34 mmol) was added slowly. The reaction mixture was stirred for 6 h at 80 °C, then the resulting mixture was quenched with pH 7.0 phosphate buffer solution. Organic materials were extracted with ethyl acetate three times, and then combined organic extracts were dried over anhydrous Na<sub>2</sub>SO<sub>4</sub>, and concentrated in vacuo after filtration. Purification by column chromatography (ethyl acetate : hexane = 1 : 9) gave 1-(methoxymethyl)indoline-2,3-dione (694 mg, 3.6 mmol) in 53% yield.

<sup>1</sup>H NMR (CDCl<sub>3</sub>, 400 MHz): δ 3.37 (3H, s), 5.15 (2H, s), 7.11 (1H, d, *J* = 8.0 Hz), 7.18 (1H, dt, *J* = 0.8, 8.0 Hz), 7.58–7.67 (2H, m);

<sup>13</sup>C NMR (CDCl<sub>3</sub>, 100 MHz): δ 56.6, 71.7, 111.6, 117.5, 124.3, 125.4, 138.6, 150.1, 158.4, 182.8;

IR (KBr): ν 2944, 1726, 1605, 1467, 1346, 1287, 1183, 1076, 910, 755 cm<sup>-1</sup>;

HRMS (ESI): [M+Na]<sup>+</sup> calculated for [C<sub>10</sub>H<sub>9</sub>NO<sub>3</sub>Na]: 214.0475, found: 214.0480;

**(R)-3-Hydroxy-3-(2-hydroxyethyl)-1-(methoxymethyl)indolin-2-one (8d)**

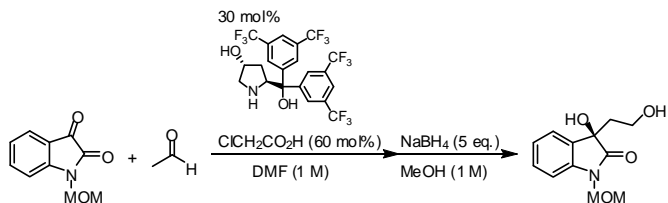

To a solution of (2*S*,4*R*)-4-hydroxy-2-(bis-[3,5-bis(trifluoromethyl)phenyl]hydroxymethyl)pyrrolidine (48 mg, 0.090 mmol), chloroacetic acid (17 mg) and 1-(methoxymethyl)indoline-2,3-dione (58 mg, 0.30 mmol) in DMF (60 mL) was added acetaldehyde (84  $\mu$ L, 1.50 mmol) in the sealed tube (ACE GLASS, product number 5027-05) at 4 °C. After the reaction mixture was stirred for 48 h at 4 °C, MeOH (0.5 mL) and NaBH<sub>4</sub> (56 mg, 1.5 mmol) were added, and the reaction mixture was stirred for 1 h at –20 °C. The resulting mixture was quenched with pH 7.0 phosphate buffer solution and organic materials were extracted with ethyl acetate three times, and then combined organic extracts were dried over anhydrous Na<sub>2</sub>SO<sub>4</sub>, and concentrated in vacuo after filtration. Purification by preparative thin layer chromatography (ethyl acetate : hexane = 1:1) gave (*R*)-3-Hydroxy-3-(2-hydroxyethyl)-1-(methoxymethyl)indolin-2-one (52 mg, 0.22 mmol) in 72% yield with 86% ee.

<sup>1</sup>H NMR (CDCl<sub>3</sub>, 400 MHz):  $\delta$  2.01–2.09 (1H, m), 2.25–2.35 (1H, m), 3.34 (3H, s), 3.90–4.03 (2H, m), 5.05 (1H, d, *J* = 14.0 Hz), 5.13 (1H, d, *J* = 14.0 Hz), 7.03 (1H, d, *J* = 6.8 Hz), 7.14 (1H, dt, *J* = 0.8, 8.4 Hz), 7.32 (1H, dt, *J* = 0.8, 8.4 Hz), 7.41 (1H, dd, *J* = 0.8, 6.8 Hz);

<sup>13</sup>C NMR (CDCl<sub>3</sub>, 100 MHz):  $\delta$  39.4, 56.4, 58.6, 71.6, 76.3, 110.0, 123.8, 124.0, 129.9, 130.0, 141.2, 178.8;

IR (KBr):  $\nu$  3399, 1718, 1614, 1487, 1468, 1350, 1182, 1094, 913, 755 cm<sup>–1</sup>;

HRMS (ESI): [M+Na]<sup>+</sup> calculated for [C<sub>12</sub>H<sub>15</sub>NO<sub>4</sub>Na]: 260.0893, found: 260.0891;

[ $\alpha$ ]<sub>D</sub><sup>22</sup> = +12.5 (*c* 0.44, MeOH).

Enantiometric excess was determined by HPLC with a Chiralcel OJ-H column (hexane : 2-propanol = 30 : 1,  $\lambda$  = 215 nm), 1.0 mL / min; major enantiomer *t*<sub>R</sub> = 49.1 min, minor enantiomer *t*<sub>R</sub> = 53.2 min.

**1-[(Triisopropylsilyloxy)methyl]indoline-2,3-dione (7e)**

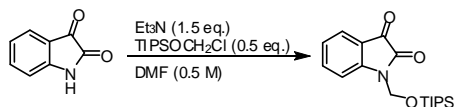

A solution of isatin (7.3 g, 49.8 mmol) in DMF (100 mL) was cooled to 0 °C (ice bath). Triethylamine (10.4 mL, 75 mmol) and (chloromethoxy)triisopropylsilane (5.6 g, 24.9 mmol) was added to the orange solution. The reaction mixture was stirred for 24 h at room temperature, then the resulting mixture was quenched with pH 7.0 phosphate buffer solution. Organic materials were extracted with ethyl acetate three times, and then combined organic extracts were dried over anhydrous Na<sub>2</sub>SO<sub>4</sub>, and concentrated in vacuo after filtration. Purification by column chromatography (ethyl acetate : hexane = 1 : 10) gave 1-[(triisopropylsilyloxy)methyl]indoline-2,3-dione (2.1 g, 6.3 mmol) in 25% yield.

<sup>1</sup>H NMR (CDCl<sub>3</sub>, 400 MHz):  $\delta$  1.06 (18H, d, *J* = 6.8 Hz), 1.12–1.22 (3H, m), 5.41 (2H, s), 7.12–7.19 (2H, m), 7.62 (2H, dt, *J* = 1.6, 7.6 Hz);

<sup>13</sup>C NMR (CDCl<sub>3</sub>, 100 MHz):  $\delta$  11.9 (3C), 17.7 (6C), 64.8, 111.8, 117.5, 124.0, 125.3, 138.4, 150.5,

157.2, 183.3;

IR (KBr):  $\nu$  2941, 2865, 1746, 1600, 1452, 1311, 1274, 1226, 1159, 1092,  $\text{cm}^{-1}$ ;

HRMS (ESI):  $[\text{M}+\text{Na}]^+$  calculated for  $[\text{C}_{18}\text{H}_{27}\text{NO}_3\text{SiNa}]$ : 356.1652, found: 356.1660;

**(R)-3-Hydroxy-3-(2-hydroxyethyl)-1-((triisopropylsilyloxy)methyl)indolin-2-one (8e)**

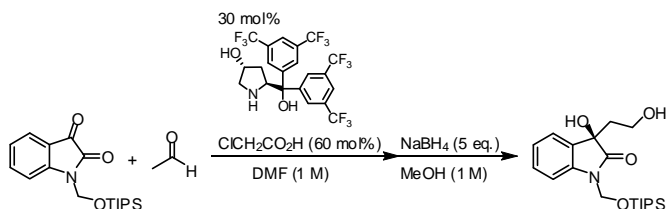

To a solution of (2*S*,4*R*)-4-hydroxy-2-(bis-[3,5-bis(trifluoromethyl)phenyl]hydroxymethyl)pyrrolidine (71 mg, 0.13 mmol), chloroacetic acid (25 mg, 0.26) and 1-[(triisopropylsilyloxy)methyl]indoline-2,3-dione (146 mg, 0.44 mmol) in DMF (0.44 mL) was added acetaldehyde (123  $\mu\text{L}$ , 2.2 mmol) in the sealed tube (ACE GLASS, product number 5027-05) at 4  $^{\circ}\text{C}$ . After the reaction mixture was stirred for 72 h at 4  $^{\circ}\text{C}$ , MeOH (0.5 mL) and  $\text{NaBH}_4$  (82 mg, 2.2 mmol) were added, and the reaction mixture was stirred for 1 h at  $-20^{\circ}\text{C}$ . The resulting mixture was quenched with pH 7.0 phosphate buffer solution and organic materials were extracted with ethyl acetate three times, and then combined organic extracts were dried over anhydrous  $\text{Na}_2\text{SO}_4$ , and concentrated in vacuo after filtration. Purification by preparative thin layer chromatography (ethyl acetate : hexane = 1:1) gave (*R*)-3-hydroxy-3-(2-hydroxyethyl)-1-((triisopropylsilyloxy)methyl)indolin-2-one (121 mg, 0.31 mmol) in 73% yield with 85% ee.

$^1\text{H}$  NMR ( $\text{CDCl}_3$ , 400 MHz):  $\delta$  1.06 (18H, d,  $J$  = 8.8 Hz), 1.11–1.22 (3H, m), 1.94–2.04 (1H, m), 2.22–2.32 (1H, m), 2.60–2.75 (1H, m), 3.90–4.08 (3H, m), 5.30 (1H, d,  $J$  = 7.6 Hz), 5.42 (1H, d,  $J$  = 7.6 Hz), 7.09 (1H, d,  $J$  = 11.6 Hz), 7.13 (1H, dt,  $J$  = 0.8, 7.6 Hz), 7.33 (1H, dt,  $J$  = 0.8, 7.6 Hz), 7.41 (1H, dd,  $J$  = 11.6 Hz);

$^{13}\text{C}$  NMR ( $\text{CDCl}_3$ , 100 MHz):  $\delta$  11.9 (3C), 17.8 (6C), 39.2, 58.6, 64.9, 76.4, 110.3, 123.4, 123.7, 129.7, 130.2, 141.4, 177.3;

IR (KBr):  $\nu$  3392, 2944, 2866, 1718, 1615, 1469, 1364, 1279, 1092, 751  $\text{cm}^{-1}$ ;

HRMS (ESI):  $[\text{M}+\text{Na}]^+$  calculated for  $[\text{C}_{20}\text{H}_{33}\text{NO}_4\text{SiNa}]$ : 402.2071, found: 402.2078;

$[\alpha]_{\text{D}}^{20} = +12.8$  ( $c$  0.78, MeOH).

Enantiometric excess was determined by HPLC with a Chiralcel OJ-H column (hexane : 2-propanol = 10 : 1,  $\lambda$  = 254 nm), 1.0 mL / min; major enantiomer  $t_{\text{R}}$  = 13.1 min, minor enantiomer  $t_{\text{R}}$  = 13.7 min.

**(R)-3-Hydroxy-3-(2-hydroxyethyl)indolin-2-one (14)**

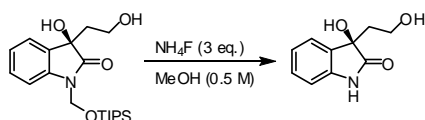

To a solution of (*R*)-3-hydroxy-3-(2-hydroxyethyl)-1-((triisopropylsilyloxy)methyl)indolin-2-one (498 mg, 1.3 mmol) in MeOH (2.6 mL) was added ammonium fluoride (147 mg, 3.9 mmol) at room temperature. The reaction mixture was stirred for 12 h at 70  $^{\circ}\text{C}$ . After that reaction mixture was concentrated in vacuo, purification by preparative thin layer chromatography (ethyl acetate) gave (*R*)-3-hydroxy-3-(2-hydroxyethyl)indolin-2-one (225 mg, 1.2 mmol) in 88% yield.



$^1\text{H}$  NMR ( $\text{CDCl}_3$ , 400 MHz):  $\delta$  2.00–2.09 (1H, m), 2.22–2.31 (1H, m), 3.90–4.03 (2H, m), 6.86 (1H, d,  $J$  = 7.6 Hz), 7.08 (1H, t,  $J$  = 7.6 Hz), 7.25 (1H, dt,  $J$  = 0.8, 7.6 Hz), 7.38 (1H, d,  $J$  = 7.6 Hz), 7.93 (1H, br-s);

$^{13}\text{C}$  NMR ( $\text{CDCl}_3$ , 100 MHz):  $\delta$  39.2, 58.6, 76.3, 110.3, 123.3, 124.3, 129.8, 131.0, 139.9, 180.2;

IR (KBr):  $\nu$  3284, 2923, 1358, 1715, 1621, 1471, 1279, 1178, 753, 584  $\text{cm}^{-1}$ ;

HRMS (ESI):  $[\text{M}+\text{Na}]^+$  calculated for  $[\text{C}_{10}\text{H}_{11}\text{NO}_3\text{Na}]$ : 216.0631, found: 216.0631;

$[\alpha]_{\text{D}}^{20}$  = +21.6 ( $c$  0.23, MeOH).

#### **(3a*R*,8a*S*)-3,3a,8,8a-Tetrahydro-2*H*-furo[2,3-*b*]indol-3a-ol (15)**

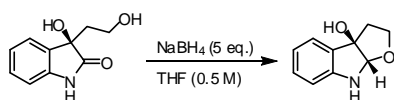

To a solution of (*R*)-3-hydroxy-3-(2-hydroxyethyl)indolin-2-one (118 mg, 0.61 mmol) in tetrahydrofuran (1.2 mL) was added  $\text{NaBH}_4$  (116 mg, 3.1 mmol) at 0 °C. The reaction mixture was stirred for 48 h at room temperature. The resulting mixture was quenched with pH 7.0 phosphate buffer solution and organic materials were extracted with ethyl acetate three times, and then combined organic extracts were dried over anhydrous  $\text{Na}_2\text{SO}_4$ , and concentrated in vacuo after filtration. Purification by preparative thin layer chromatography (ethyl acetate : hexane = 1:1) gave (3a*R*,8a*S*)-3,3a,8,8a-tetrahydro-2*H*-furo[2,3-*b*]indol-3a-ol (51 mg, 0.28 mmol) in 47% yield.

$^1\text{H}$  NMR ( $\text{CDCl}_3$ , 400 MHz):  $\delta$  2.36 (1H, ddd,  $J$  = 2.2, 5.4, 12.0 Hz), 2.48 (1H, ddd,  $J$  = 7.6, 11.0, 12.0 Hz), 3.69 (1H, ddd,  $J$  = 5.4, 9.0, 11.0 Hz), 4.08 (1H, ddd,  $J$  = 2.2, 7.6, 9.0 Hz), 4.57 (1H, br-s), 5.41 (1H, s), 6.62 (1H, d,  $J$  = 7.6 Hz), 6.82 (1H, t,  $J$  = 7.6 Hz), 7.18 (1H, dt,  $J$  = 1.2, 7.6 Hz), 7.33 (1H, dt,  $J$  = 1.5, 7.6 Hz);

$^{13}\text{C}$  NMR ( $\text{CDCl}_3$ , 100 MHz):  $\delta$  40.9, 67.4, 89.5, 99.4, 109.5, 119.5, 124.1, 130.1, 130.3, 149.6;

IR (KBr):  $\nu$  3382, 2952, 2873, 1668, 1613, 1471, 1313, 1111, 1021, 949, 747  $\text{cm}^{-1}$ ;

HRMS (ESI):  $[\text{M}+\text{Na}]^+$  calculated for  $[\text{C}_{10}\text{H}_{11}\text{NO}_2\text{Na}]$ : 200.0682, found: 200.0681;

$[\alpha]_{\text{D}}^{22}$  = -114.8 ( $c$  0.77,  $\text{CHCl}_3$ );

lit.<sup>S1)</sup>  $[\alpha]_{\text{D}}$  = -144 ( $c$  0.84,  $\text{CHCl}_3$ ).

#### **5,7-Dibromo-1-((triisopropylsilyloxy)methyl)indoline-2,3-dione (9)**

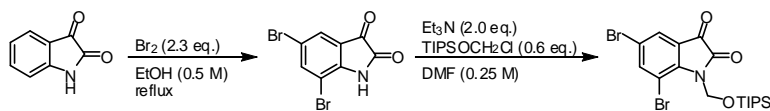

5,7-Dibromoindoline-2,3-dione was prepared by known method<sup>S2)</sup>. A solution of 5,7-dibromoindoline-2,3-dione (9.9 g, 32.5 mmol) in DMF (130 mL) was cooled to 0 °C (ice bath). Triethylamine (9.0 mL, 65 mmol) and (chloromethoxy)triisopropylsilane (4.8 g, 21.6 mmol) were added to the orange solution. The reaction mixture was stirred for 24 h at room temperature, then the resulting mixture was quenched with pH 7.0 phosphate buffer solution. Organic materials were extracted with ethyl acetate three times, and then combined organic extracts were dried over anhydrous  $\text{Na}_2\text{SO}_4$ , and concentrated in vacuo after filtration. Purification by column chromatography (ethyl acetate : hexane = 1 : 10) gave 5,7-dibromo-1-((triisopropylsilyloxy)methyl)indoline-2,3-dione (4.5 g, 9.1 mmol) in 42% yield.

$^1\text{H}$  NMR ( $\text{CDCl}_3$ , 400 MHz):  $\delta$  1.02–1.08 (18H, m), 1.10–1.22 (3H, m), 5.73 (2H, s), 7.72 (1H, d,  $J = 2.0$  Hz), 7.91 (1H, d,  $J = 2.0$  Hz);

$^{13}\text{C}$  NMR ( $\text{CDCl}_3$ , 100 MHz):  $\delta$  11.2 (3C), 17.1 (6C), 63.7, 105.3, 116.4, 120.6, 126.5, 144.4, 145.9, 156.8, 180.6;

IR (KBr):  $\nu$  2941, 2468, 1746, 1600, 1452, 1313, 1274, 1227, 1160, 1092  $\text{cm}^{-1}$ ;

HRMS (ESI):  $[\text{M}+\text{Na}]^+$  calculated for  $[\text{C}_{18}\text{H}_{25}\text{Br}_2\text{NO}_3\text{SiNa}]$ : 513.9843, found: 513.9864;

### **(R)-5,7-Dibromo-3-hydroxy-3-(2-hydroxyethyl)-1-((triisopropylsilyloxy)methyl)indolin-2-one (11)**

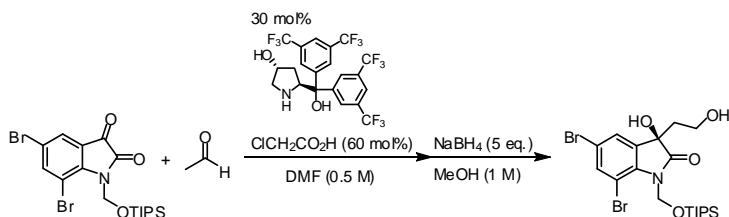

To a solution of (2*S*,4*R*)-4-hydroxy-2-(bis-[3,5-bis(trifluoromethyl)phenyl]hydroxymethyl)pyrrolidine (71 mg, 0.13 mmol), chloroacetic acid (25 mg, 0.26) and 5,7-dibromo-1-((triisopropylsilyloxy)methyl)indoline-2,3-dione (220 mg, 0.44 mmol) in DMF (0.89 mL) was added acetaldehyde (123  $\mu\text{L}$ , 2.2 mmol) in the sealed tube (ACE GLASS, product number 5027-05) at 4  $^\circ\text{C}$ . After the reaction mixture was stirred for 48 h at 4  $^\circ\text{C}$ , MeOH (0.5 mL) and  $\text{NaBH}_4$  (82 mg, 2.2 mmol) were added, and the reaction mixture was stirred for 1 h at  $-20$   $^\circ\text{C}$ . The resulting mixture was quenched with pH 7.0 phosphate buffer solution and organic materials were extracted with ethyl acetate three times, and then combined organic extracts were dried over anhydrous  $\text{Na}_2\text{SO}_4$ , and concentrated in vacuo after filtration. Purification by preparative thin layer chromatography (ethyl acetate : hexane = 1:1) gave (R)-5,7-Dibromo-3-hydroxy-3-(2-hydroxyethyl)-1-((triisopropylsilyloxy)methyl)indolin-2-one (200 mg, 0.83 mmol) in 83% yield with 81% ee.

$^1\text{H}$  NMR ( $\text{CDCl}_3$ , 400 MHz):  $\delta$  1.06 (18H, dd,  $J = 2.0, 9.2$  Hz), 1.10–1.20 (3H, m), 1.89 (1H, ddd,  $J = 4.0, 4.8, 15.2$  Hz), 2.27 (1H, ddd,  $J = 4.8, 9.2, 15.2$  Hz), 3.85–3.96 (1H, m), 4.06–4.18 (1H, m), 5.66 (2H, s), 7.46 (1H, d,  $J = 2.0$  Hz), 7.63 (1H, d,  $J = 2.0$  Hz);

$^{13}\text{C}$  NMR ( $\text{CDCl}_3$ , 100 MHz):  $\delta$  11.8 (3C), 17.8 (6C), 36.4, 58.3, 65.1, 77.5, 113.1, 119.8, 123.8, 126.9, 129.7, 144.4, 176.3;

IR (KBr):  $\nu$  3356, 2941, 2864, 1725, 1598, 1464, 1278, 1174, 1093, 881  $\text{cm}^{-1}$ ;

HRMS (ESI):  $[\text{M}+\text{Na}]^+$  calculated for  $[\text{C}_{20}\text{H}_{31}\text{Br}_2\text{NO}_4\text{SiNa}]$ : 535.0389, found: 535.0394;

$[\alpha]_D^{22} = +14.2$  ( $c$  0.85, MeOH).

Enantiometric excess was determined by HPLC with a Chiralcel OJ-H column (hexane : 2-propanol = 30 : 1,  $\lambda = 298$  nm), 1.0 mL / min; major enantiomer  $t_R = 6.2$  min, minor enantiomer  $t_R = 7.2$  min.

### **5,7-Dibromo-1-(4-methoxybenzyl)indoline-2,3-dione**

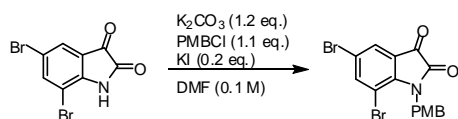

A solution of 5,7-dibromoindoline-2,3-dione (2.3 g, 7.5 mmol) in DMF (75 mL) was cooled to 0  $^\circ\text{C}$  (ice bath). Potassium carbonate (1.3 g, 9.1 mmol) and potassium iodide (0.25 g, 1.5 mmol) were added to the orange solution. The color of solution changed to deep purple. When the gas evolution stopped, *p*-methoxybenzyl chloride (1.2 mL, 8.3 mmol) was added slowly. The reaction mixture was stirred for 4 h

at 110 °C. The resulting mixture was quenched with aqueous 1N-HCl and organic materials were extracted with ethyl acetate three times, and then combined organic extracts were dried over anhydrous Na<sub>2</sub>SO<sub>4</sub>, and concentrated in vacuo after filtration. The product was washed with hexane to afford 5,7-dibromo-1-(4-methoxybenzyl)indoline-2,3-dione (3.0 g, 95%) after drying.

<sup>1</sup>H NMR (CDCl<sub>3</sub>, 400 MHz): δ 3.77 (3H, s), 5.35 (2H, s), 6.85 (2H, d, *J* = 8.4 Hz), 7.20 (2H, d, *J* = 8.4 Hz), 7.70 (1H, d, *J* = 2.0 Hz), 7.82 (1H, d, *J* = 2.0 Hz);

<sup>13</sup>C NMR (CDCl<sub>3</sub>, 100 MHz): δ 44.2, 55.3, 105.2, 114.1, 114.3, 117.1, 121.5, 127.5, 127.6, 128.0, 129.2, 145.3, 146.8, 158.4, 159.3, 181.4;

IR (KBr): ν 1744, 1600, 1513, 1447, 1315, 1247, 1178, 1144, 1031, 724 cm<sup>-1</sup>;

HRMS (ESI): [M+Na]<sup>+</sup> calculated for [C<sub>16</sub>H<sub>11</sub>Br<sub>2</sub>NO<sub>3</sub>Na]: 445.8998, found: 445.8985;

**(R)-5,7-Dibromo-3-hydroxy-3-(2-hydroxyethyl)-1-(4-methoxybenzyl)indolin-2-one**

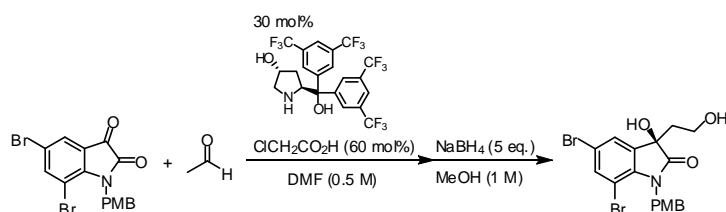

To a solution of (2*S*,4*R*)-4-hydroxy-2-(bis-[3,5-bis(trifluoromethyl)phenyl]hydroxymethyl)pyrrolidine (63 mg, 0.12 mmol), chloroacetic acid (22 mg, 0.23 mmol) and 5,7-dibromo-1-(4-methoxybenzyl)indoline-2,3-dione (163 mg, 0.38 mmol) in DMF (0.77 mL) was added acetaldehyde (108 μL, 1.93 mmol) in the sealed tube (ACE GLASS, product number 5027-05) at 4 °C. After the reaction mixture was stirred for 48 h at 4 °C, MeOH (0.5 mL) and NaBH<sub>4</sub> (56 mg, 1.5 mmol) were added, and the mixture stirred for 1 h at -20 °C. The resulting mixture was quenched with pH 7.0 phosphate buffer solution and organic materials were extracted with ethyl acetate three times, and then combined organic extracts were dried over anhydrous Na<sub>2</sub>SO<sub>4</sub>, and concentrated in vacuo after filtration. Purification by preparative thin layer chromatography (ethyl acetate : hexane = 1:1) gave (R)-5,7-dibromo-3-hydroxy-3-(2-hydroxyethyl)-1-(4-methoxybenzyl)indolin-2-one (153 mg, 0.32 mmol) in 85% yield.

<sup>1</sup>H NMR (CDCl<sub>3</sub>, 400 MHz): δ 1.92–2.01 (1H, m), 2.24–2.35 (1H, m), 3.76 (3H, s), 3.88–3.96 (1H, m), 4.01–4.16 (1H, m), 5.20–5.33 (2H, m), 6.80 (2H, d, *J* = 12.0 Hz), 7.13 (2H, d, *J* = 8.4 Hz), 7.48 (1H, d, 1.6 Hz), 7.52–7.56 (1H, m);

<sup>13</sup>C NMR (CDCl<sub>3</sub>, 100 MHz): δ 39.2, 44.0, 55.2, 58.5, 75.5, 103.4, 114.1 (2C), 116.4, 126.5, 127.7 (2C), 128.6, 135.6, 137.3, 138.8, 158.9, 178.7;

IR (KBr): ν 3393, 2362, 2330, 1716, 1513, 1452, 1247, 1177, 1144, 1033 cm<sup>-1</sup>;

HRMS (ESI): [M+Na]<sup>+</sup> calculated for [C<sub>18</sub>H<sub>17</sub>Br<sub>2</sub>NO<sub>4</sub>Na]: 491.9417, found: 491.9423;

[α]<sub>D</sub><sup>22</sup> = +15.5 (*c* 1.53, MeOH).

**(R)-5,7-Dibromo-1-(4-methoxybenzyl)-3-(triethylsilyloxy)-3-(2-(triethylsilyloxy)ethyl)indolin-2-one**

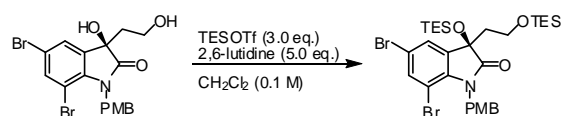

To a solution of (*R*)-5,7-dibromo-3-hydroxy-3-(2-hydroxyethyl)-1-(4-methoxybenzyl)indolin-2-one (238 mg, 0.51 mmol), 2,6-lutidine (380  $\mu$ L, 2.55 mmol) in methylene chloride (5.1 mL) were added triethylsilyl trifluoromethanesulfonate (354  $\mu$ L, 1.53 mmol). The reaction mixture was stirred for 1 h at 0  $^{\circ}$ C. The resulting mixture was quenched with pH 7.0 phosphate buffer solution. Organic materials were extracted with ethyl acetate three times, and then combined organic extracts were dried over anhydrous  $\text{Na}_2\text{SO}_4$  and concentrated in vacuo after filtration. Purification by column chromatography (ethyl acetate : hexane = 1 : 7) gave (*R*)-5,7-dibromo-1-(4-methoxybenzyl)-3-(triethylsilyloxy)-3-(2-(triethylsilyloxy)ethyl)indolin-2-one (320 mg, 0.46 mmol) in 90% yield.

$^1\text{H}$  NMR ( $\text{CDCl}_3$ , 400 MHz):  $\delta$  0.35–0.54 (12H, m), 0.83 (9H, t,  $J$  = 8.0 Hz), 0.88 (9H, t,  $J$  = 8.0 Hz), 2.04–2.13 (1H, m), 2.18–2.27 (1H, m), 3.54–3.67 (2H, m), 3.77 (3H, s), 5.21 (1H, d,  $J$  = 16.0 Hz), 5.24 (1H, d,  $J$  = 16.0 Hz), 6.80–6.85 (2H, m), 7.19–7.25 (1H, m), 7.36 (1H, d,  $J$  = 2.0 Hz), 7.36 (1H, d,  $J$  = 2.0 Hz), 7.54 (1H, d,  $J$  = 2.0 Hz);

$^{13}\text{C}$  NMR ( $\text{CDCl}_3$ , 100 MHz):  $\delta$  4.3 (3C), 5.7 (3C), 6.7 (6C), 43.1, 43.9, 55.2, 57.8, 75.9, 77.3, 102.7, 113.9 (2C), 115.6, 126.7, 128.4 (2C), 129.1, 136.8, 138.8, 158.9, 177.3;

IR (KBr):  $\nu$  2954, 2875, 1735, 1513, 1450, 1247, 1144, 1110, 1005, 736  $\text{cm}^{-1}$ ;

HRMS (ESI):  $[\text{M}+\text{Na}]^+$  calculated for  $[\text{C}_{30}\text{H}_{45}\text{Br}_2\text{NO}_4\text{Si}_2\text{Na}]$ : 720.1146, found: 720.1120;

$[\alpha]_{\text{D}}^{21} = -15.3$  ( $c$  1.36, MeOH).

The absolute configuration of (*R*)-5,7-Dibromo-3-hydroxy-3-(2-hydroxyethyl)-1-((triisopropylsilyloxy)methyl)indolin-2-one (**11**) was determined after debromination of (*R*)-5,7-dibromo-3-hydroxy-3-(2-hydroxyethyl)-1-(4-methoxybenzyl)indolin-2-one;

### **(*R*)-3-Hydroxy-3-(2-hydroxyethyl)-1-(4-methoxybenzyl)indolin-2-one**

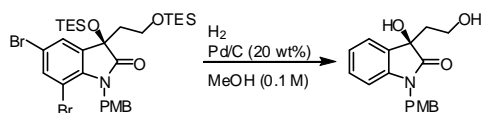

To a solution of (*R*)-5,7-dibromo-1-(4-methoxybenzyl)-3-(triethylsilyloxy)-3-(2-(triethylsilyloxy)ethyl)indolin-2-one (27.0 mg, 0.039 mmol) in MeOH (0.39 mL) was added 20% Pd/C (5.4 mg, 0.0078 mmol) at room temperature. The reaction mixture was stirred for 1h under  $\text{H}_2$  atmosphere. Warmed MeOH (5 mL) was added, and the resulting mixture was filtered through a pad of celite, and concentrated in vacuo. Purification by preparative thin layer chromatography (ethyl acetate : hexane = 1:1) gave (*R*)-3-Hydroxy-3-(2-hydroxyethyl)-1-(4-methoxybenzyl)indolin-2-one (10.7 mg, 0.019 mmol) in 88% yield. In this reaction, the deprotection of TES group proceeded in addition to debromination.

Enantiometric excess was determined by HPLC with a Chiralcel OJ-H column (hexane : 2-propanol = 10 : 1,  $\lambda$  = 254 nm), 1.0 mL / min; major enantiomer  $t_{\text{R}}$  = 28.2 min, minor enantiomer  $t_{\text{R}}$  = 26.8 min.

The absolute configuration was determined by the comparison with retention time of previous synthetic compound **7c**; see page S5.

#### **4,6-Dibromo-1-((triisopropylsilyloxy)methyl)indoline-2,3-dione (10)**

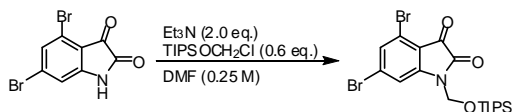

4,6-Dibromoindoline-2,3-dione was prepared from *p*-nitroaniline by known method<sup>S3</sup>. A solution of 4,6-dibromoindoline-2,3-dione (6.1 g, 20.1 mmol) in DMF (80 mL) was cooled to 0 °C (ice bath). Triethylamine (5.6 mL, 40 mmol) and (chloromethoxy)triisopropylsilane (3.0 g, 13.4 mmol) were added to the orange solution. The reaction mixture was stirred for 24 h at room temperature, then the resulting mixture was quenched with pH 7.0 phosphate buffer solution. Organic materials were extracted with ethyl acetate three times, and then combined organic extracts were dried over anhydrous Na<sub>2</sub>SO<sub>4</sub>, and concentrated in vacuo after filtration. Purification by column chromatography (ethyl acetate : hexane = 1 : 10) gave 4,6-dibromo-1-((triisopropylsilyloxy)methyl)indoline-2,3-dione (1.6 g, 3.2 mmol) in 24% yield.

<sup>1</sup>H NMR (CDCl<sub>3</sub>, 400 MHz): δ 1.04–1.09 (18H, m), 1.01–1.23 (3H, m), 5.40 (2H, s), 7.31 (1H, d, *J* = 1.6 Hz), 7.49 (1H, d, *J* = 1.6 Hz);

<sup>13</sup>C NMR (CDCl<sub>3</sub>, 100 MHz): δ 11.2 (3C), 17.1 (6C), 63.7, 105.3, 116.4, 120.6, 126.5, 144.4, 145.9, 156.8, 180.6;

IR (KBr): ν 2942, 2865, 1745, 1591, 1393, 1321, 1239, 1096, 883, 689 cm<sup>-1</sup>;

HRMS (ESI): [M+Na]<sup>+</sup> calculated for [C<sub>18</sub>H<sub>25</sub>Br<sub>2</sub>NO<sub>3</sub>SiNa]: 513.9843, found: 513.9861;

#### **(S)-4,6-Dibromo-3-hydroxy-3-(2-hydroxyethyl)-1-((triisopropylsilyloxy)methyl)indolin-2-one (12)**

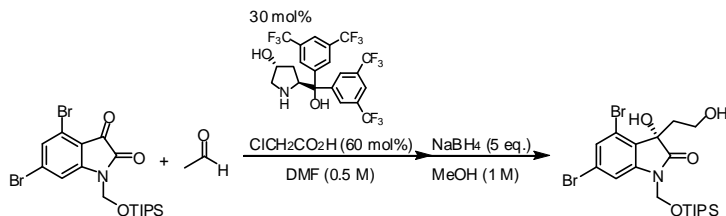

To a solution of (2*S*,4*R*)-4-hydroxy-2-(bis-[3,5-bis(trifluoromethyl)phenyl]hydroxymethyl)pyrrolidine (71 mg, 0.13 mmol), chloroacetic acid (25 mg, 0.26) and 4,6-dibromo-1-((triisopropylsilyloxy)methyl)indoline-2,3-dione (220 mg, 0.44 mmol) in DMF (0.89 mL) was added acetaldehyde (123 μL, 2.2 mmol) in the sealed tube (ACE GLASS, product number 5027-05) at 4 °C. After the reaction mixture was stirred for 48 h at 4 °C, MeOH (0.5 mL) and NaBH<sub>4</sub> (82 mg, 2.2 mmol) were added, and the reaction mixture was stirred for 1 h at –20 °C. The resulting mixture was quenched with pH 7.0 phosphate buffer solution and organic materials were extracted with ethyl acetate three times, and then combined organic extracts were dried over anhydrous Na<sub>2</sub>SO<sub>4</sub>, and concentrated in vacuo after filtration. Purification by preparative thin layer chromatography (ethyl acetate : hexane = 1:1) gave (*S*)-4,6-dibromo-3-hydroxy-3-(2-hydroxyethyl)-1-((triisopropylsilyloxy)methyl)indolin-2-one (207 mg, 0.86 mmol) in 86% yield with 82% ee.

<sup>1</sup>H NMR (CDCl<sub>3</sub>, 400 MHz): δ 1.03–1.09 (18H, m), 1.10–1.20 (3H, m), 2.01–2.14 (1H, m), 2.75–2.86 (1H, m), 3.79–4.00 (3H, m), 5.30 (1H, d, *J* = 9.6 Hz), 5.35 (1H, d, *J* = 9.6 Hz), 7.20 (1H, d, *J* = 0.8 Hz), 7.40 (1H, d, *J* = 0.8 Hz);

<sup>13</sup>C NMR (CDCl<sub>3</sub>, 100 MHz): δ 11.8 (3C), 17.8 (6C), 36.4, 58.3, 65.1, 77.5, 113.1, 119.8, 123.8, 126.9, 129.7, 144.4, 176.3;

IR (KBr): ν 3356, 2941, 2864, 1725, 1598, 1464, 1278, 1174, 1093, 881 cm<sup>-1</sup>;

HRMS (ESI):  $[M+Na]^+$  calculated for  $[C_{20}H_{31}Br_2NO_4SiNa]$ : 535.0389, found: 535.0391;

$[\alpha]_D^{17} = -11.2$  ( $c$  0.76, MeOH).

Enantiometric excess was determined by HPLC with a Chiralcel OJ-H column (hexane : 2-propanol = 50 : 1,  $\lambda$  = 222 nm), 0.5 mL / min; major enantiomer  $t_R$  = 22.9 min, minor enantiomer  $t_R$  = 21.1 min.

### **ent-Convolutamydine E (13)**

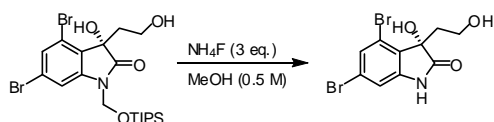

To a solution of (*S*)-4,6-dibromo-3-hydroxy-3-(2-hydroxyethyl)-1-((triisopropylsilyloxy)methyl)indolin-2-one (40 mg, 0.082 mmol) in MeOH (0.16 mL) was added ammonium fluoride (9.1 mg, 0.25 mmol) at room temperature. The reaction mixture was stirred for 12 h at 70 °C. After that reaction was concentrated in vacuo, purification by preparative thin layer chromatography (ethyl acetate) gave *ent*-Convolutamydine E (19.0 mg, 0.062 mmol) in 76% yield.

$^1H$  NMR (pyridine- $d_5$ , 400 MHz):  $\delta$  3.20 (2H, t,  $J$  = 6.8 Hz), 3.62 (1H, s), 4.00–4.04 (2H, m), 7.12 (1H, s), 7.49 (1H, s);

$^{13}C$  NMR (pyridine- $d_5$ , 100 MHz):  $\delta$  39.2, 58.0, 77.4, 112.5, 120.8, 128.1, 130.1, 130.1, 146.7, 180.6;

IR (KBr):  $\nu$  3275, 2923, 2380, 2348, 1729, 1607, 1574, 1424, 1168, 1082  $cm^{-1}$ ;

HRMS (ESI):  $[M+Na]^+$  calculated for  $[C_{10}H_9Br_2NO_3Na]$ : 371.8841, found: 371.8832;

$[\alpha]_D^{20} = -7.8$  ( $c$  0.67, MeOH, *ent*-Convolutamydine E).

lit.<sup>S4)</sup>  $[\alpha]_D = +12.6$  ( $c$  1.00, MeOH, Convolutamydine E).

### **(R)-2-(3-Hydroxy-2-oxo-1-((triisopropylsilyloxy)methyl)indolin-3-yl)ethyl methanesulfonate (16)**

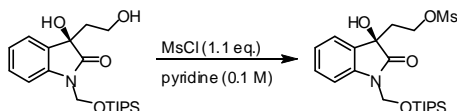

To a solution of (*R*)-3-hydroxy-3-(2-hydroxyethyl)-1-((triisopropylsilyloxy)methyl)indolin-2-one (492 mg, 1.30 mmol) in pyridine (13 mL) was added methanesulfonyl chloride (111  $\mu$ L, 1.43 mmol) at 0 °C. The reaction mixture was stirred for 3 h at room temperature. The resulting mixture was quenched with aqueous 1N-HCl and organic materials were extracted with ethyl acetate three times, and then combined organic extracts were dried over anhydrous  $Na_2SO_4$ , and concentrated in vacuo after filtration. Purification by column chromatography (ethyl acetate : hexane = 1 : 3) gave (*R*)-2-(3-hydroxy-2-oxo-1-((triisopropylsilyloxy)methyl)indolin-3-yl)ethyl methanesulfonate (445 mg, 0.97 mmol) in 75% yield.

$^1H$  NMR ( $CDCl_3$ , 400 MHz):  $\delta$  1.03–1.09 (18H, m), 1.11–1.24 (3H, m), 2.33 (1H, dt,  $J$  = 6.4, 14.4 Hz), 2.41–2.51 (1H, m), 2.90 (3H, s), 4.32–4.38 (2H, m), 5.36 (2H, d,  $J$  = 1.2 Hz), 7.09–7.18 (2H, m), 7.33–7.43 (2H, m);

$^{13}C$  NMR ( $CDCl_3$ , 100 MHz):  $\delta$  11.9 (3C), 17.8 (6C), 37.2, 37.3, 65.0, 74.8, 77.3, 110.6, 123.6, 124.0, 128.7, 130.3, 141.8, 176.1;

IR (KBr):  $\nu$  3437, 2944, 2866, 1730, 1615, 1469, 1359, 1175, 1094, 752  $cm^{-1}$ ;

HRMS (ESI):  $[M+Na]^+$  calculated for  $[C_{21}H_{35}NSO_6SiNa]$ : 480.1847, found: 480.1835;

$[\alpha]_D^{21} = +7.8$  ( $c$  0.80, MeOH).

**(R)-3-(2-Azidoethyl)-3-hydroxy-1-((triisopropylsilyloxy)methyl)indolin-2-one (17)**

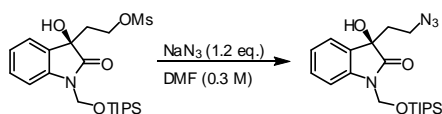

To a solution of (*R*)-2-(3-hydroxy-2-oxo-1-((triisopropylsilyloxy)methyl)indolin-3-yl)ethyl methane sulfonate (572 mg, 1.25 mmol) in DMF (4.2 mL) was added sodium azide (98 mg, 1.50 mmol) at room temperature. The reaction mixture was stirred for 6 h at 60 °C. The resulting mixture was quenched with pH 7.0 phosphate buffer solution and organic materials were extracted with ethyl acetate three times, and then combined organic extracts were dried over anhydrous Na<sub>2</sub>SO<sub>4</sub>, and concentrated in vacuo after filtration. Purification by column chromatography (ethyl acetate : hexane = 1 : 3) gave (*R*)-2-(3-hydroxy-2-oxo-1-((triisopropylsilyloxy)methyl)indolin-3-yl)ethyl methanesulfonate (419 mg, 1.04 mmol) in 83% yield.

<sup>1</sup>H NMR (CDCl<sub>3</sub>, 400 MHz): δ 1.06 (18H, dd, *J* = 2.4, 7.2 Hz), 1.10–1.23 (3H, m), 2.09–2.20 (1H, m), 2.28 (1H, dt, *J* = 8.0, 13.6 Hz), 3.34–3.45 (2H, m), 5.31 (1H, d, *J* = 9.6 Hz), 5.41 (1H, d, *J* = 9.6 Hz), 7.08–7.16 (2H, m), 7.32–7.41 (2H, m);

<sup>13</sup>C NMR (CDCl<sub>3</sub>, 100 MHz): δ 11.9 (3C), 17.8 (6C), 37.0, 46.2, 64.9, 75.2, 110.5, 123.4, 123.8, 128.9, 130.1, 141.7, 176.3;

IR (KBr): ν 3402, 2943, 2866, 2097, 1715, 1616, 1469, 1366, 1092, 751 cm<sup>-1</sup>;

HRMS (ESI): [M+Na]<sup>+</sup> calculated for [C<sub>20</sub>H<sub>32</sub>N<sub>4</sub>O<sub>3</sub>SiNa]: 427.2136, found: 427.2133;

[α]<sub>D</sub><sup>20</sup> = +12.5 (*c* 1.20, MeOH).

**(R)-3-(2-Azidoethyl)-3-hydroxyindolin-2-one (18)**

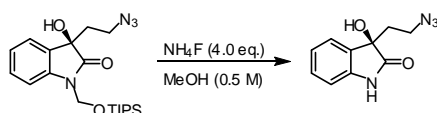

To a solution of (*R*)-3-(2-azidoethyl)-3-hydroxy-1-((triisopropylsilyloxy)methyl)indolin-2-one (390 mg, 0.97 mmol) in MeOH (2.0 mL) was added ammonium fluoride (144 mg, 3.8 mmol) at room temperature. The reaction mixture was stirred for 3 h at 70 °C. The resulting mixture was concentrated in vacuo. Purification by preparative thin layer chromatography (ethyl acetate : hexane = 1:1) gave (*R*)-3-(2-azidoethyl)-3-hydroxyindolin-2-one (207 mg, 0.97 mmol) in 98% yield.

<sup>1</sup>H NMR (CDCl<sub>3</sub>, 400 MHz): δ 2.14–2.23 (1H, m), 2.28 (1H, dt, *J* = 7.6, 14.0 Hz), 3.41 (2H, dt, *J* = 2.4, 7.6 Hz), 6.89 (1H, d, *J* = 8.0 Hz), 7.18 (1H, dt, *J* = 0.8, 7.6 Hz), 7.29 (1H, dt, *J* = 1.6, 8.0 Hz), 7.36 (1H, d, *J* = 7.6 Hz);

<sup>13</sup>C NMR (CDCl<sub>3</sub>, 100 MHz): δ 36.9, 46.3, 75.3, 110.4, 123.4, 124.4, 129.6, 130.1, 140.1, 178.9;

IR (KBr): ν 3313, 2358, 2098, 1706, 1471, 1333, 1264, 1212, 1183, 753 cm<sup>-1</sup>;

HRMS (ESI): [M+Na]<sup>+</sup> calculated for [C<sub>10</sub>H<sub>10</sub>N<sub>4</sub>O<sub>2</sub>Na]: 241.0696, found: 241.0692;

[α]<sub>D</sub><sup>24</sup> = +2.8 (*c* 0.31, MeOH).

**(R)-3-(2-Azidoethyl)-3-methoxy-1-methylindolin-2-one (19)**

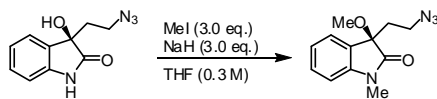

To a solution of (*R*)-3-(2-azidoethyl)-3-hydroxyindolin-2-one (218 mg, 0.99 mmol) in THF (3.3 mL) was cooled to 0 °C (ice bath). Then NaH (60% dispersion in mineral oil, 129 mg, 2.97 mmol) was added portionwise. When the gas evolution stopped, methyl iodide (0.18 mL, 2.97 mmol) was added slowly. The reaction mixture was stirred for 4 h at room temperature. The resulting mixture was quenched with pH 7.0 phosphate buffer solution and organic materials were extracted with ethyl acetate three times, and then combined organic extracts were dried over anhydrous Na<sub>2</sub>SO<sub>4</sub>, and concentrated in vacuo after filtration. Purification by column chromatography (ethyl acetate : hexane = 1 : 3) gave (*R*)-3-(2-azidoethyl)-3-methoxy-1-methylindolin-2-one (207 mg, 0.84 mmol) in 85% yield.

<sup>1</sup>H NMR (CDCl<sub>3</sub>, 400 MHz): δ 2.06–2.16 (1H, m), 2.20–2.31 (1H, m), 2.99 (3H, s), 3.22 (3H, s), 3.27–3.45 (2H, m), 6.87 (1H, d, *J* = 8.0 Hz), 7.11–7.16 (1H, m), 7.29 (1H, d, *J* = 7.2 Hz), 7.34–7.41 (1H, m);

<sup>13</sup>C NMR (CDCl<sub>3</sub>, 100 MHz): δ 26.1, 36.6, 45.9, 52.8, 80.9, 108.5, 123.1, 124.1, 126.3, 130.2, 143.9, 175.3;

IR (KBr): ν 2934, 2098, 1725, 1613, 1492, 1469, 1372, 1348, 1105, 754 cm<sup>-1</sup>;

HRMS (ESI): [M+Na]<sup>+</sup> calculated for [C<sub>12</sub>H<sub>14</sub>N<sub>4</sub>O<sub>2</sub>Na]: 269.1009, found: 269.1005;

[α]<sub>D</sub><sup>23</sup> = −18.8 (*c* 1.20, MeOH).

**(3a*R*,8a*R*)-3a-Methoxy-8-methyl-1,2,3,3a,8,8a-hexahydropyrrolo[2,3-*b*]indole (20)**

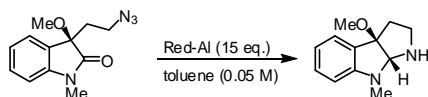

To a solution of (*R*)-3-(2-azidoethyl)-3-methoxy-1-methylindolin-2-one (14 mg, 0.058 mmol) in toluene (1.2 mL) was added sodium bis(2-methoxyethoxy)aluminum hydride (65 wt% in toluene; 0.26 mL, 0.87 mmol) at 0 °C. The reaction mixture was stirred for 1.5 h at room temperature. After that the solution was heated to 80 °C and maintained at 80 °C for 8 h. After cooling to room temperature, the resulting mixture was quenched with saturated aqueous sodium potassium tartrate (7 mL), diluted with ethyl acetate (5 mL), and stirred vigorously for 45 min. Organic materials were extracted with ethyl acetate three times, and then combined organic extracts were dried over anhydrous Na<sub>2</sub>SO<sub>4</sub>, and concentrated in vacuo after filtration. Purification by preparative thin layer chromatography (methanol : chloroform = 1 : 10) gave (3a*R*,8a*R*)-3a-methoxy-8-methyl-1,2,3,3a,8,8a-hexahydropyrrolo[2,3-*b*]indole (7.2 mg, 0.035 mmol) in 61% yield.

<sup>1</sup>H NMR (CDCl<sub>3</sub>, 400 MHz): δ 2.17–2.23 (2H, m), 2.75 (1H, dt, *J* = 8.4, 11.2 Hz), 2.86 (3H, s), 3.09 (3H, s), 3.11–3.17 (1H, m), 4.78 (1H, s), 6.41 (1H, d, *J* = 8.0 Hz), 6.69 (1H, dt, *J* = 0.8, 7.6 Hz), 7.14–7.21 (2H, m);

<sup>13</sup>C NMR (CDCl<sub>3</sub>, 100 MHz): δ 31.8, 41.9, 45.4, 52.9, 86.4, 94.7, 106.0, 117.1, 124.4, 126.7, 129.9, 152.3;

IR (KBr): ν 2937, 2360, 2341, 1609, 1490, 1294, 1099, 938, 743 cm<sup>-1</sup>;



HRMS (ESI):  $[M+Na]^+$  calculated for  $[C_{12}H_{16}N_2ONa]$ : 227.1155, found: 227.1164;  
 $[\alpha]_D^{19} = -79.1$  ( $c$  0.64, MeOH).

### CPC-1 (21)

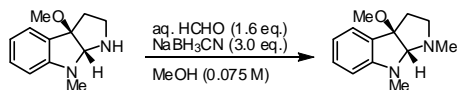

To a solution of (3a*R*,8a*R*)-3a-methoxy-8-methyl-1,2,3,3a,8,8a-hexahydropyrrolo[2,3-*b*]indole (37 mg, 0.18 mmol) in MeOH (2.4 mL) was added formaldehyde (37% water solution, 23  $\mu$ L, 0.29 mmol) at 0 °C. The reaction mixture was stirred for 1 h at room temperature. Then, NaBH<sub>3</sub>CN (34 mg, 0.54 mmol) was added and the reaction mixture was stirred for 1 h at room temperature. The resulting mixture was quenched with pH 7.0 phosphate buffer solution and organic materials were extracted with ethyl acetate three times, and then combined organic extracts were dried over anhydrous Na<sub>2</sub>SO<sub>4</sub>, and concentrated in vacuo after filtration. Purification by preparative thin layer chromatography (methanol : chloroform = 1 : 10) gave CPC-1 (27 mg, 0.12 mmol) in 67% yield.

<sup>1</sup>H NMR (CDCl<sub>3</sub>, 400 MHz):  $\delta$  2.13 (1H, ddd,  $J$  = 4.5, 6.0, 12.3 Hz), 2.35 (1H, ddd,  $J$  = 6.8, 8.3, 12.3 Hz), 2.58 (3H, s), 2.62 (1H, dt,  $J$  = 6.0, 8.8 Hz), 2.80 (1H, ddd,  $J$  = 4.4, 6.8, 9.2 Hz), 2.97 (3H, s), 3.04 (3H, s), 4.36 (1H, s), 6.51 (1H, d,  $J$  = 7.6 Hz), 6.75 (1H, dt,  $J$  = 1.2, 7.6 Hz), 7.16 (1H, dd,  $J$  = 1.2, 7.6 Hz), 7.20 (1H, dt,  $J$  = 1.2, 7.6 Hz);

<sup>13</sup>C NMR (CDCl<sub>3</sub>, 100 MHz): 36.2, 38.6, 39.3, 52.4, 52.5, 91.7, 94.1, 107.8, 117.9, 124.1, 128.1, 129.7, 153.1

IR (KBr):  $\nu$  2938, 2791, 1608, 1489, 1162, 1098, 1041, 933, 742 cm<sup>-1</sup>;

HRMS (ESI):  $[M+Na]^+$  calculated for  $[C_{13}H_{18}N_2ONa]$ : 241.1311, found: 241.1302;

$[\alpha]_D^{19} = -83.0$  ( $c$  0.73, MeOH).

lit.<sup>S5)</sup>  $[\alpha]_D^{26} = -88$  ( $c$  0.1, MeOH).

### References;

- S1) T. Sunazuka, T. Hirose, T. Shirahata, Y. Harigaya, M. Hayashi, K. Komiyama, S. Omura, A. B. Smith III, *J. Am. Chem. Soc.* **2000**, *122*, 2122.  
S2) H. G. Lindwall, J. Bandes, I. Weinberg, *J. Am. Chem. Soc.* **1931**, *53*, 317.  
S3) S. J. Garden, J. C. Torres, A. A. Ferreira, R. B. Silva, A. C. Pinto, *Tetrahedron Lett.* **1997**, *38*, 1501.  
S4) T. Nakamura, S. Shirokawa, S. Hosokawa, A. Nakazaki, S. Kobayashi, *Org. Lett.* **2006**, *8*, 677.  
S5) M. Kitajima, I. Mori, K. Arai, N. Kogure, H. Takayama, *Tetrahedron Lett.* **2006**, *47*, 3199.

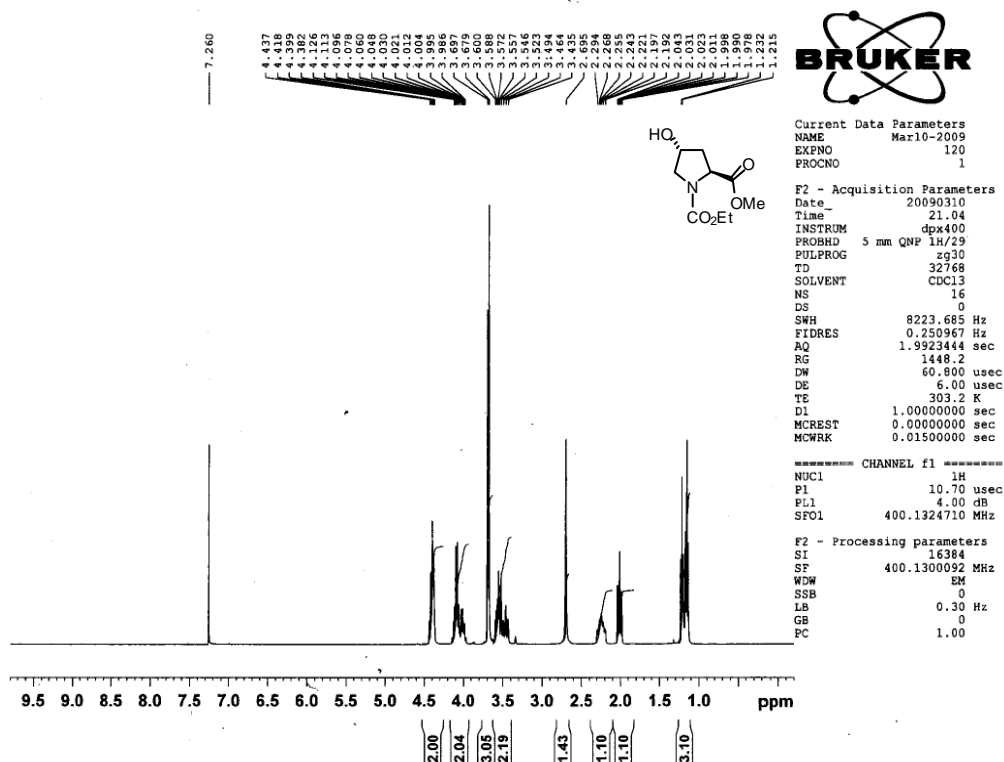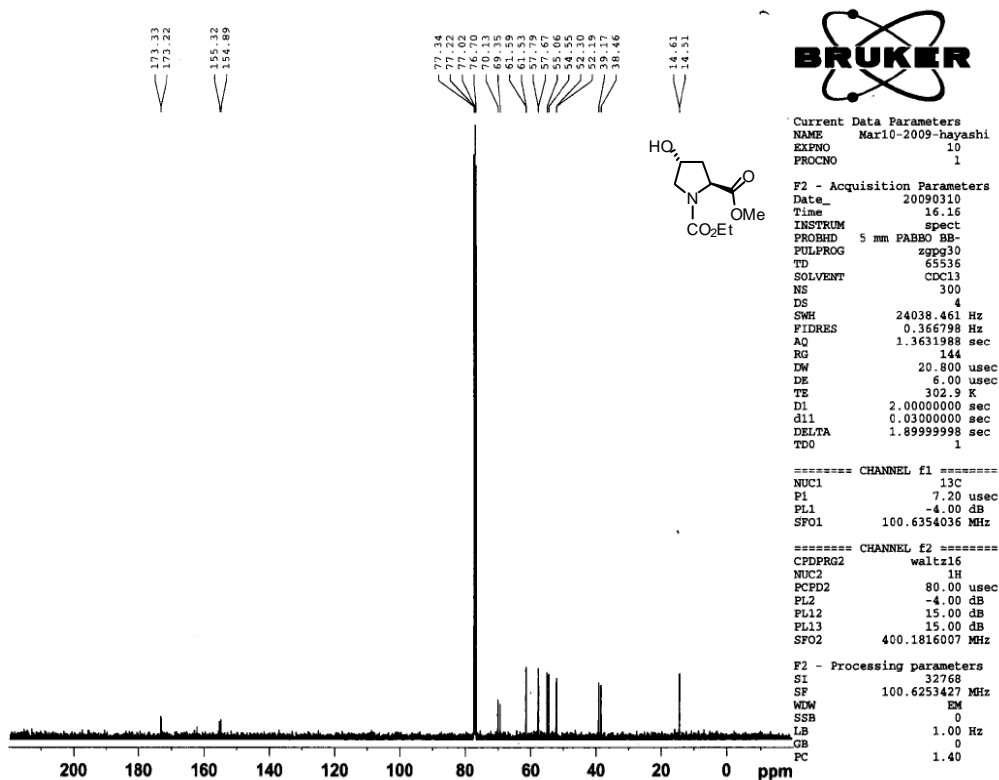

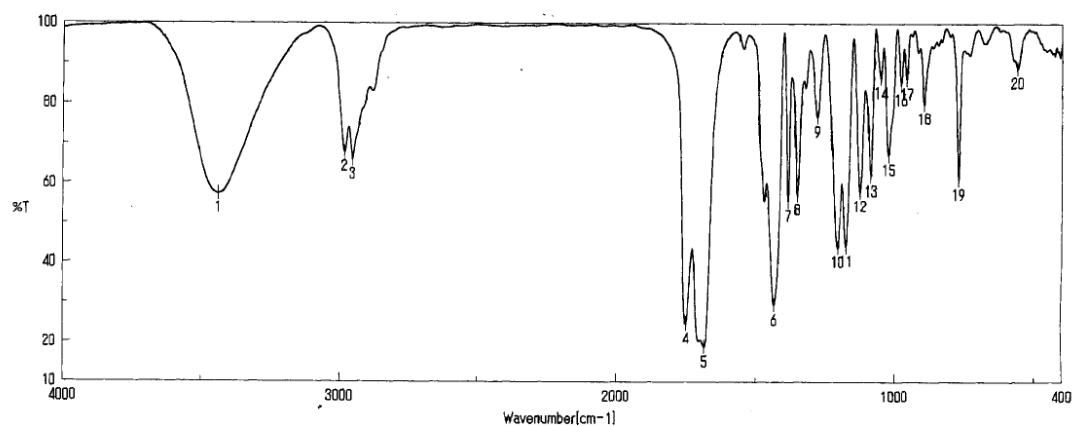

積算回数 16  
 ゼロフィリング ON  
 ゲイン 2  
 日時 10/03/10 18:40  
 測定者  
 ファイル名 Memory#3  
 サンプル名 background  
 コメント

分解 4 cm⁻¹  
 アポダイゼーション Cosine  
 スキャンスピード 2 mm/sec

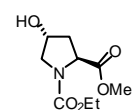

|                      |                      |                      |                      |
|----------------------|----------------------|----------------------|----------------------|
| 1: 3439.42, 57.3560  | 2: 2984.30, 67.8789  | 3: 2954.41, 65.9904  | 4: 1749.12, 24.7730  |
| 5: 1682.59, 18.8285  | 6: 1434.78, 29.3856  | 7: 1383.68, 55.5817  | 8: 1350.89, 57.1559  |
| 9: 1277.61, 76.6739  | 10: 1205.29, 43.9232 | 11: 1174.44, 44.1738 | 12: 1126.22, 58.0948 |
| 13: 1086.69, 61.8590 | 14: 1050.05, 86.5472 | 15: 1024.02, 67.1091 | 16: 978.70, 84.7850  |
| 17: 957.48, 86.1910  | 18: 696.74, 90.0592  | 19: 773.32, 61.0680  | 20: 562.15, 88.9576  |

|                                 |                       |
|---------------------------------|-----------------------|
| 積算回数=the number of accumulation | 分解=resolution         |
| ゼロフィリング=zero filling            | アポダイゼーション=apodization |
| ゲイン=gain                        | スキャンスピード=scan speed   |
| 日時=date                         |                       |
| 測定者=user name                   |                       |
| ファイル名=file name                 |                       |
| サンプル名=sample name               |                       |
| コメント=comment                    |                       |

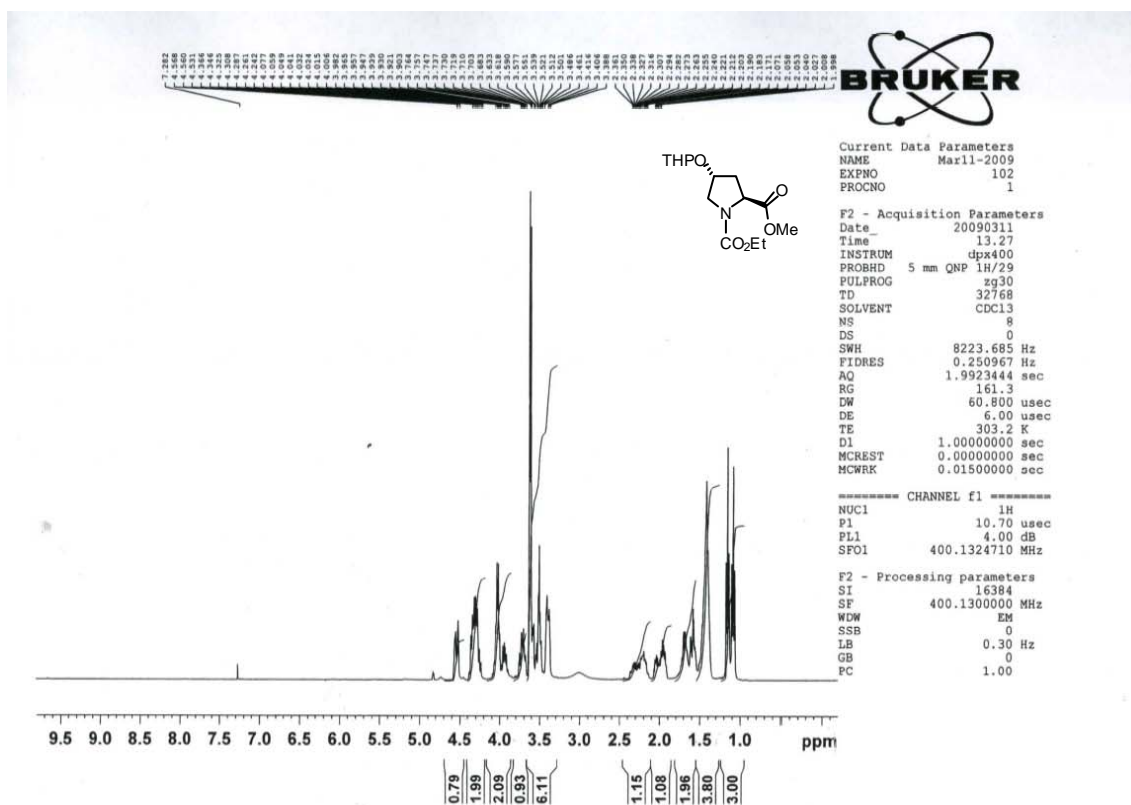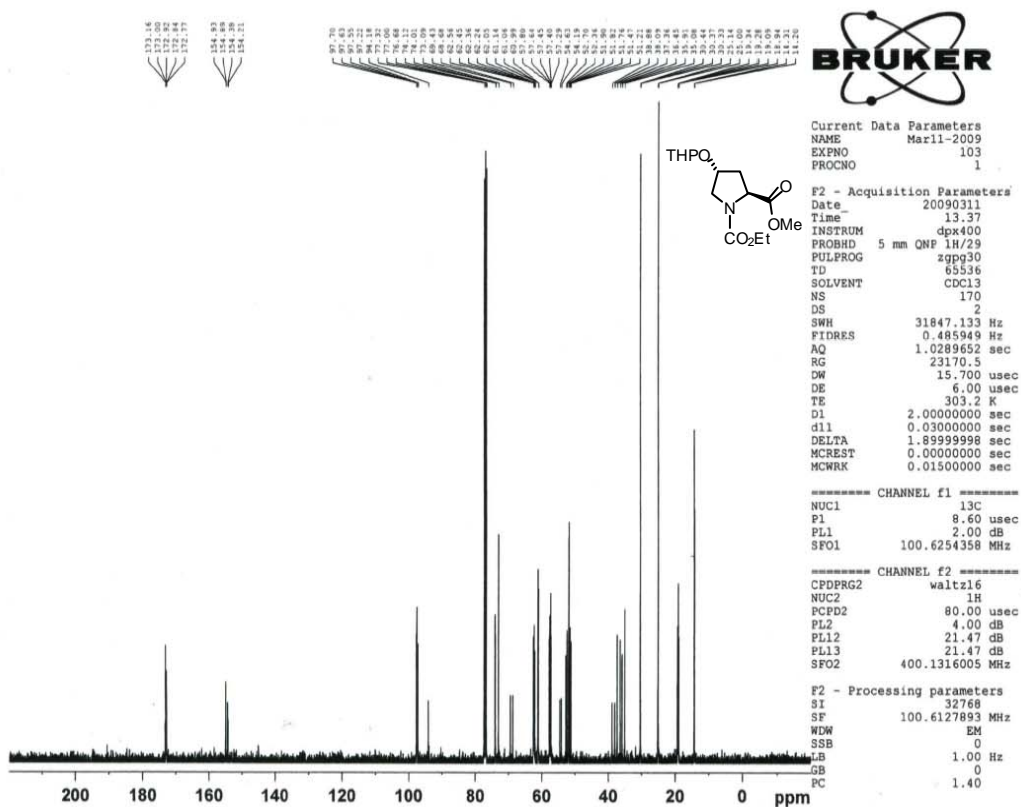

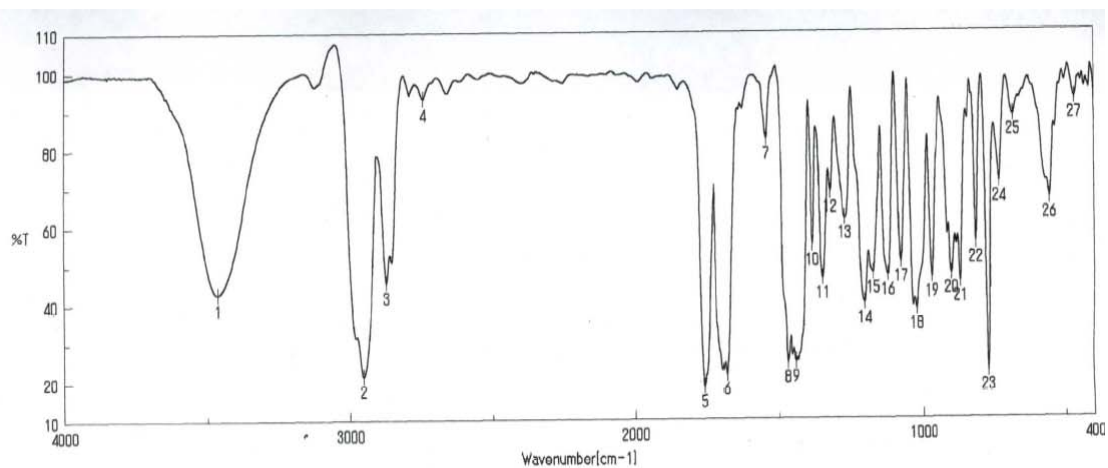

積算回数  
 ゼロファイリング  
 ゲイン  
 日時  
 測定者  
 ファイル名  
 サンプル名  
 コメント

16  
 ON  
 2  
 109/03/11 19:48  
 Memory#3  
 buckground

分解  
 アボダイゼーション  
 スキャンスピード

4 cm-1  
 Cosine  
 2 mm/sec

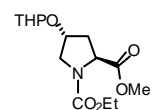

|                      |                      |                      |                      |
|----------------------|----------------------|----------------------|----------------------|
| 1: 3461.60, 42.8242  | 2: 2952.48, 21.6119  | 3: 2870.52, 45.6707  | 4: 2741.32, 93.0654  |
| 5: 1756.83, 18.5669  | 6: 1681.62, 21.7069  | 7: 1543.74, 82.5993  | 8: 1469.49, 24.7528  |
| 9: 1442.49, 24.9478  | 10: 1383.68, 55.1146 | 11: 1347.03, 46.4233 | 12: 1321.00, 68.6932 |
| 13: 1270.86, 62.0144 | 14: 1203.36, 40.0492 | 15: 1173.47, 47.6789 | 16: 1122.37, 47.2491 |
| 17: 1077.05, 50.6431 | 18: 1022.09, 38.4555 | 19: 969.05, 46.7079  | 20: 900.59, 47.5202  |

|                     |                     |                     |                     |
|---------------------|---------------------|---------------------|---------------------|
| 21: 869.74, 45.5185 | 22: 813.81, 55.4627 | 23: 772.35, 22.4313 | 24: 733.78, 71.2444 |
| 25: 684.61, 88.4793 | 26: 557.33, 67.0409 | 27: 469.68, 92.8297 |                     |



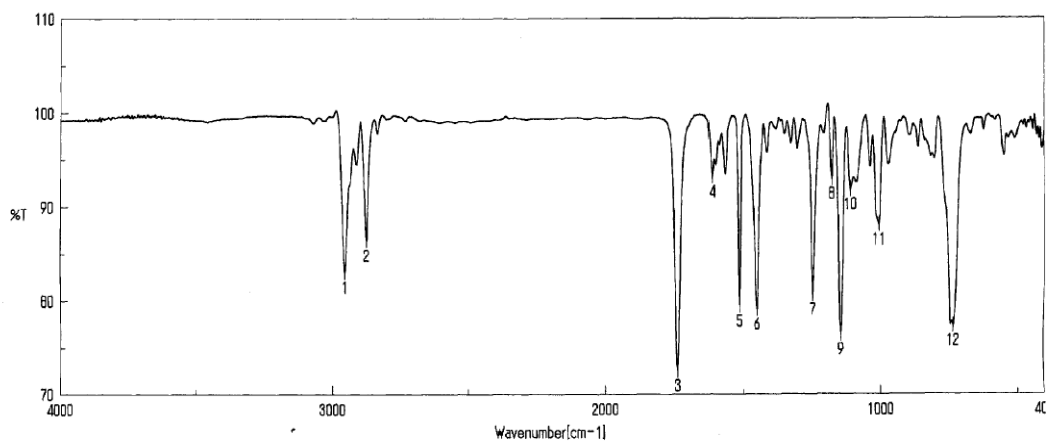

積算回数  
ゼロファイリング  
ゲイン  
日時  
測定者  
ファイル名  
サンプル名  
コメント

16  
ON  
2  
106/03/11 20:19  
Memory#5  
background

分解  
アポダイゼーション  
スキャンスピード

4 cm-1  
Cosine  
2 mm/sec

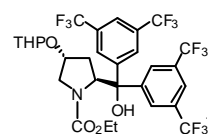

|                     |                      |                      |                     |
|---------------------|----------------------|----------------------|---------------------|
| 1: 2954.41, 83.0789 | 2: 2875.34, 86.4379  | 3: 1735.62, 72.5595  | 4: 1613.16, 93.2559 |
| 5: 1513.85, 79.4440 | 6: 1451.17, 79.1066  | 7: 1247.72, 80.7302  | 8: 1177.33, 93.0283 |
| 9: 1144.55, 78.4633 | 10: 1109.83, 91.9178 | 11: 1005.70, 88.1501 | 12: 736.67, 77.3761 |

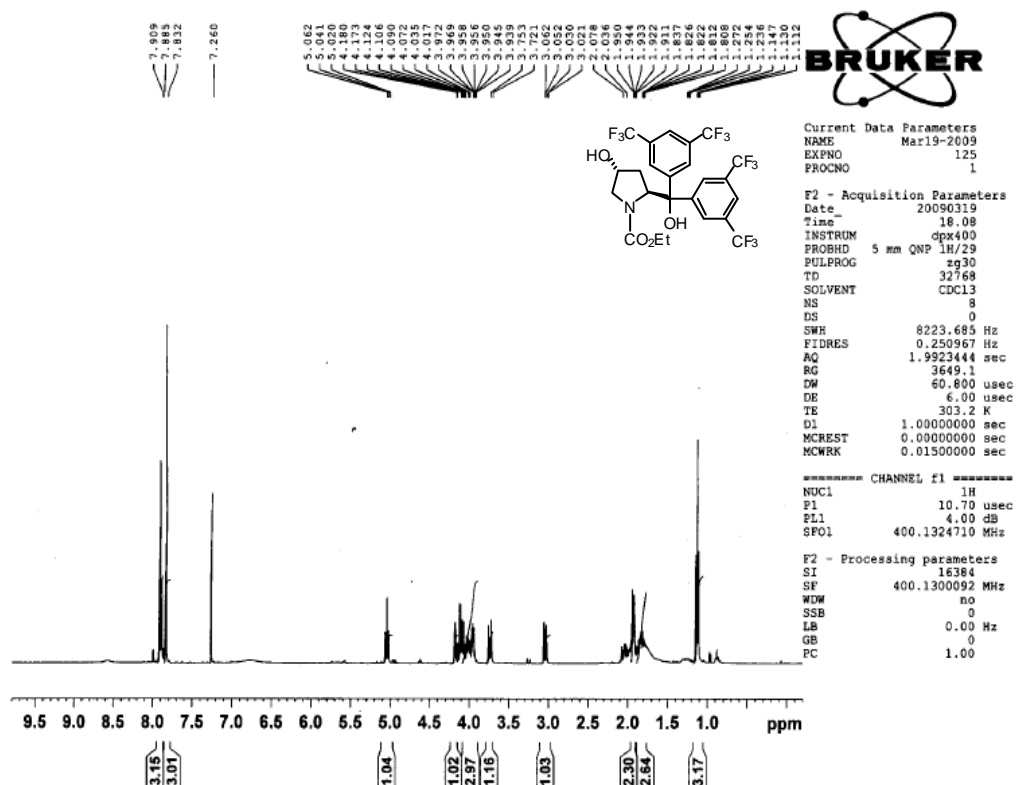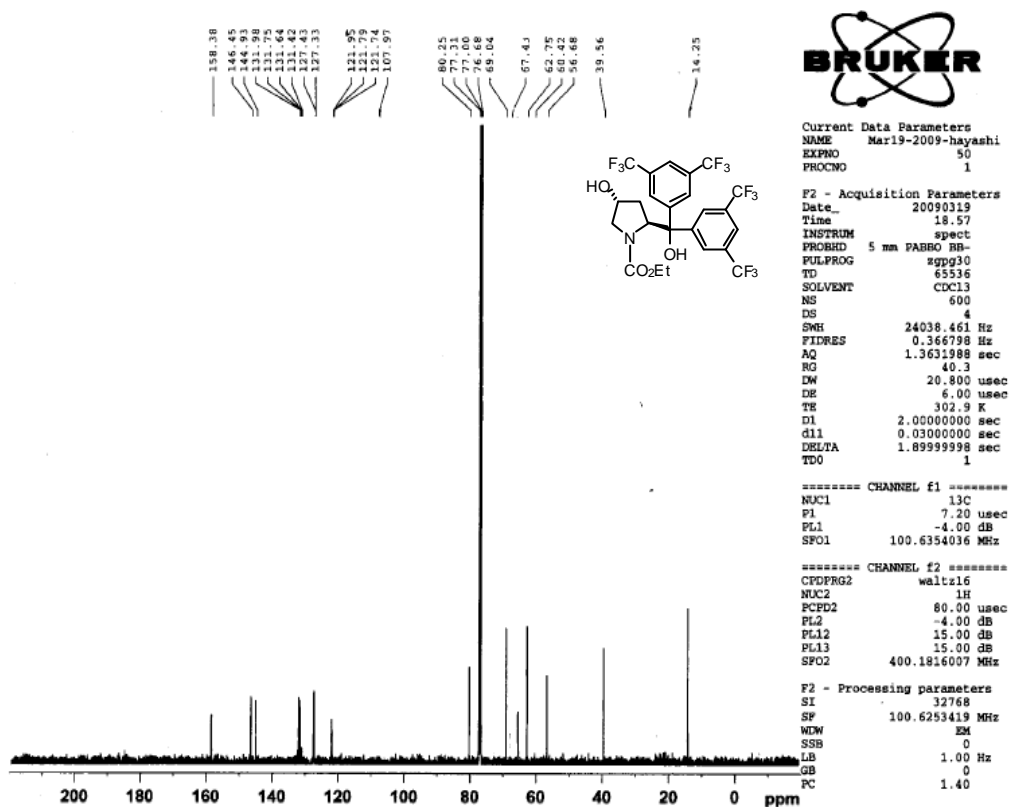



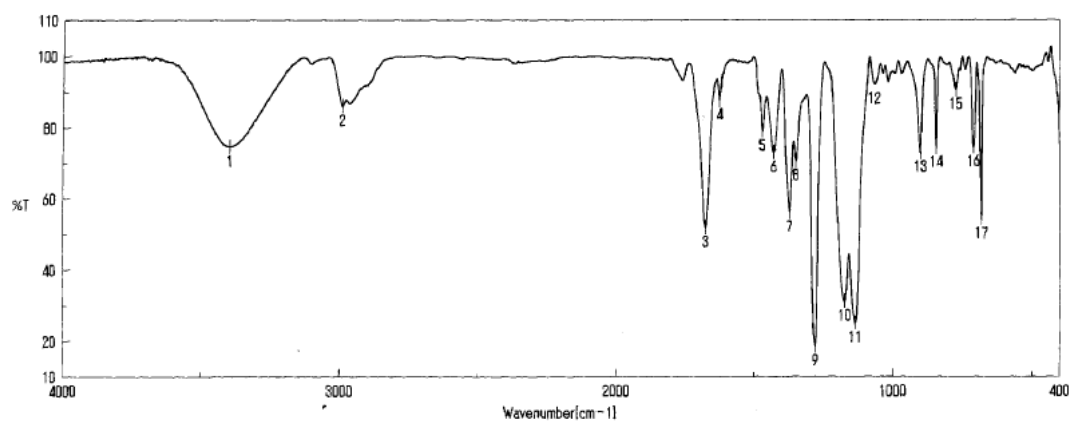

積算回数  
ゼロフィリング  
ゲイン  
日時  
測定者  
ファイル名  
サンプル名  
コメント

32  
ON  
2  
109/04/24 11:39  
Memory#3  
background

分解  
アポダイゼーション  
スキャンスピード

4 cm⁻¹  
Cosine  
2 cm/sec

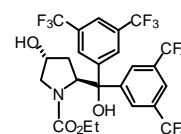

|                     |                      |                      |                      |
|---------------------|----------------------|----------------------|----------------------|
| 1: 3393.14, 74.6334 | 2: 2987.20, 66.1250  | 3: 1675.84, 51.9780  | 4: 1624.73, 67.7940  |
| 5: 1470.46, 79.0937 | 6: 1429.96, 73.1706  | 7: 1372.10, 56.2901  | 8: 1348.96, 70.7330  |
| 9: 1279.54, 18.7468 | 10: 1173.47, 31.4150 | 11: 1134.90, 25.2293 | 12: 1066.44, 92.3618 |
| 13: 901.56, 73.1558 | 14: 844.67, 74.4791  | 15: 773.32, 90.7548  | 16: 710.64, 74.6391  |
| 17: 682.88, 54.4788 |                      |                      |                      |

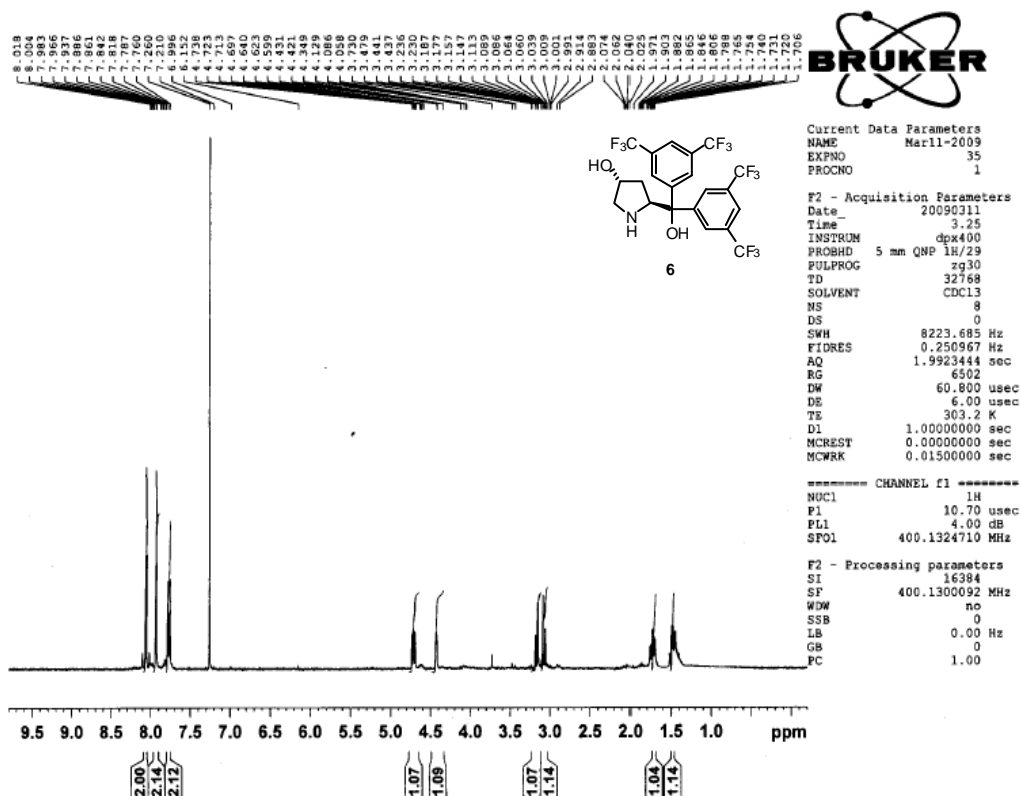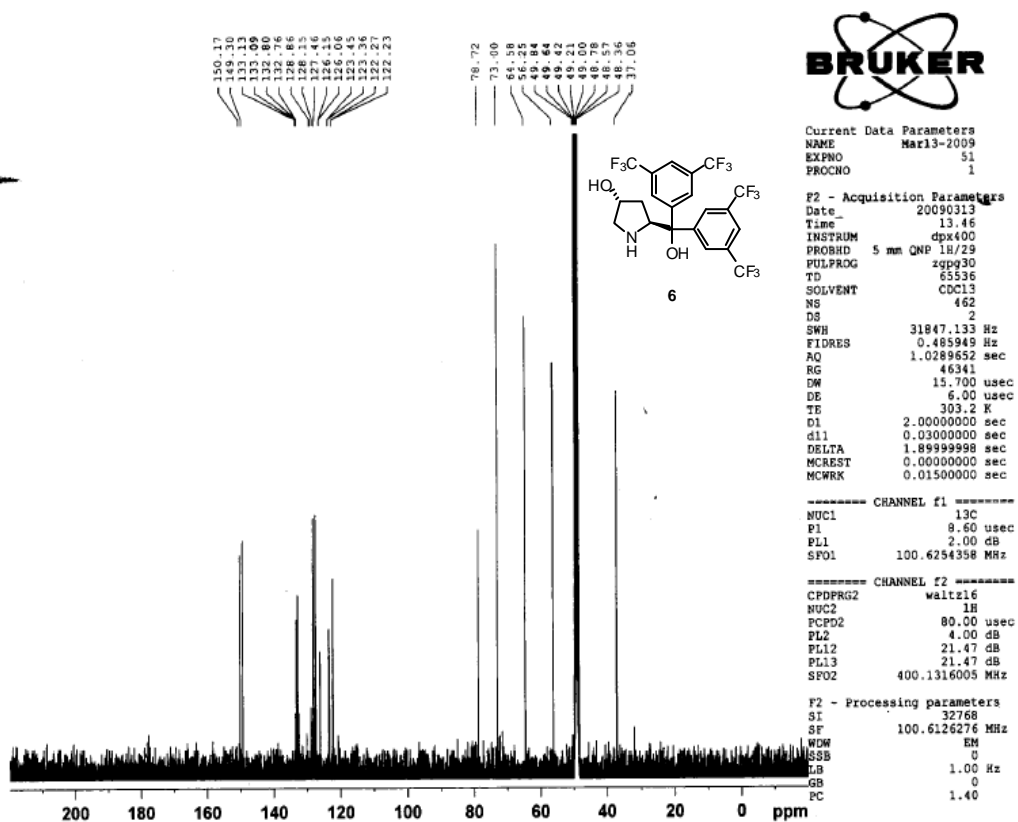

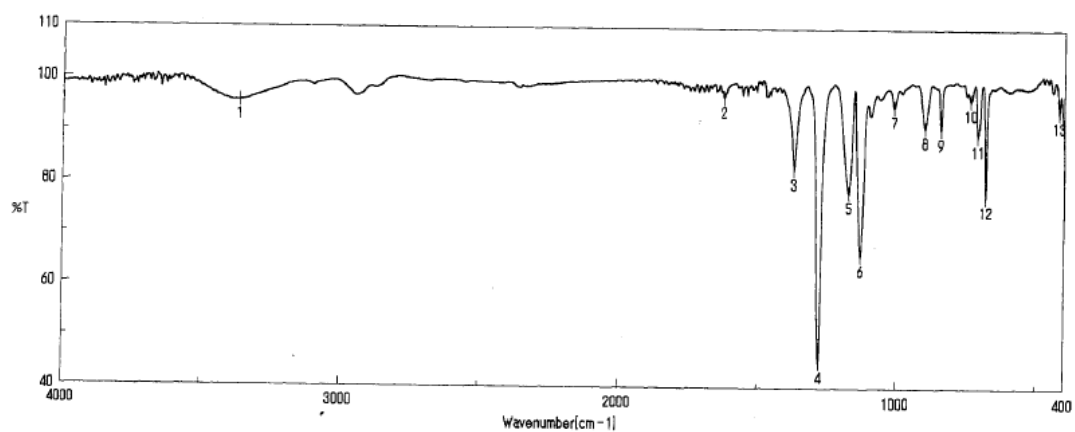

積算回数  
ゼロファイリング  
ゲイン  
日時  
測定者  
ファイル名  
サンプル名  
コメント

16  
ON  
2  
109/03/11 20:09  
Memory#2  
background

分解  
アポダイゼーション  
スキャンスピード

4 cm-1  
Cosine  
2 mm/sec

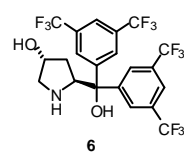

|                     |                     |                     |                     |
|---------------------|---------------------|---------------------|---------------------|
| 1: 3385.17, 95.7224 | 2: 1624.73, 96.6898 | 3: 1372.10, 82.6798 | 4: 1278.57, 45.1105 |
| 5: 1174.44, 78.2102 | 6: 1131.05, 65.8814 | 7: 1013.41, 95.0227 | 8: 902.52, 90.9982  |
| 9: 844.67, 90.6281  | 10: 737.64, 96.4286 | 11: 711.60, 89.3870 | 12: 682.66, 77.4696 |
| 13: 418.48, 93.9506 |                     |                     |                     |

Bn-isatin

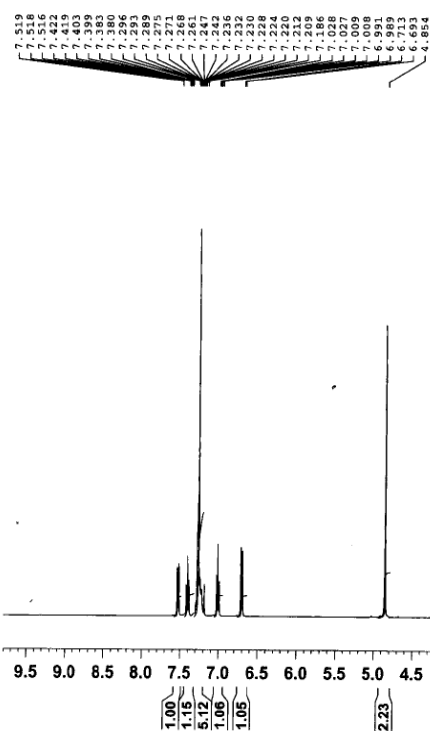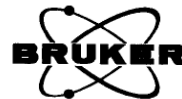

Current Data Parameters  
 NAME Dec06-2008-hayashi  
 EXPNO 80  
 PROCNO 1

F2 - Acquisition Parameters  
 Date\_ 20081206  
 Time 11.44  
 INSTRUM spect  
 PROBRD 5 mm PABBO BB-  
 PULPROG zg30  
 TD 65536  
 SOLVENT CDCl3  
 NS 16  
 DS 2  
 SWH 8223.685 Hz  
 FIDRES 0.125483 Hz  
 AQ 3.9846387 sec  
 RG 181  
 DW 50.800 usec  
 DE 6.00 usec  
 TE 303.0 K  
 D1 1.00000000 sec  
 TDO 1

===== CHANNEL f1 =====  
 NUC1 1H  
 P1 12.00 usec  
 PL1 -4.00 dB  
 SFO1 400.1824713 MHz

F2 - Processing parameters  
 SI 32768  
 SF 400.1800369 MHz  
 WDW EM  
 SSB 0  
 LB 0.30 Hz  
 GB 0  
 PC 1.00

Bn-isatin

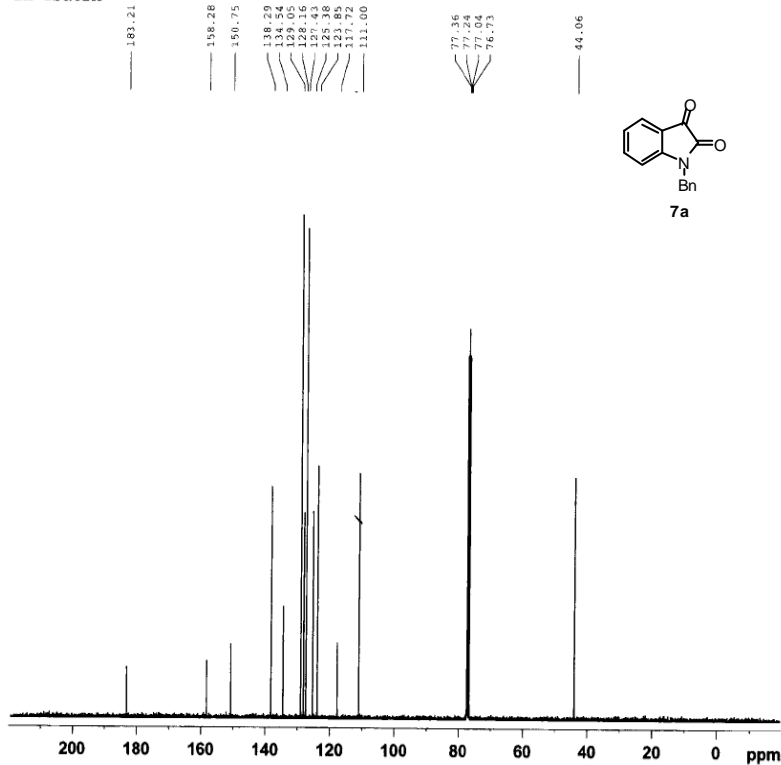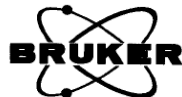

Current Data Parameters  
 NAME Dec06-2008-hayashi  
 EXPNO 120  
 PROCNO 1

F2 - Acquisition Parameters  
 Date\_ 20081206  
 Time 16.40  
 INSTRUM spect  
 PROBRD 5 mm PABBO BB-  
 PULPROG zgpg30  
 TD 65536  
 SOLVENT CDCl3  
 NS 300  
 DS 4  
 SWH 24038.461 Hz  
 FIDRES 0.366798 Hz  
 AQ 1.3631988 sec  
 RG 80.6  
 DW 20.800 usec  
 DE 6.00 usec  
 TE 302.9 K  
 D1 2.00000000 sec  
 d11 0.03000000 sec  
 DELTA 1.89999999 sec  
 TDO 1

===== CHANNEL f1 =====  
 NUC1 13C  
 P1 7.20 usec  
 PL1 -4.00 dB  
 SFO1 100.6354036 MHz

===== CHANNEL f2 =====  
 CPDPRG2 waltz16  
 NUC2 1H  
 PCPD2 80.00 usec  
 PL2 -4.00 dB  
 PL12 15.00 dB  
 PL13 15.00 dB  
 SFO2 400.1816007 MHz

F2 - Processing parameters  
 SI 32768  
 SF 100.6253448 MHz  
 WDW EM  
 SSB 0  
 LB 1.00 Hz  
 GB 0  
 PC 1.40

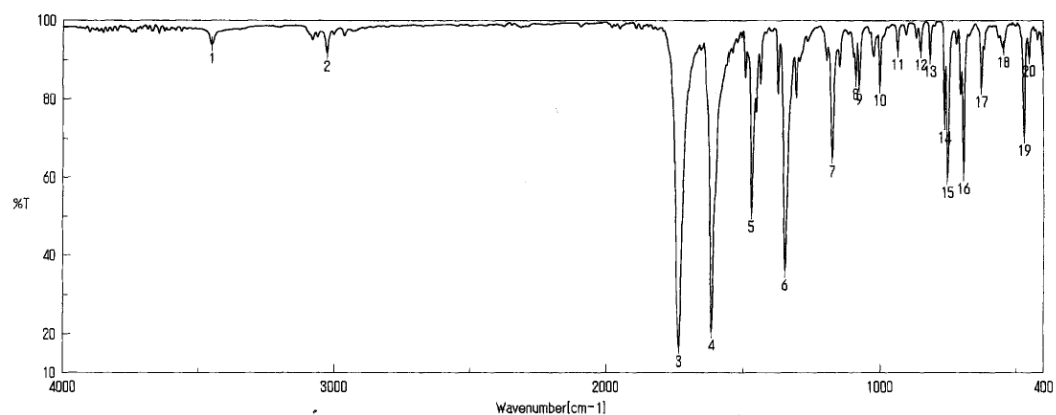

種算回数  
ゼロファイリング  
ゲイン  
日時  
測定者  
ファイル名  
サンプル名  
コメント

64  
ON  
2  
109/01/03 15:25  
Brisatin. JWS  
background

分解  
アポダイゼーション  
スキャンスピード

4 cm-1  
Cosine  
2 mm/sec

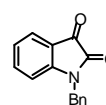

7a

|                     |                      |                     |                     |
|---------------------|----------------------|---------------------|---------------------|
| 1: 3453.88, 94.0413 | 2: 3029.62, 91.9169  | 3: 1731.76, 16.4638 | 4: 1613.16, 20.6778 |
| 5: 1471.42, 50.9012 | 6: 1348.96, 36.1033  | 7: 1177.33, 65.0943 | 8: 1091.51, 64.8911 |
| 9: 1078.01, 83.6301 | 10: 1003.77, 83.4161 | 11: 938.20, 92.4271 | 12: 853.35, 92.3515 |
| 13: 818.63, 90.5934 | 14: 765.60, 73.8559  | 15: 754.03, 59.8688 | 16: 694.25, 60.7783 |
| 17: 627.72, 82.9286 | 18: 547.68, 93.0124  | 19: 471.51, 70.6046 | 20: 453.19, 90.6829 |

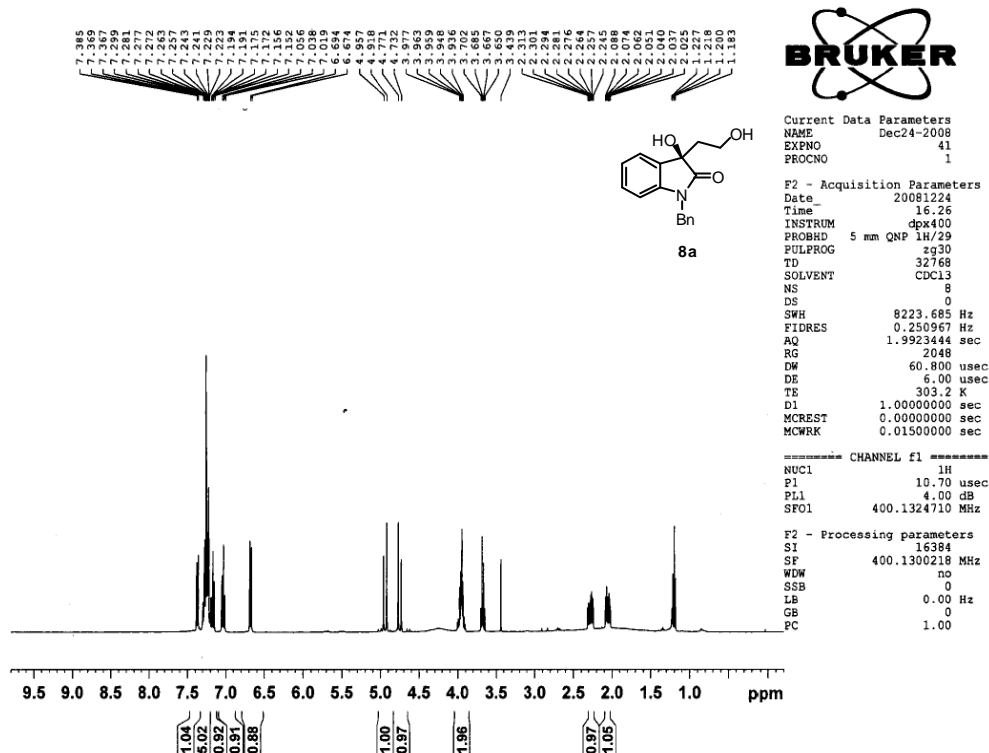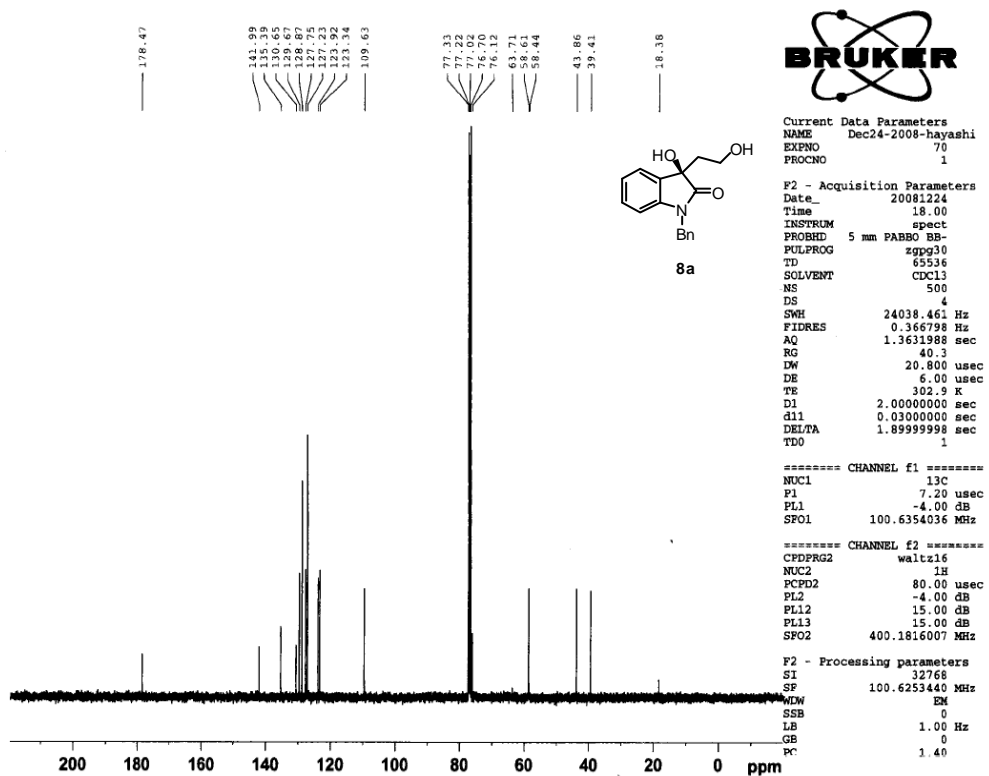

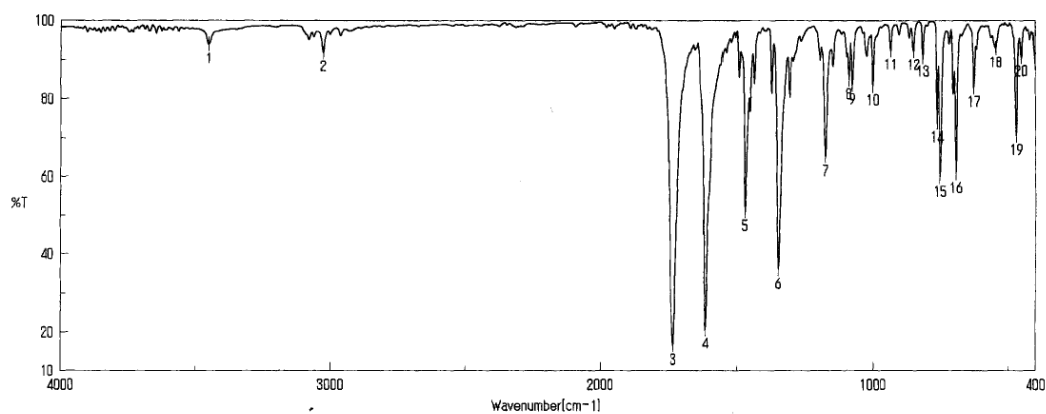

積算回数  
ゼロフィリング  
ゲイン  
日時  
測定者  
ファイル名  
サンプル名  
コメント

64  
ON  
2  
109/01/03 15:25  
Bnisatin, JWS  
background

分解  
アボダイゼーション  
スキャンスピード

4 cm⁻¹  
Cosine  
2 mm/sec

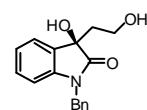

8a

|                     |                      |                     |                     |
|---------------------|----------------------|---------------------|---------------------|
| 1: 3453.88, 94.0413 | 2: 3029.62, 91.9189  | 3: 1731.76, 18.4638 | 4: 1613.16, 20.6778 |
| 5: 1471.42, 50.9012 | 6: 1348.96, 36.1033  | 7: 1177.33, 65.0943 | 8: 1091.51, 84.8911 |
| 9: 1078.01, 83.8301 | 10: 1003.77, 83.4161 | 11: 938.20, 92.4271 | 12: 853.35, 92.3515 |
| 13: 818.83, 90.5934 | 14: 765.60, 73.8559  | 15: 754.03, 59.8688 | 16: 694.25, 60.7783 |
| 17: 627.72, 82.9286 | 18: 547.68, 93.0124  | 19: 471.51, 70.6046 | 20: 453.19, 90.6829 |

7.585 7.586 7.587 7.588 7.589 7.590 7.591 7.592 7.593 7.594 7.595 7.596

7.585 7.586 7.587 7.588 7.589 7.590 7.591 7.592 7.593 7.594 7.595 7.596

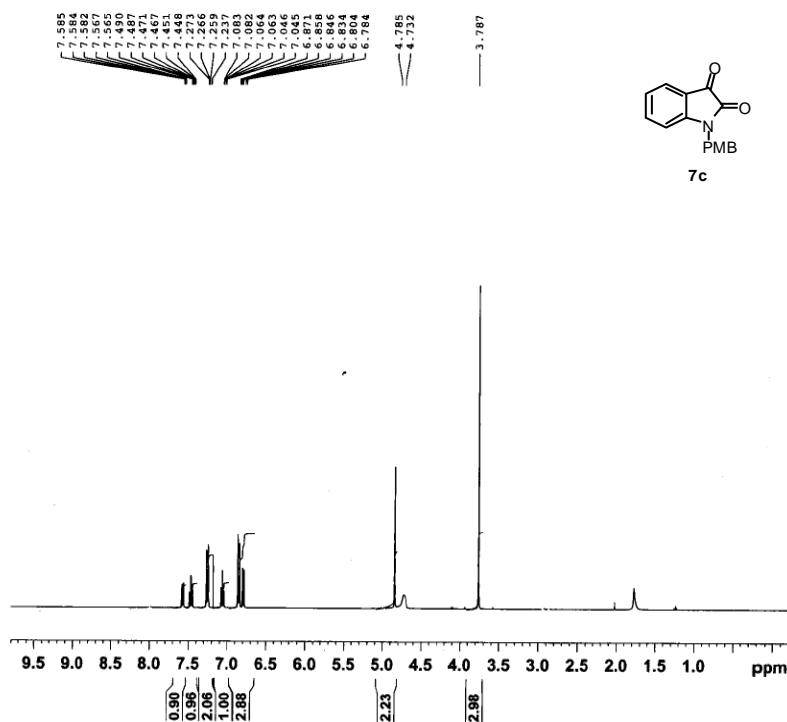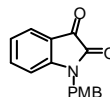

```
Current Data Parameters
NAME      Dec06-2008-hayashi
EXPNO          90
PROCNO        1
```

```

F2 - Acquisition Parameters
Date_      200812206
Time       11.52
INSTRUM    spect
PROBHD     5 mm PABBO BB-
PULPROG    zg30
TD          65536
SOLVENT     CDCl3
NS          16
DS          2
SWH         8223.685      Hz
FIDRES     0.125483      Hz
AQ          3.9846387    sec
RG          80.6
DE         60.800        usec
TE         5.00          usec
TW         303.0        K
D1         1.00000000    sec
TD0        1

```

```
===== CHANNEL f1 =====  
NUC1                1H  
P1                  12.00 usec  
PL1                 -4.00 dB  
SFO1               400.1824713 MHz
```

```
F2 - Processing parameters
SI              32768
SF             400.1800078 MHz
WDW             EM
SSB              0
LB              0.30 Hz
GB              0
PC              1.00
```

PMB-isatin

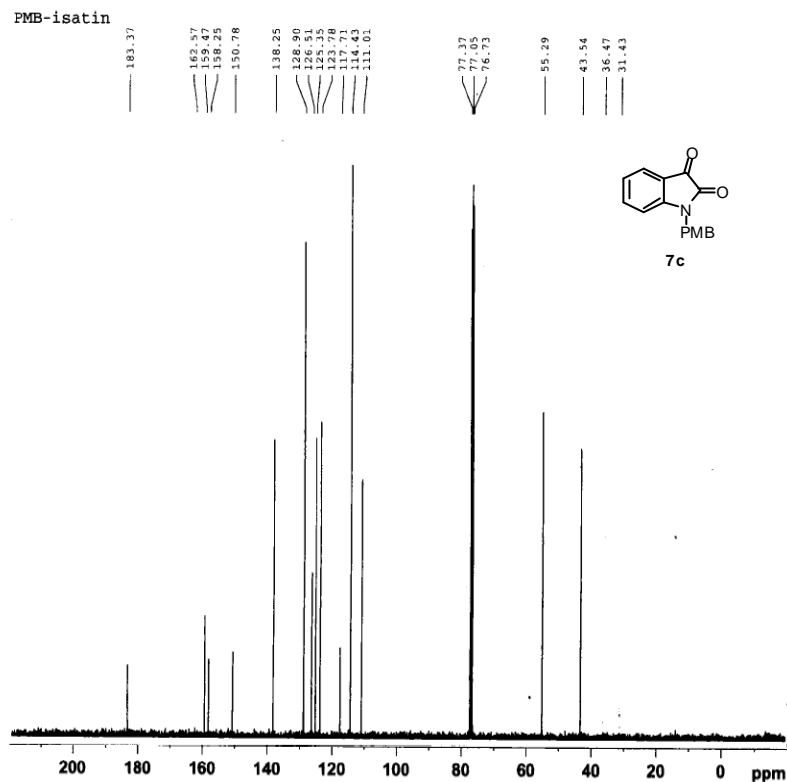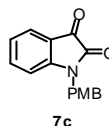

```
Current Data Parameters
NAME      Dec06-2008-hayashi
EXPNO      130
PROCNO     1
```

```

P2 - Acquisition Parameters
Date_          20081206
Time_          17.05
INSTRUM        5 mm PABBO BB-
PROBHD         spect
PULPROG        zgpg30
TD             65536
AQ             CDC13
SOLVENT        300
NS             4
DS             24038.461 Hz
SWH            0.366798 Hz
FIDRES        1.363198 sec
AQ           RG 40.3
DW            20.800 usec
DE            6.00 usec
TE           302.9 K
D1            2.0000000 sec
t1            0.0300000 sec
DELTA         1.6999999 sec
TD0           1

```

```
===== CHANNEL f1 =====
NUC1                13C
P1                  7.20 usec
PL1                 -4.00 dB
SFO1               100.6354036 MHz
```

```
===== CHANNEL f2 =====
CPDPRG2          waltz16
NUC2              1H
PCPD2             80.00 usec
PL2              -4.00 dB
PL12             15.00 dB
PL13             15.00 dB
SFO2             400.1816007 MHz
```

```
F2 - Processing parameters
SI              32768
SF              100.6253410 MHz
WDW             EM
SSB             0
LB              1.00 Hz
GB              0
PC              1.40
```



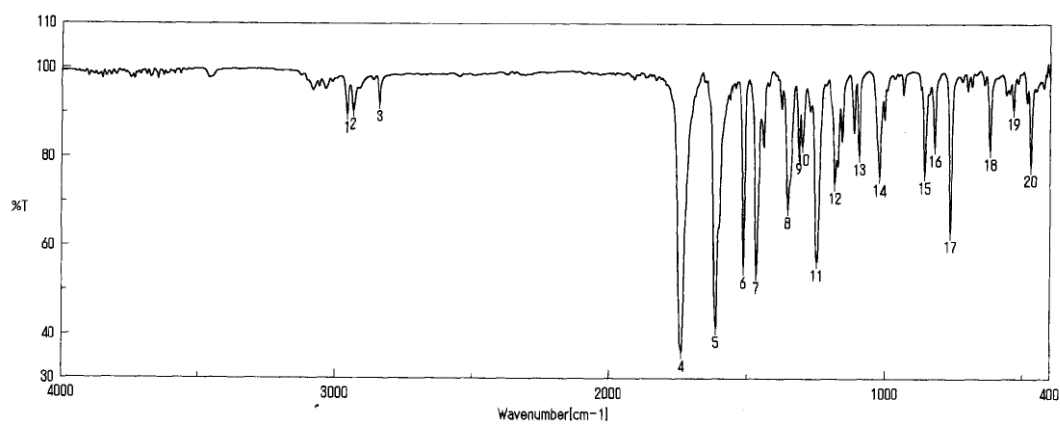

積算回数  
ゼロファイリング  
ゲイン  
日時  
測定者  
ファイル名  
サンプル名  
コメント

64  
ON  
2  
109/01/03 15:22  
PMB isatin, JWS  
background

分解  
アポダイゼーション  
スキャンスピード

4 cm-1  
Cosine  
2 mm/sec

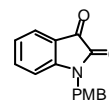

7c

|                      |                      |                      |                      |
|----------------------|----------------------|----------------------|----------------------|
| 1: 2980.20, 99.8313  | 2: 2936.09, 90.5909  | 3: 2840.63, 92.4719  | 4: 1735.62, 36.1058  |
| 5: 1610.27, 41.5858  | 6: 1513.85, 55.0553  | 7: 1487.56, 53.8085  | 8: 1353.78, 59.4944  |
| 9: 1314.25, 80.8667  | 10: 1299.79, 82.8880 | 11: 1248.66, 56.8697 | 12: 1182.15, 74.1755 |
| 13: 1094.41, 80.6432 | 14: 1021.12, 75.9802 | 15: 856.24, 76.5139  | 16: 819.60, 82.5785  |
| 17: 762.71, 63.2523  | 18: 618.07, 81.7643  | 19: 533.22, 90.9339  | 20: 470.55, 78.0972  |

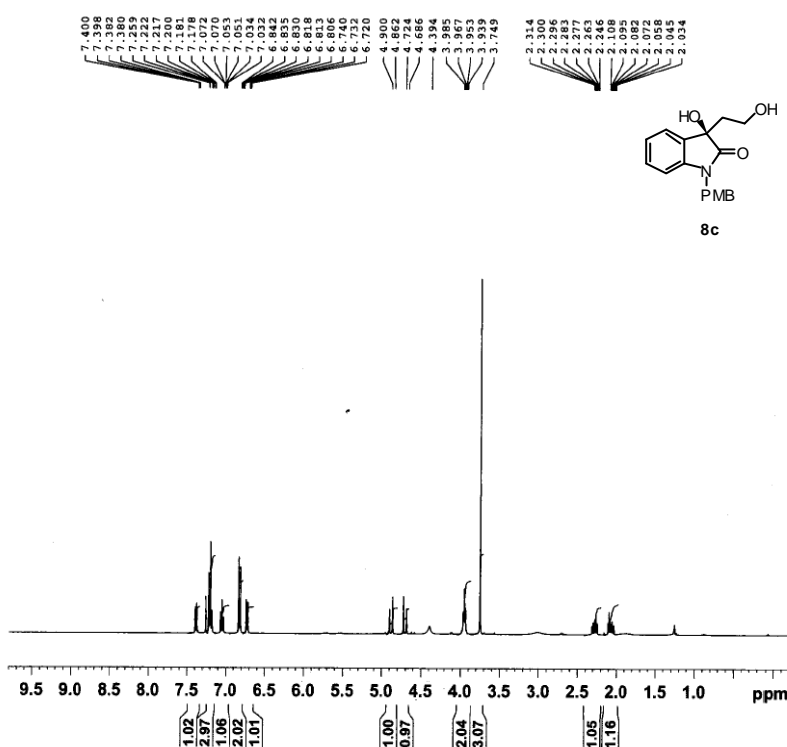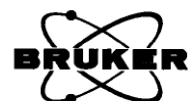

Current Data Parameters  
 NAME Dec18-2008-hayashi  
 EXPNO 50  
 PROCNO 1

F2 - Acquisition Parameters  
 Date\_ 20081218  
 Time 16.01  
 INSTRUM spect  
 PROBHD 5 mm PABBO BB-  
 PULPROG zg30  
 TD 65536  
 SOLVENT CDCl3  
 NS 16  
 DS 2  
 SWH 8223.685 Hz  
 FIDRES 0.125483 Hz  
 AQ 3.9846387 sec  
 RG 144  
 DW 60.800 usec  
 DE 6.00 usec  
 TE 303.0 K  
 D1 1.00000000 sec  
 TDO 1

===== CHANNEL f1 =====  
 NUC1 1H  
 P1 12.00 usec  
 PL1 -4.00 dB  
 SFO1 400.1824713 MHz

F2 - Processing parameters  
 SI 32768  
 SF 400.1800079 MHz  
 WDW EM  
 SSB 0  
 LB 0.30 Hz  
 GB 0  
 PC 1.00

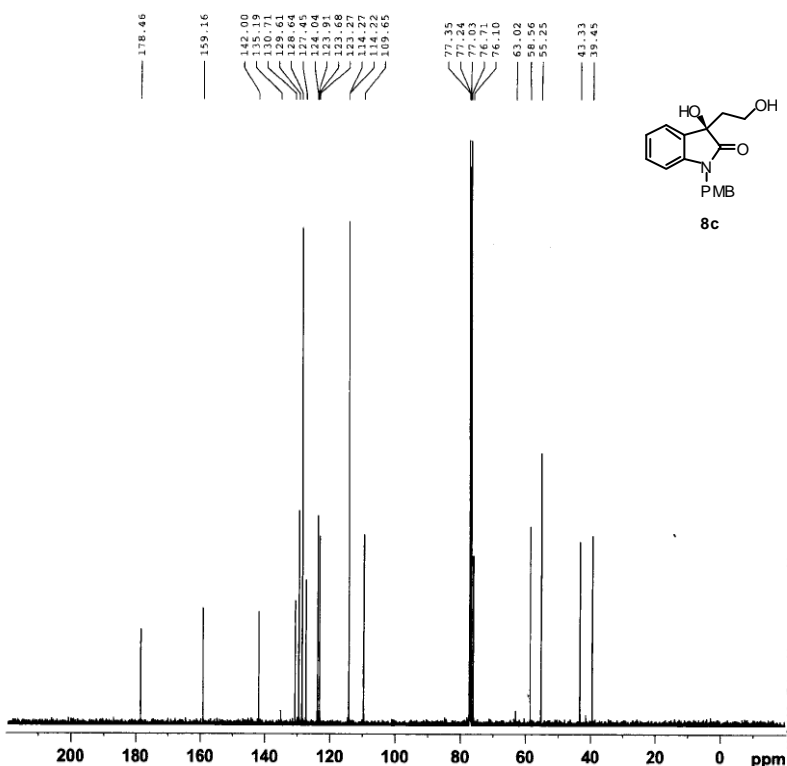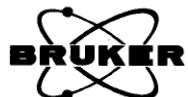

Current Data Parameters  
 NAME Dec18-2008-hayashi  
 EXPNO 51  
 PROCNO 1

F2 - Acquisition Parameters  
 Date\_ 20081218  
 Time 16.32  
 INSTRUM spect  
 PROBHD 5 mm PABBO BB-  
 PULPROG zgpg30  
 TD 65536  
 SOLVENT CDCl3  
 NS 500  
 DS 4  
 SWH 24038.461 Hz  
 FIDRES 0.366798 Hz  
 AQ 1.3631986 sec  
 RG 40.3  
 DW 20.800 usec  
 DE 6.00 usec  
 TE 302.9 K  
 D1 2.00000000 sec  
 d11 0.03000000 sec  
 DELTA 1.89999998 sec  
 TDO 1

===== CHANNEL f1 =====  
 NUC1 13C  
 P1 7.20 usec  
 PL1 -4.00 dB  
 SFO1 100.6354036 MHz

===== CHANNEL f2 =====  
 CPDPRG2 waltz16  
 NUC2 1H  
 PCPD2 80.00 usec  
 PL2 -4.00 dB  
 PL12 15.00 dB  
 PL13 15.00 dB  
 SFO2 400.1816007 MHz

F2 - Processing parameters  
 SI 32768  
 SF 100.6253437 MHz  
 WDW EM  
 SSB 0  
 LB 1.00 Hz  
 GB 0  
 PC 1.40

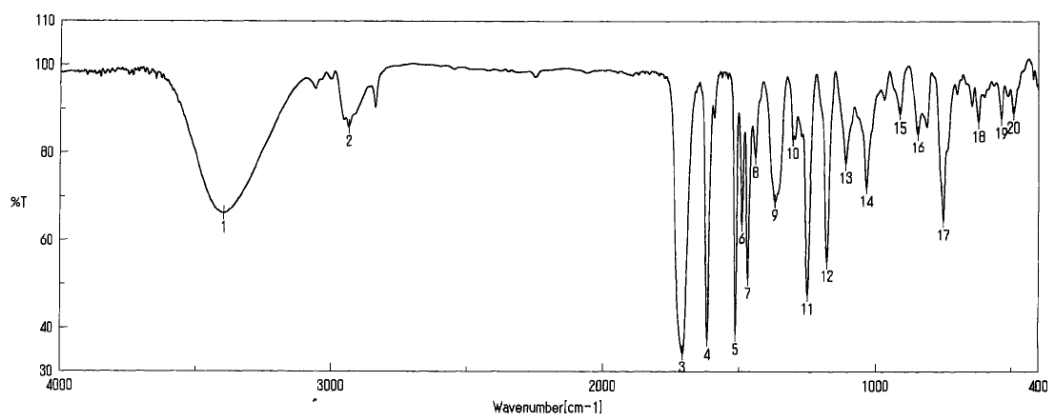

積算回数  
ゼロフィリング  
ゲイン  
日時  
測定者  
ファイル名  
サンプル名  
コメント

23  
ON  
2  
108/12/24 18:53  
Memory#7  
background

分解  
アポダイゼーション  
スキャンスピード

4 cm⁻¹  
Cosine  
2 mm/sec

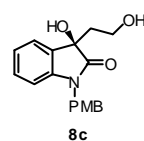

|                      |                      |                      |                      |
|----------------------|----------------------|----------------------|----------------------|
| 1: 3395.07, 66.2394  | 2: 2933.20, 86.0409  | 3: 1704.76, 34.3685  | 4: 1614.13, 37.2696  |
| 5: 1513.85, 38.4710  | 6: 1487.81, 63.7787  | 7: 1467.56, 51.2527  | 8: 1439.60, 78.9403  |
| 9: 1367.28, 69.1035  | 10: 1302.68, 63.2122 | 11: 1248.68, 47.7100 | 12: 1176.36, 55.1991 |
| 13: 1108.87, 77.7164 | 14: 1032.69, 72.3730 | 15: 910.24, 89.0698  | 16: 843.70, 84.6343  |
| 17: 751.14, 64.6205  | 18: 620.00, 87.1546  | 19: 537.06, 87.8828  | 20: 490.79, 99.1436  |

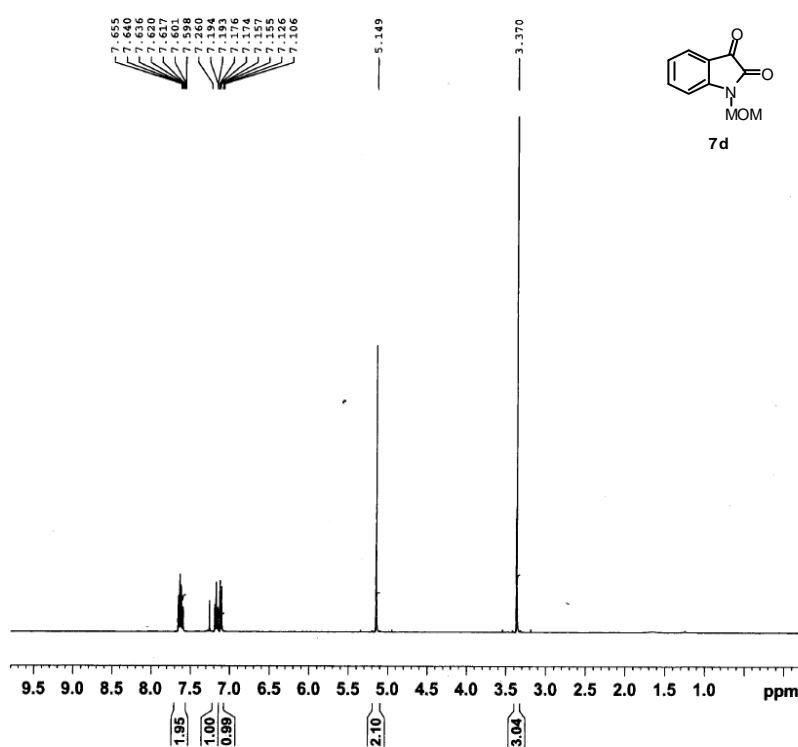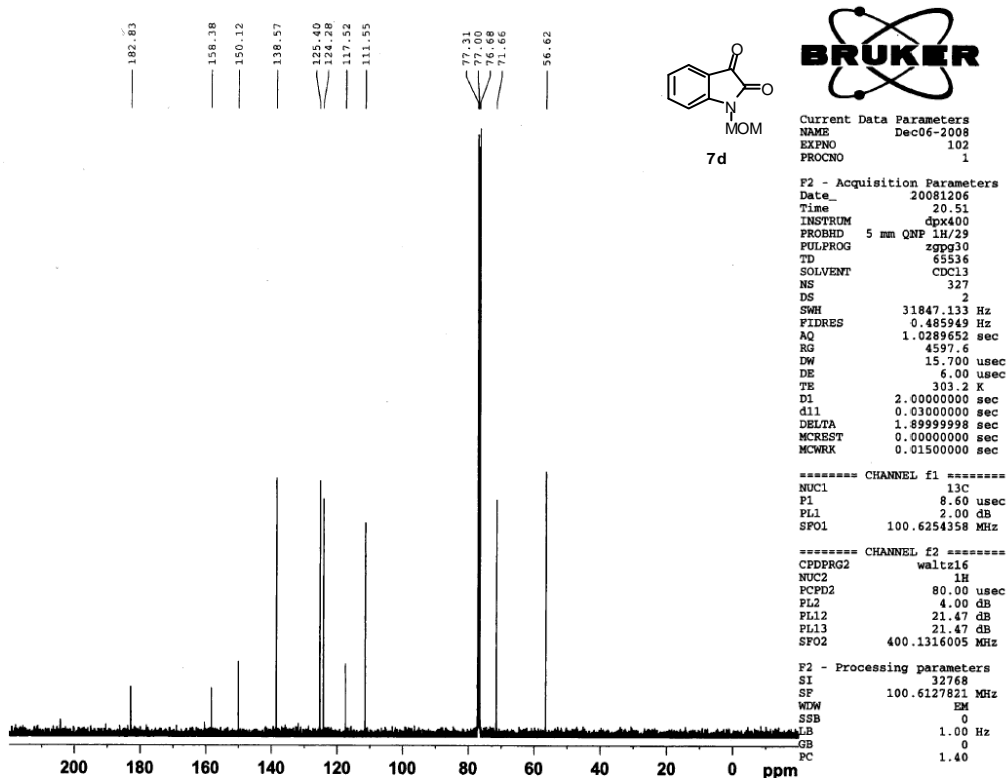

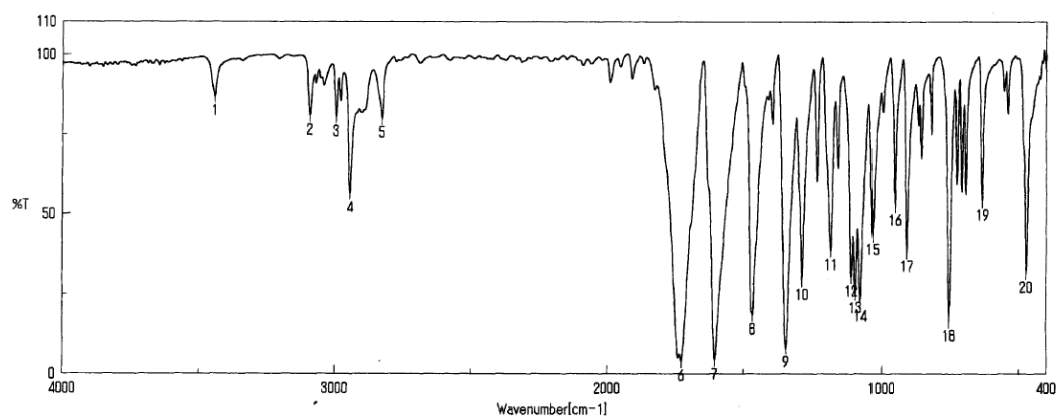

積算回数  
ゼロフィリング  
ゲイン  
日時  
測定者  
ファイル名  
サンプル名  
コメント

64  
ON  
4  
108/01/03 15:11  
MOMisatin. JWS  
background

分解  
アポダイゼーション  
スキャンスピード

4 cm-1  
Cosine  
2 mm/sec

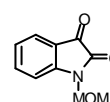

7d

|                      |                      |                      |                      |
|----------------------|----------------------|----------------------|----------------------|
| 1: 3443.28, 86.8512  | 2: 3094.23, 80.9017  | 3: 2996.84, 80.4734  | 4: 2944.77, 56.6455  |
| 5: 2828.10, 80.0723  | 6: 1726.94, 4.0359   | 7: 1605.45, 4.4528   | 8: 1487.58, 18.5314  |
| 9: 1346.07, 8.2906   | 10: 1287.25, 29.5032 | 11: 1183.11, 38.7052 | 12: 1108.87, 30.5332 |
| 13: 1094.41, 25.3041 | 14: 1076.08, 22.6380 | 15: 1031.73, 43.4538 | 16: 952.66, 52.6008  |
| 17: 910.24, 38.1401  | 18: 755.96, 16.5387  | 19: 634.47, 54.1929  | 20: 472.47, 31.7685  |

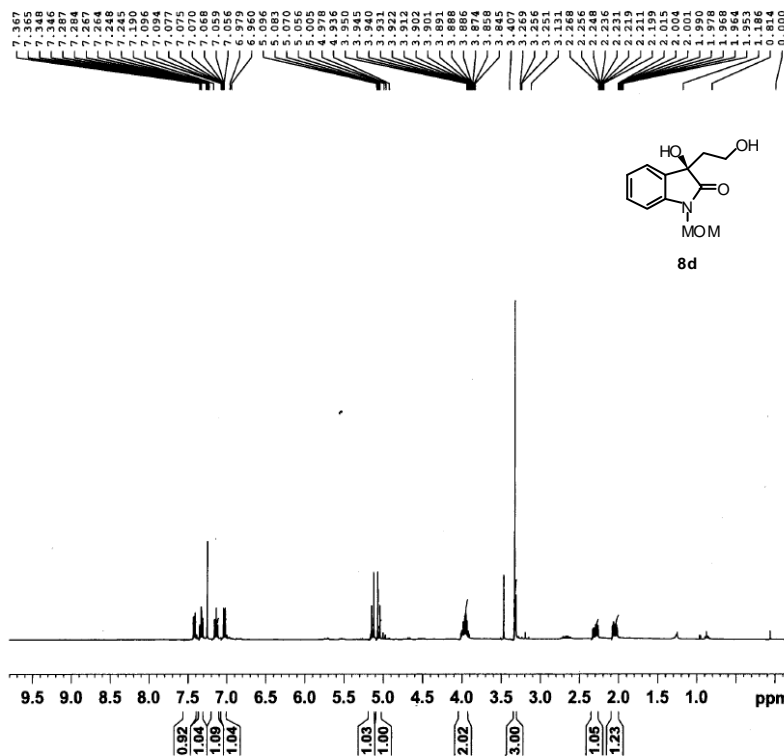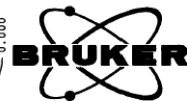

Current Data Parameters  
 NAME Dec17-2008-hayashi  
 EXPNO 53  
 PROCNO 1

F2 - Acquisition Parameters  
 Date\_ 20081217  
 Time 11.53  
 INSTRUM spect  
 PROBRD 5 mm PABBO BB-  
 PULPROG zg30  
 TD 65536  
 SOLVENT CDCl3  
 NS 32  
 DS 2  
 SWH 8223.685 Hz  
 FIDRES 0.125483 Hz  
 AQ 3.9846387 sec  
 RG 256  
 DW 60.800 usec  
 DE 6.00 usec  
 TE 303.0 K  
 D1 1.00000000 sec  
 TD0 1

===== CHANNEL f1 =====  
 NUC1 1H  
 P1 12.00 usec  
 PL1 -4.00 dB  
 SFO1 400.1824713 MHz

F2 - Processing parameters  
 SI 32768  
 SF 400.1800092 MHz  
 WDW EM  
 SSB 0  
 LB 0.30 Hz  
 GB 0  
 PC 1.00

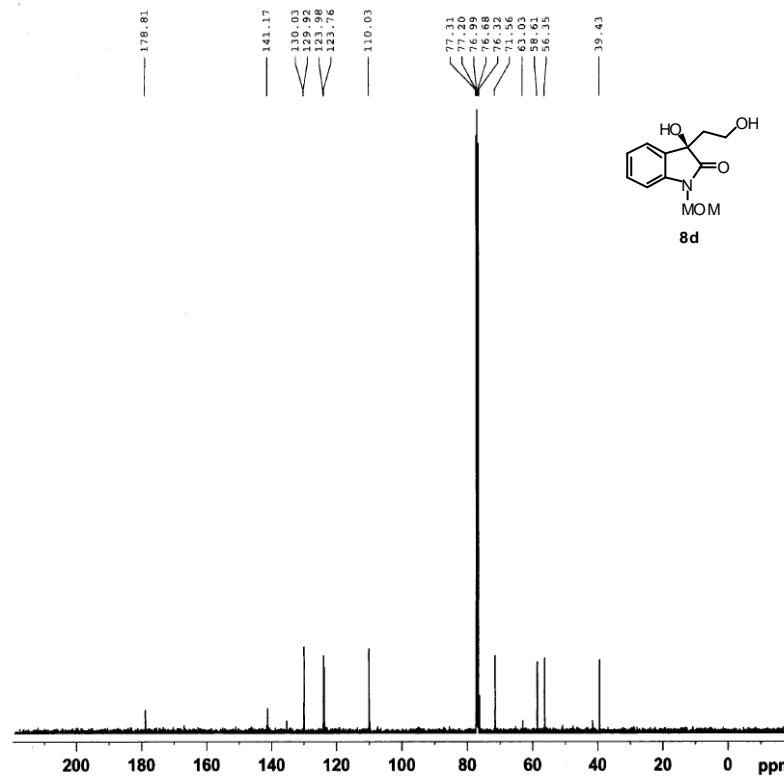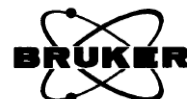

Current Data Parameters  
 NAME Dec17-2008-hayashi  
 EXPNO 54  
 PROCNO 1

F2 - Acquisition Parameters  
 Date\_ 20081217  
 Time 12.23  
 INSTRUM spect  
 PROBRD 5 mm PABBO BB-  
 PULPROG zgpg30  
 TD 65536  
 SOLVENT CDCl3  
 NS 500  
 DS 4  
 SWH 24038.461 Hz  
 FIDRES 0.366798 Hz  
 AQ 1.3631988 sec  
 RG 114  
 DW 20.800 usec  
 DE 6.00 usec  
 TE 302.9 K  
 D1 2.00000000 sec  
 d11 0.03000000 sec  
 DELTA 1.89999998 sec  
 TD0 1

===== CHANNEL f1 =====  
 NUC1 13C  
 P1 7.20 usec  
 PL1 -4.00 dB  
 SFO1 100.6354036 MHz

===== CHANNEL f2 =====  
 CPDPRG2 waltz16  
 NUC2 1H  
 PCPD2 80.00 usec  
 PL2 -4.00 dB  
 PL12 15.00 dB  
 PL13 15.00 dB  
 SFO2 400.1816007 MHz

F2 - Processing parameters  
 SI 32768  
 SF 100.6253424 MHz  
 WDW EM  
 SSB 0  
 LB 1.00 Hz  
 GB 0  
 PC 1.40

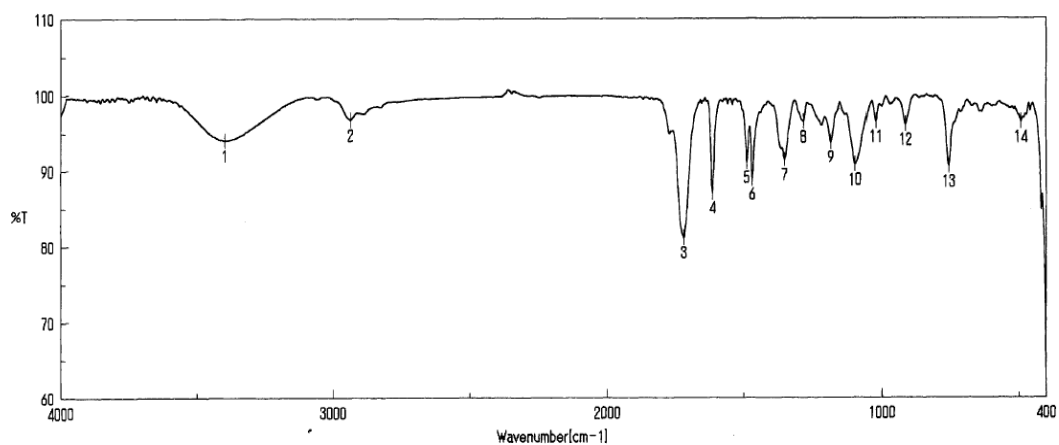

積算回数  
ゼロファイリング  
ゲイン  
日時  
測定者  
ファイル名  
サンプル名  
コメント

21  
ON  
2  
108/12/24 18:34  
Memory#3  
background

分解  
アボダイゼーション  
スキャンスピード

4 cm⁻¹  
Cosine  
2 mm/sec

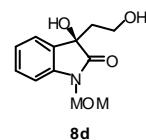

|                     |                      |                      |                     |
|---------------------|----------------------|----------------------|---------------------|
| 1: 3399.89, 94.0082 | 2: 2936.09, 96.7471  | 3: 1718.26, 81.1851  | 4: 1614.13, 87.1222 |
| 5: 1487.81, 91.1412 | 6: 1468.53, 88.9544  | 7: 1350.89, 91.4164  | 8: 1281.47, 96.4765 |
| 9: 1182.15, 93.7824 | 10: 1094.41, 90.8186 | 11: 1021.12, 96.5099 | 12: 913.13, 96.1381 |
| 13: 755.96, 90.5991 | 14: 492.72, 96.4407  |                      |                     |

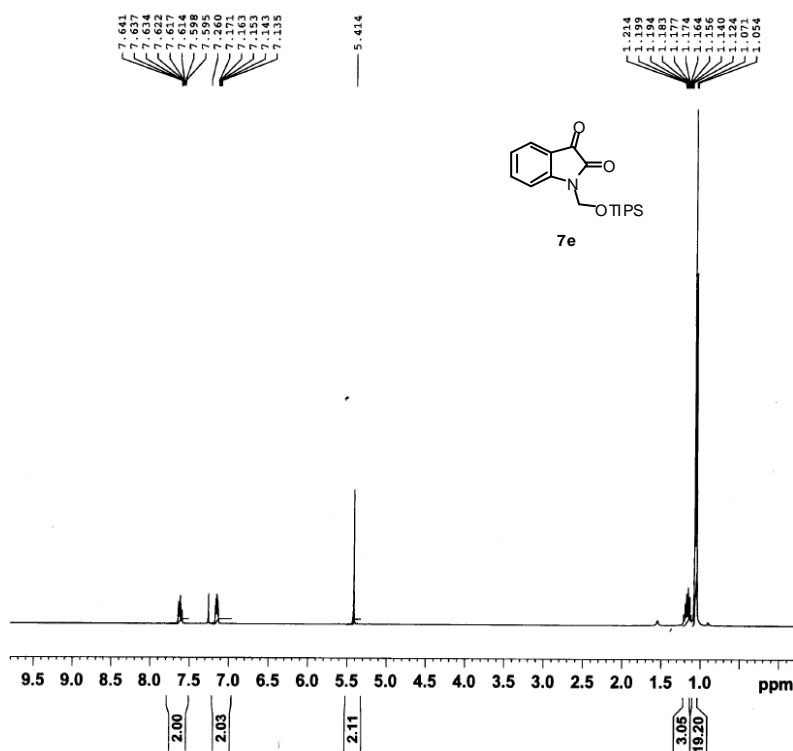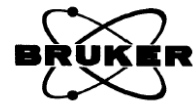

Current Data Parameters  
NAME Dec17-2008-hayashi  
EXPNO 30  
PROCNO 1

F2 - Acquisition Parameters  
Date\_ 20081217  
Time 10.32  
INSTRUM spect  
PROBHD 5 mm PABBO BB-  
PULPROG zg30  
TD 65536  
SOLVENT CDC13  
NS 32  
DS 2  
SWH 8223.685 Hz  
FIDRES 0.125483 Hz  
AQ 3.9846387 sec  
RG 161  
DW 60.800 usec  
DE 6.00 usec  
TE 303.0 K  
D1 1.0000000 sec  
TDO 1

===== CHANNEL f1 =====  
NUC1 1H  
P1 12.00 usec  
PL1 -4.00 dB  
SFO1 400.1824713 MHz

F2 - Processing parameters  
SI 32768  
SF 400.1800075 MHz  
WDW EM  
SSB 0  
LB 0.30 Hz  
GB 0  
PC 1.00

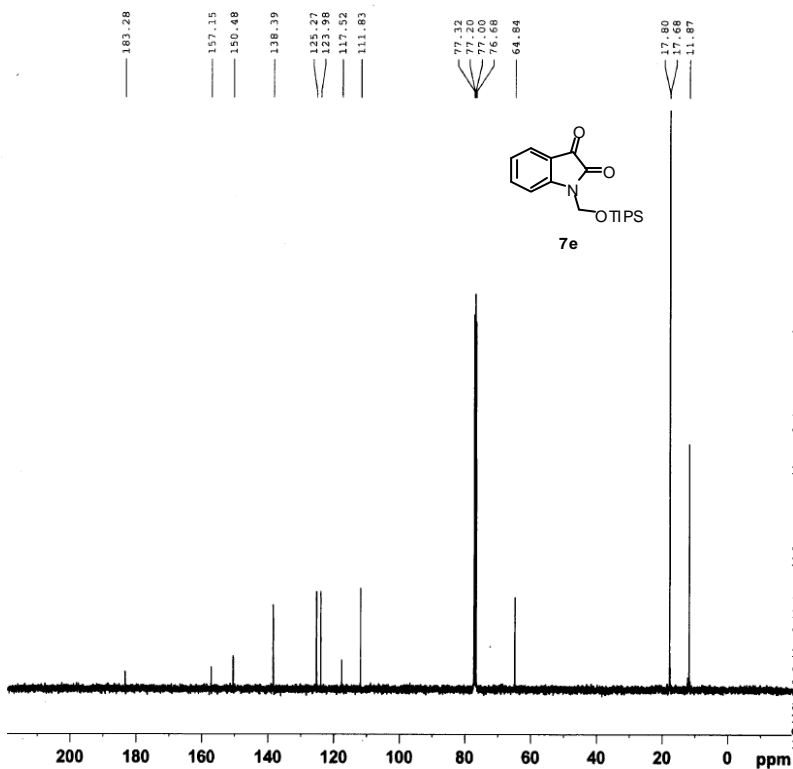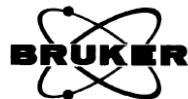

Current Data Parameters  
NAME Dec17-2008-hayashi  
EXPNO 31  
PROCNO 1

F2 - Acquisition Parameters  
Date\_ 20081217  
Time 10.51  
INSTRUM spect  
PROBHD 5 mm PABBO BB-  
PULPROG zgpg30  
TD 65536  
SOLVENT CDC13  
NS 300  
DS 4  
SWH 24038.461 Hz  
FIDRES 0.366798 Hz  
AQ 1.3631988 sec  
RG 203  
DW 20.800 usec  
DE 6.00 usec  
TE 302.9 K  
D1 2.0000000 sec  
d11 0.0300000 sec  
DELTA 1.89999998 sec  
TDO 1

===== CHANNEL f1 =====  
NUC1 13C  
P1 7.20 usec  
PL1 -4.00 dB  
SFO1 100.6354036 MHz

===== CHANNEL f2 =====  
CPDPRG2 waltz16  
NUC2 1H  
PCPD2 80.00 usec  
PL2 -4.00 dB  
PL12 15.00 dB  
PL13 15.00 dB  
SFO2 400.1816007 MHz

F2 - Processing parameters  
SI 32768  
SF 100.6253420 MHz  
WDW EM  
SSB 0  
LB 1.00 Hz  
GB 0  
PC 1.40



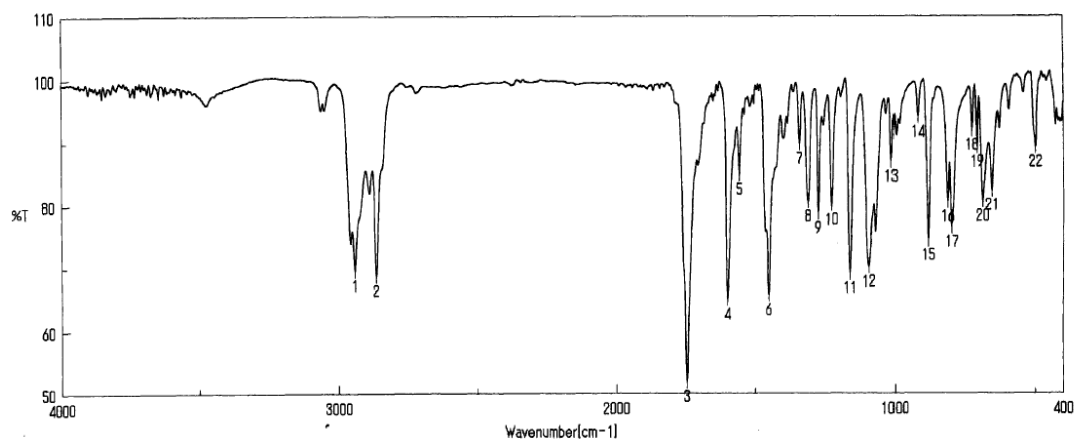

積算回数  
ゼロフィリング  
ゲイン  
日時  
測定者  
ファイル名  
サンプル名  
コメント

23  
ON  
2  
108/12/24 19:06  
Memory#11  
background

分解  
アポダイゼーション  
スキャンスピード

4 cm-1  
Cosine  
2 mm/sec

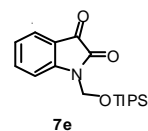

|                      |                      |                      |                      |
|----------------------|----------------------|----------------------|----------------------|
| 1: 2941.68, 68.6614  | 2: 2885.70, 68.8611  | 3: 1746.23, 51.9457  | 4: 1600.63, 65.0892  |
| 5: 1559.17, 85.0539  | 6: 1452.14, 65.7717  | 7: 1343.18, 89.8150  | 8: 1311.36, 80.6876  |
| 9: 1274.72, 78.8715  | 10: 1226.51, 80.1445 | 11: 1159.97, 69.2797 | 12: 1082.48, 70.2863 |
| 13: 1013.41, 87.0269 | 14: 919.86, 94.1106  | 15: 853.24, 74.5372  | 16: 812.85, 80.6181  |
| 17: 799.35, 76.6129  | 18: 726.07, 92.0652  | 19: 707.75, 89.3292  | 20: 688.46, 80.7240  |

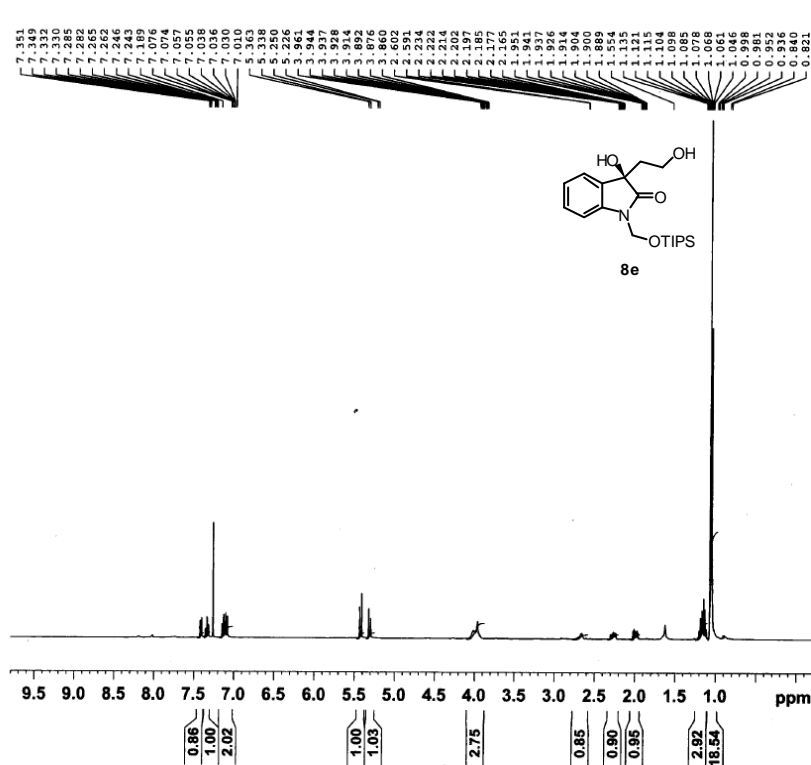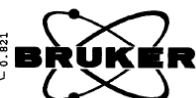

Current Data Parameters  
 NAME Dec26-2008-hayashi  
 EXPNO 10  
 PROCNO 1

F2 - Acquisition Parameters  
 Date\_ 20081226  
 Time 13.26  
 INSTRUM spect  
 PROBHD 5 mm PABBO BB-  
 PULPROG zg30  
 TD 65536  
 SOLVENT CDCl3  
 NS 16  
 DS 2  
 SWH 8223.685 Hz  
 FIDRES 0.125483 Hz  
 AQ 3.9846387 sec  
 RG 181  
 DW 60.800 usec  
 DE 5.00 usec  
 TE 303.0 K  
 D1 1.00000000 sec  
 TDO 1

===== CHANNEL f1 =====  
 NUC1 1H  
 P1 12.00 usec  
 PL1 -4.00 dB  
 SFO1 400.1824713 MHz

F2 - Processing parameters  
 SI 32768  
 SF 400.1800073 MHz  
 WDW EM  
 SSB 0  
 LB 0.30 Hz  
 GB 0  
 PC 1.00

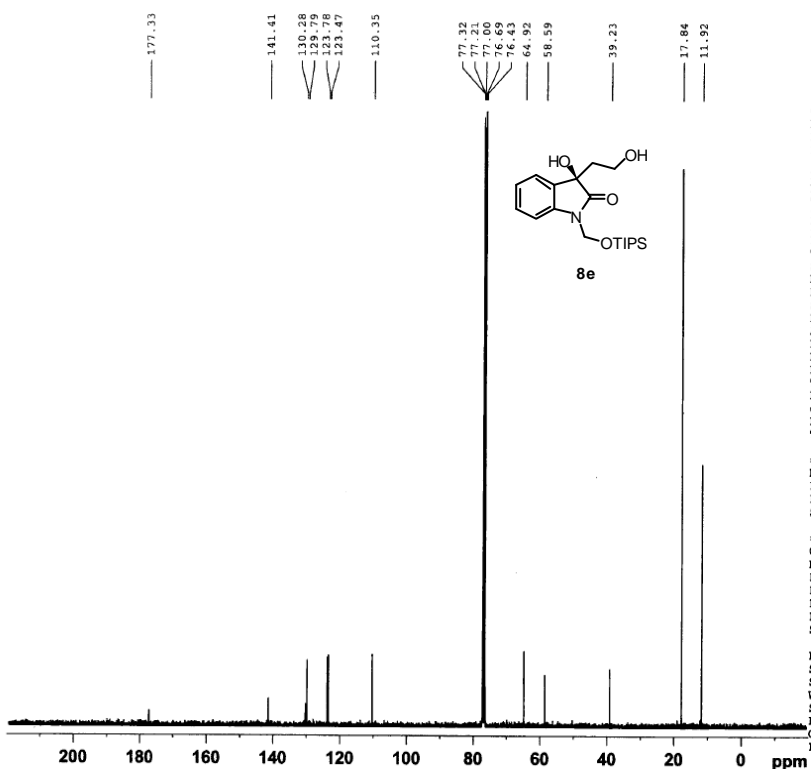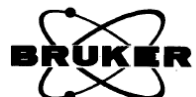

Current Data Parameters  
 NAME Dec26-2008-hayashi  
 EXPNO 11  
 PROCNO 1

F2 - Acquisition Parameters  
 Date\_ 20081226  
 Time 13.57  
 INSTRUM spect  
 PROBHD 5 mm PABBO BB-  
 PULPROG zgpg30  
 TD 65536  
 SOLVENT CDCl3  
 NS 500  
 DS 4  
 SWH 24038.461 Hz  
 FIDRES 0.366798 Hz  
 AQ 1.3631988 sec  
 RG 228  
 DW 20.800 usec  
 DE 6.00 usec  
 TE 302.9 K  
 D1 2.00000000 sec  
 d11 0.03000000 sec  
 DELTA 1.89999998 sec  
 TDO 1

===== CHANNEL f1 =====  
 NUC1 13C  
 P1 7.20 usec  
 PL1 -4.00 dB  
 SFO1 100.6354036 MHz

===== CHANNEL f2 =====  
 CPDPRG2 waltz16  
 NUC2 1H  
 PCPD2 80.00 usec  
 PL2 -4.00 dB  
 PL12 15.00 dB  
 PL13 15.00 dB  
 SFO2 400.1816007 MHz

F2 - Processing parameters  
 SI 32768  
 SF 100.6253435 MHz  
 WDW EM  
 SSB 0  
 LB 1.00 Hz  
 GB 0  
 PC 1.40

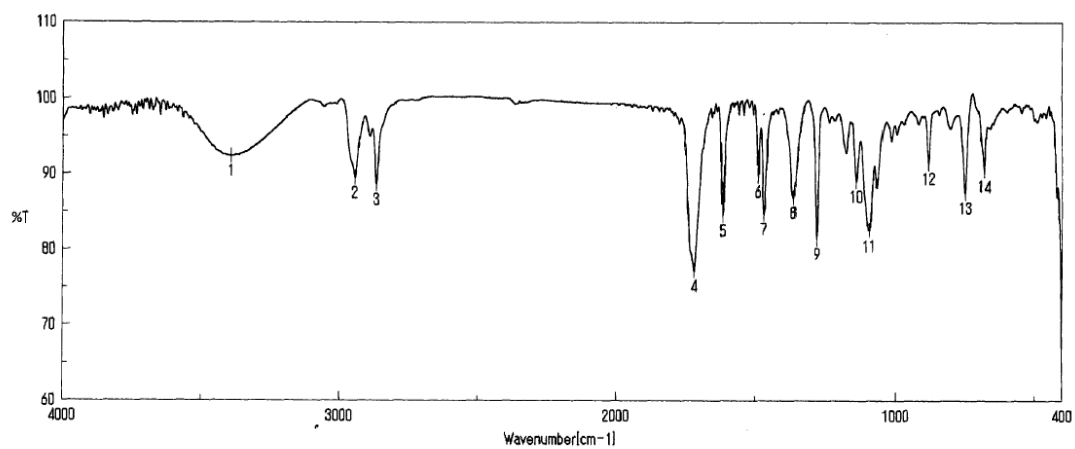

積算回数  
ゼロファイリング  
ゲイン  
日時  
測定者  
ファイル名  
サンプル名  
コメント

16  
ON  
1  
109/03/09 20:44  
Memory#5  
background

分解  
アボダイゼーション  
スキャンスピード

4 cm⁻¹  
Cosine  
2 mm/sec

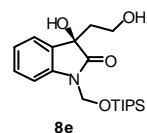

|             |         |              |         |              |         |             |         |
|-------------|---------|--------------|---------|--------------|---------|-------------|---------|
| 1: 3392.17, | 92.4051 | 2: 2944.77,  | 89.5829 | 3: 2886.67,  | 88.6778 | 4: 1718.26, | 77.2375 |
| 5: 1615.09, | 84.5267 | 6: 1468.78,  | 89.7725 | 7: 1469.49,  | 84.7470 | 8: 1364.39, | 86.9990 |
| 9: 1279.54, | 81.5174 | 10: 1139.72, | 89.1043 | 11: 1092.48, | 82.5320 | 12: 882.27, | 91.4709 |
| 13: 751.14, | 87.6203 | 14: 682.68,  | 90.4104 |              |         |             |         |

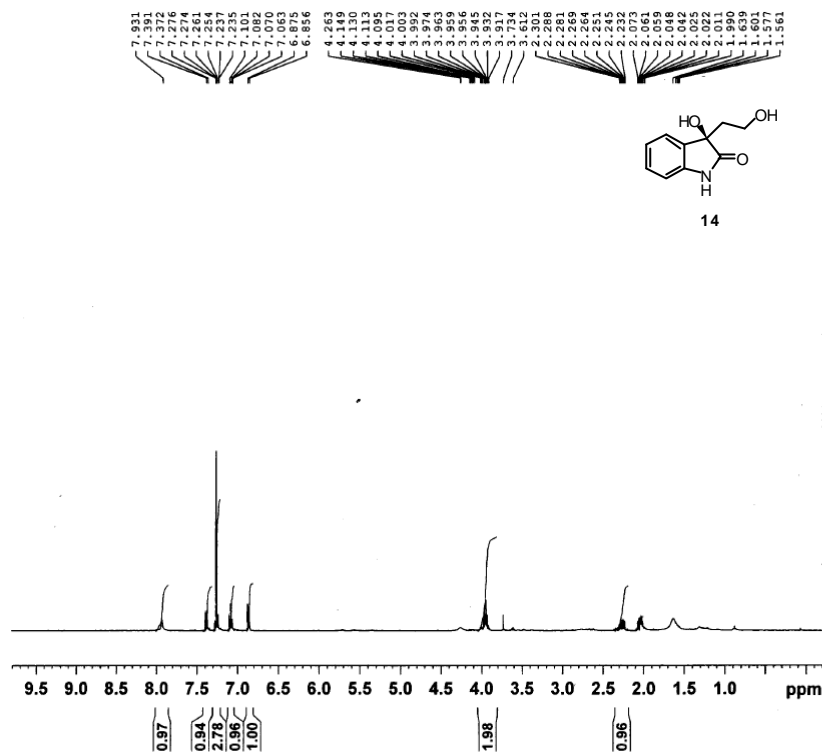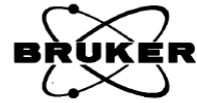

Current Data Parameters  
NAME Mar21-2009  
EXPNO 81  
PROCNO 1

F2 - Acquisition Parameters  
Date\_ 20090321  
Time 19.48  
INSTRUM dpx400  
PROBHD 5 mm QNP 1H/29  
PULPROG zg30  
TD 32768  
SOLVENT CDCl3  
NS 8  
DS 0  
SWH 8223.685 Hz  
FIDRES 0.250967 Hz  
AQ 1.9923444 sec  
RG 5160.6  
DW 60.800 usec  
DE 6.00 usec  
TE 303.2 K  
D1 1.00000000 sec  
MCREST 0.00000000 sec  
MCWRK 0.01500000 sec

===== CHANNEL f1 =====  
NUC1 1H  
P1 10.70 usec  
PL1 4.00 dB  
SFO1 400.1324710 MHz

F2 - Processing parameters  
SI 16384  
SF 400.1300092 MHz  
WDW no  
SSB 0  
LB 0.00 Hz  
GB 0  
PC 1.00

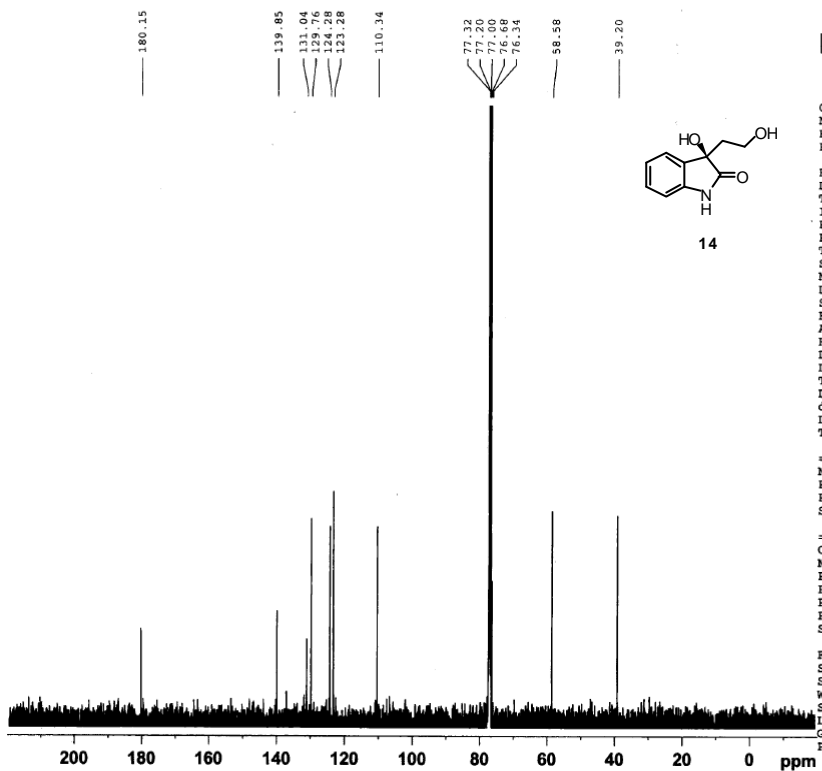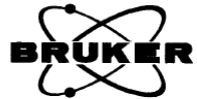

Current Data Parameters  
NAME Mar21-2009-hayashi  
EXPNO 110  
PROCNO 1

F2 - Acquisition Parameters  
Date\_ 20090321  
Time 21.52  
INSTRUM spect  
PROBHD 5 mm PABBO BB-  
PULPROG zgpg30  
TD 65536  
SOLVENT CDCl3  
NS 2000  
DS 4  
SWH 24038.461 Hz  
FIDRES 0.366798 Hz  
AQ 1.3631988 sec  
RG 114  
DW 20.800 usec  
DE 6.00 usec  
TE 302.9 K  
D1 2.00000000 sec  
d11 0.03000000 sec  
DELTA 1.89999998 sec  
TD0 1

===== CHANNEL f1 =====  
NUC1 13C  
P1 7.20 usec  
PL1 4.00 dB  
SFO1 100.6354036 MHz

===== CHANNEL f2 =====  
CPDPRG2 waltz16  
NUC2 1H  
PCPD2 80.00 usec  
PL2 -4.00 dB  
PL12 15.00 dB  
PL13 15.00 dB  
SFO2 400.1816007 MHz

F2 - Processing parameters  
SI 32768  
SF 100.6253405 MHz  
WDW EM  
SSB 0  
LB 1.00 Hz  
GB 0  
PC 1.40

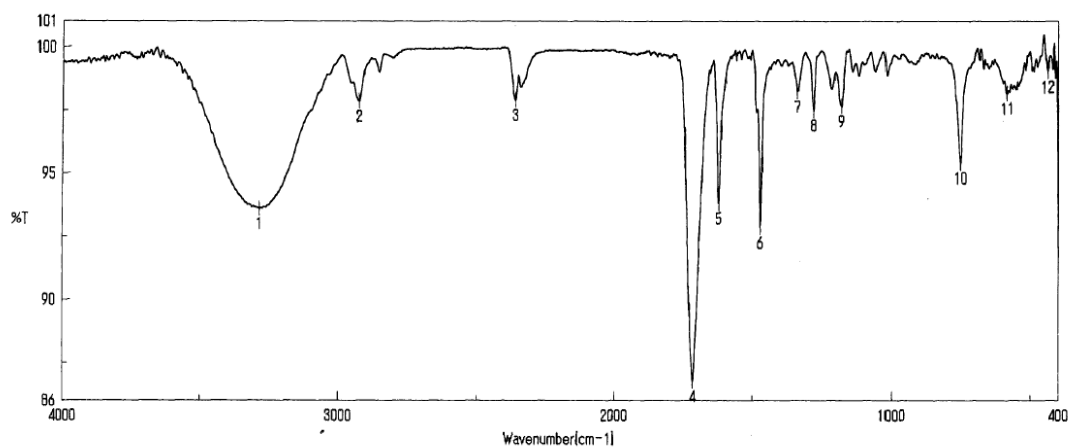

積算回数  
ゼロフィリング  
ゲイン  
日時  
測定者  
ファイル名  
サンプル名  
コメント

16  
ON  
1  
109/03/23 14:57  
Memory#3  
background

分解  
アポダイゼーション  
スキャンスピード

4 cm-1  
Cosine  
2 cm/sec

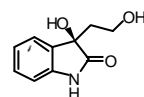

14

|                     |                     |                     |                     |
|---------------------|---------------------|---------------------|---------------------|
| 1: 3284.18, 93.6011 | 2: 2923.56, 97.8678 | 3: 2358.52, 97.9053 | 4: 1715.37, 86.7861 |
| 5: 1621.84, 93.8252 | 6: 1471.42, 92.8601 | 7: 1337.39, 98.2586 | 8: 1279.54, 97.5109 |
| 9: 1178.28, 97.6699 | 10: 753.07, 95.4080 | 11: 584.33, 98.1779 | 12: 437.76, 99.0196 |

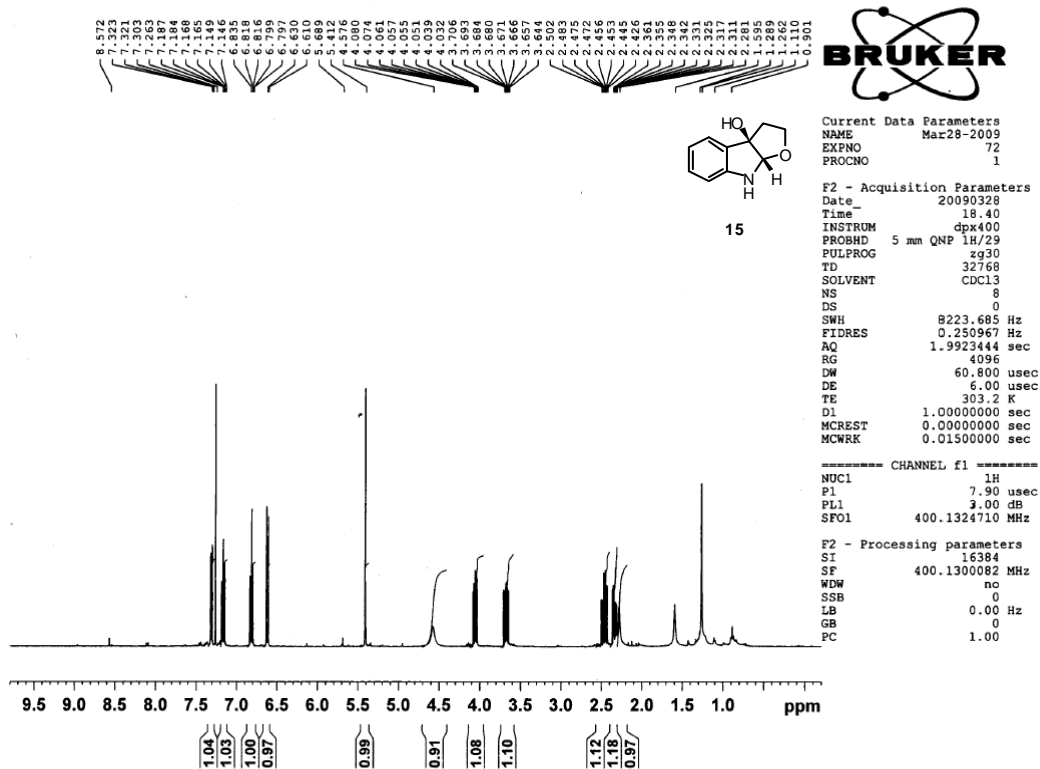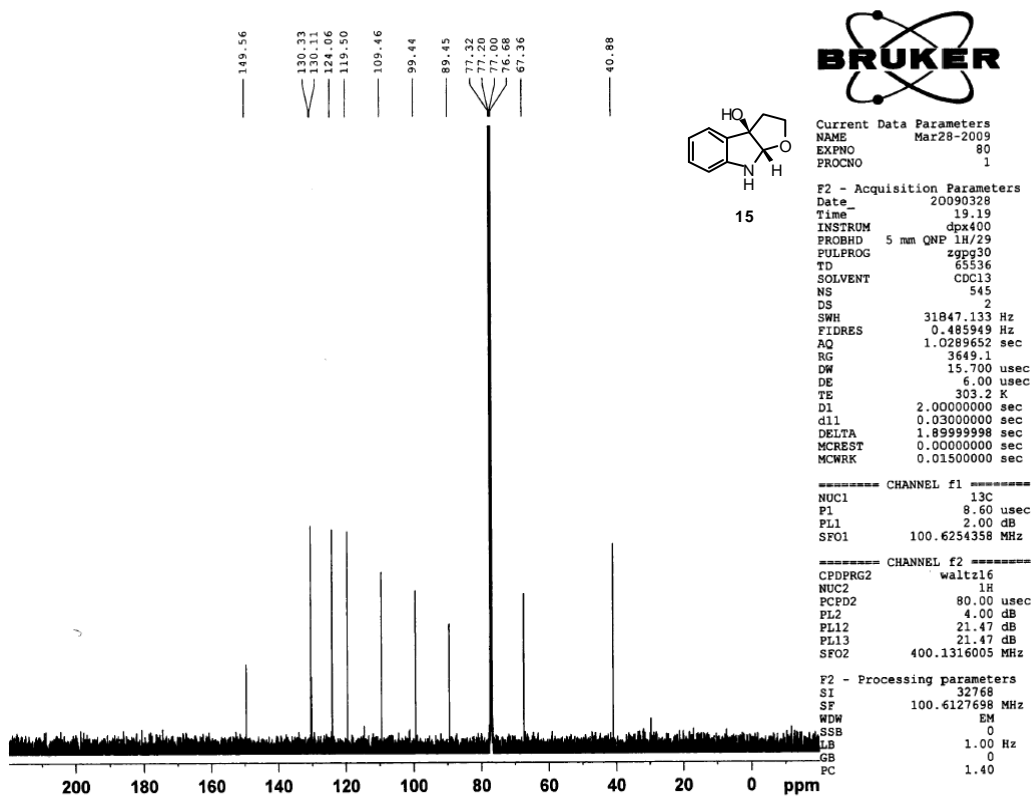

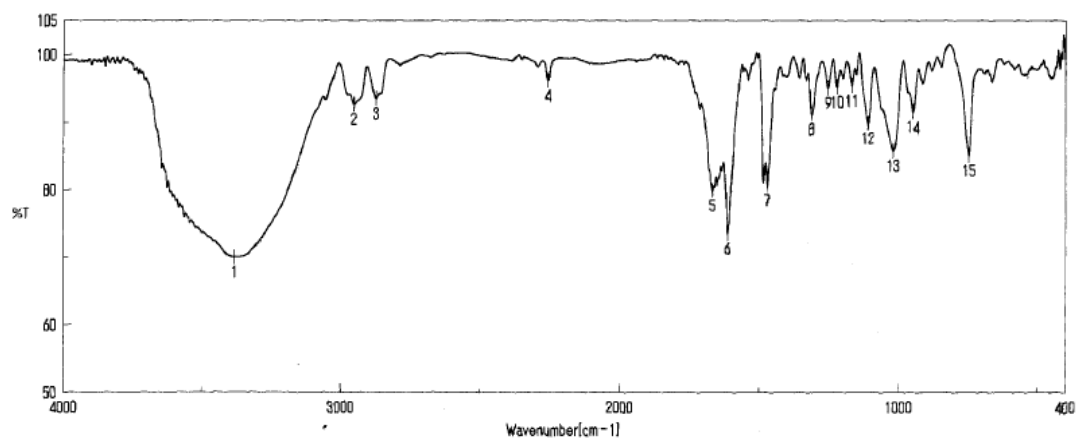

積算回数  
ゼロファイリング  
ゲイン  
日時  
測定者  
ファイル名  
サンプル名  
コメント

32  
ON  
2  
109/04/23 18:43  
Memory#5  
background

分解  
アポダイゼーション  
スキャンスピード

4 cm⁻¹  
Coarse  
2 mm/sec

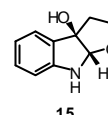

15

|                      |                      |                      |                      |
|----------------------|----------------------|----------------------|----------------------|
| 1: 3382.53, 70.0549  | 2: 2952.48, 92.7123  | 3: 2873.42, 93.5309  | 4: 2255.34, 98.2442  |
| 5: 1898.12, 79.9558  | 6: 1613.16, 73.5297  | 7: 1471.42, 80.7052  | 8: 1313.29, 91.2658  |
| 9: 1255.43, 95.1091  | 10: 1223.61, 95.2541 | 11: 1199.62, 95.4512 | 12: 1111.76, 89.8875 |
| 13: 1021.12, 85.8415 | 14: 949.77, 91.5903  | 15: 747.28, 85.1480  |                      |

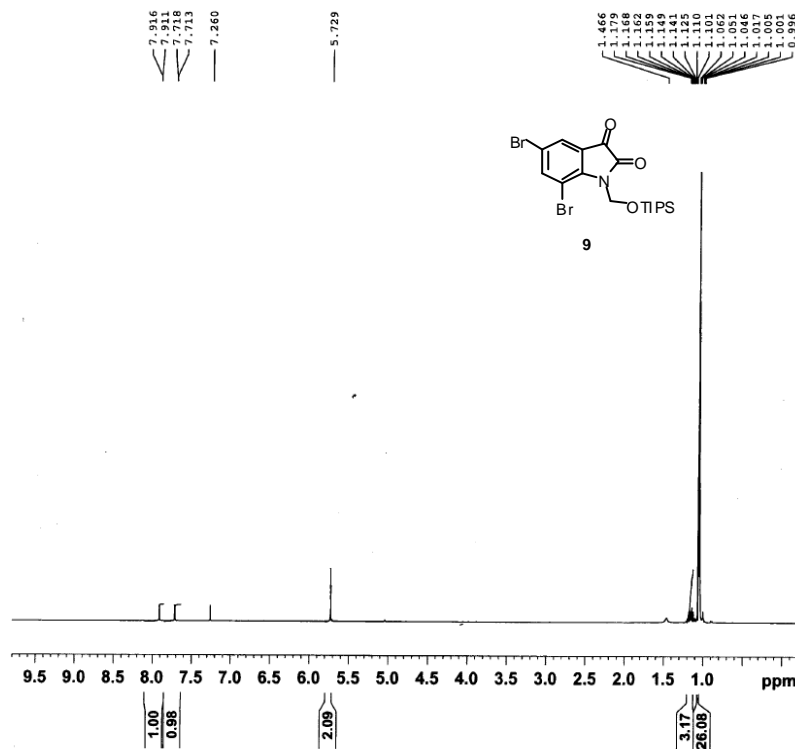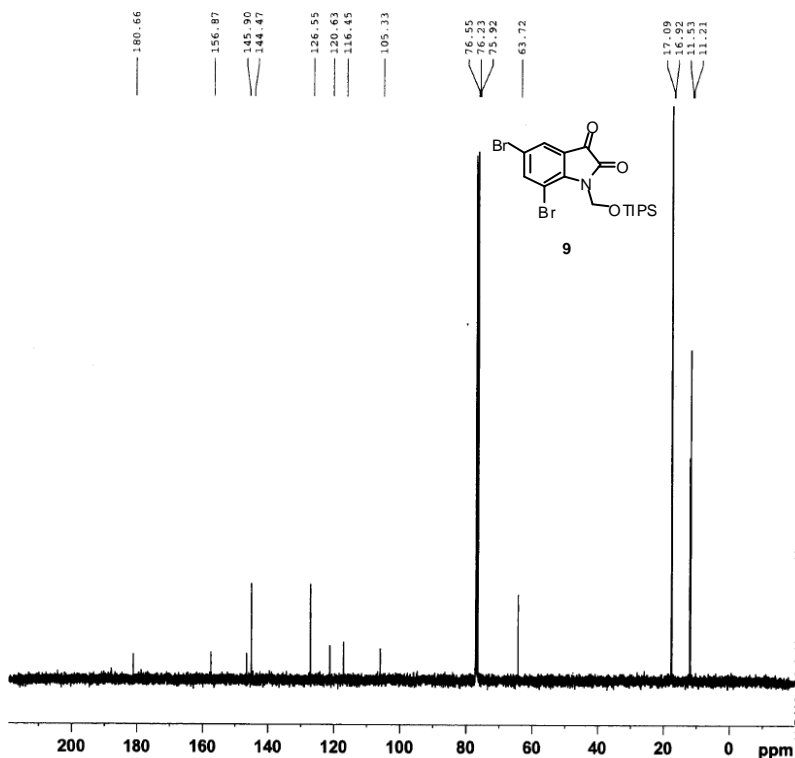



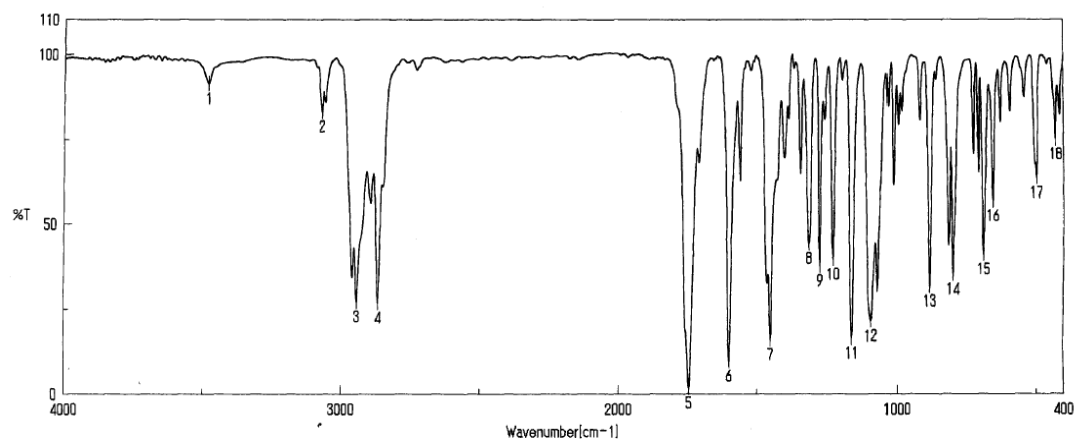

積算回数  
ゼロフィリング  
ゲイン  
日時  
測定者  
ファイル名  
サンプル名  
コメント

64  
ON  
2  
109/01/03 15:06  
diBrisatin (OTIPS) not natural. JWS  
background

分解  
アポダイゼーション  
スキャンスピード

4 cm-1  
Cosine  
2 mm/sec

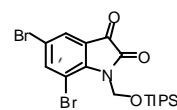

9

|                     |                      |                      |                      |
|---------------------|----------------------|----------------------|----------------------|
| 1: 3476.06, 91.4517 | 2: 3066.26, 83.2333  | 3: 2941.88, 27.3585  | 4: 2864.74, 27.0436  |
| 5: 1746.23, 1.8945  | 6: 1600.63, 9.7920   | 7: 1452.14, 16.2026  | 8: 1313.29, 44.5592  |
| 9: 1274.72, 37.7887 | 10: 1227.47, 39.7451 | 11: 1160.94, 16.6128 | 12: 1092.48, 21.6006 |
| 13: 884.20, 31.9686 | 14: 800.31, 35.3972  | 15: 689.43, 41.2033  | 16: 656.64, 56.9665  |
| 17: 499.47, 63.8390 | 18: 429.08, 75.1549  |                      |                      |

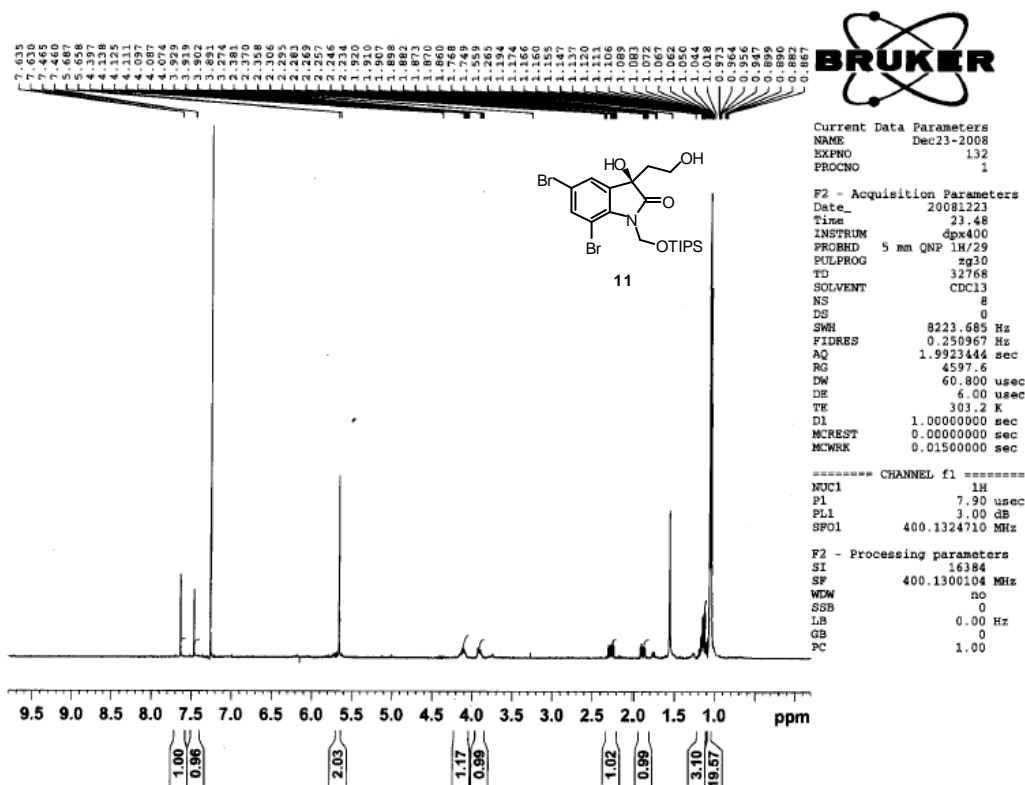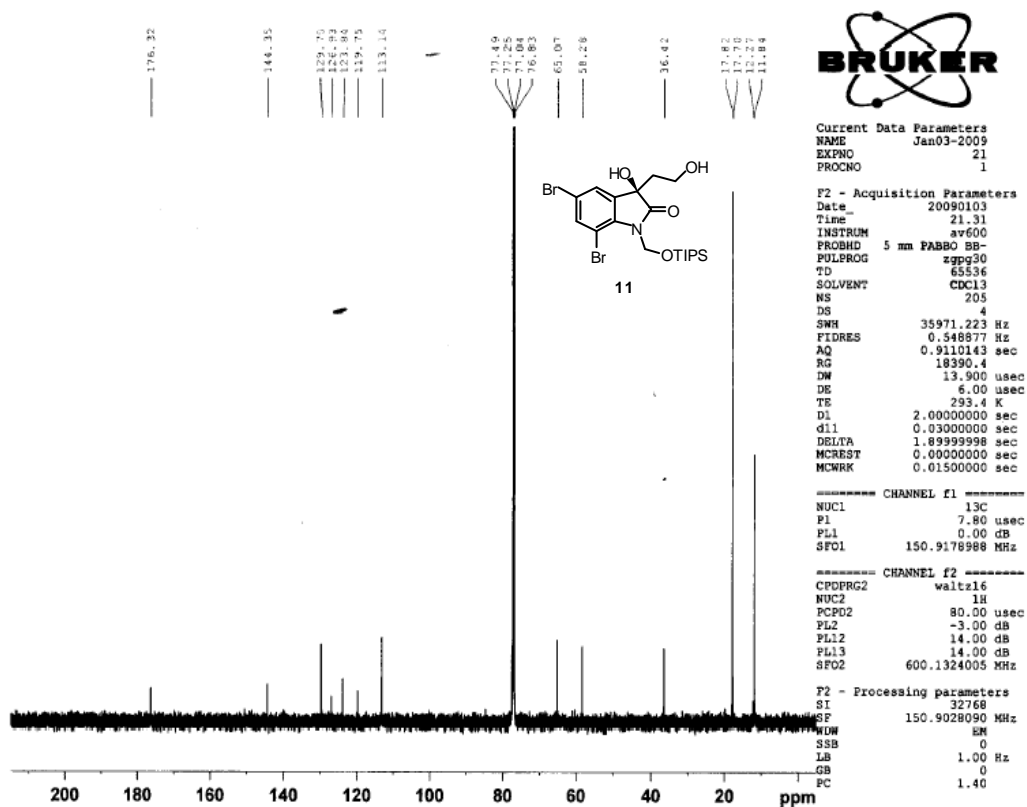

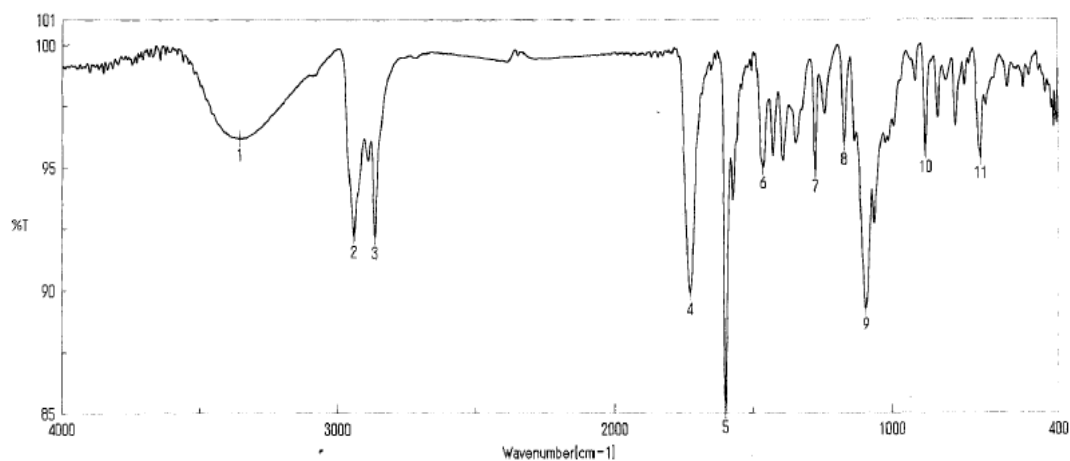

積算回数 64  
 ゼロフィリング ON  
 ゲイン 2  
 日時 108/01/03 23:06  
 測定者  
 ファイル名 Memory#3  
 サンプル名 background  
 コメント

分解  
 アポダイゼーション  
 スキャンスピード

4 cm⁻¹  
 Cosine  
 2 mm/sec

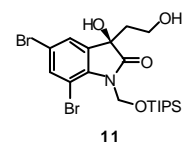

|                     |                     |                     |                     |
|---------------------|---------------------|---------------------|---------------------|
| 1: 3356.50, 96.1773 | 2: 2941.88, 92.2225 | 3: 2864.74, 92.1813 | 4: 1725.98, 89.8775 |
| 5: 1598.70, 85.0725 | 6: 1464.67, 95.0076 | 7: 1278.57, 94.8629 | 8: 1174.44, 95.9840 |
| 9: 1093.44, 89.2615 | 10: 881.31, 95.6806 | 11: 683.64, 95.3996 |                     |

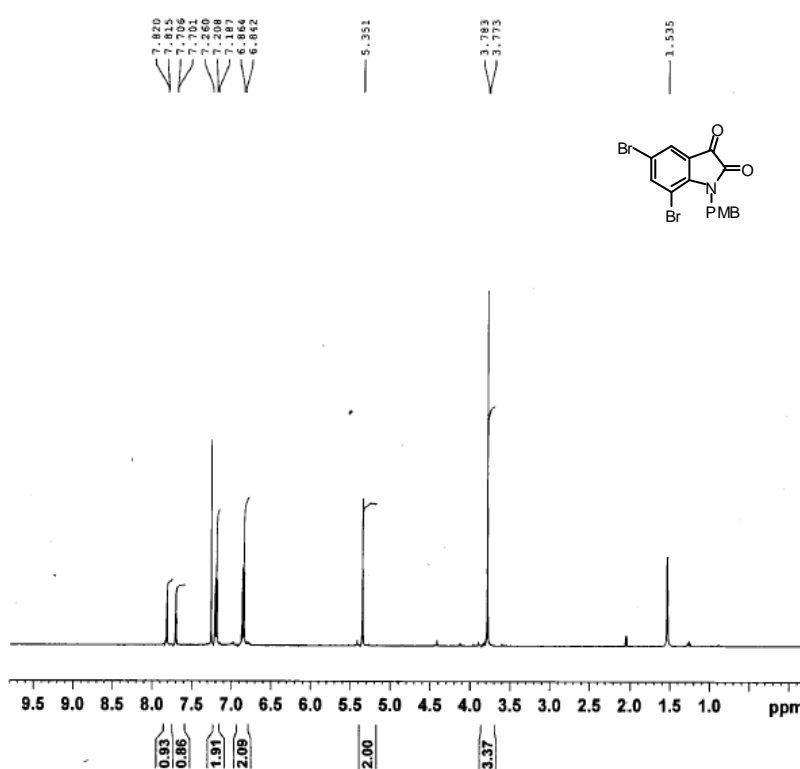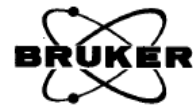

Current Data Parameters  
 NAME Apr23-2009  
 EXPNO 114  
 PROCNO 1

F2 - Acquisition Parameters  
 Date\_ 20090423  
 Time 19.02  
 INSTRUM dpx400  
 PROBHD 5 mm QNP 1H/29  
 PULPROG zg30  
 TD 32768  
 SOLVENT CDCl3  
 NS 8  
 DS 0  
 SWH 8223.685 Hz  
 FIDRES 0.250967 Hz  
 AQ 1.9923444 sec  
 RG 10321.3  
 DW 60.800 usec  
 DE 5.00 usec  
 TE 303.2 K  
 D1 1.00000000 sec  
 MCREST 0.00000000 sec  
 MCWRC 0.01500000 sec

===== CHANNEL f1 =====  
 NUC1 1H  
 P1 10.70 usec  
 PL1 4.00 dB  
 SFO1 400.1324710 MHz

F2 - Processing parameters  
 SI 16384  
 SF 400.1300092 MHz  
 WDW EM  
 SSB 0  
 LB 0.30 Hz  
 GB 0  
 PC 1.00

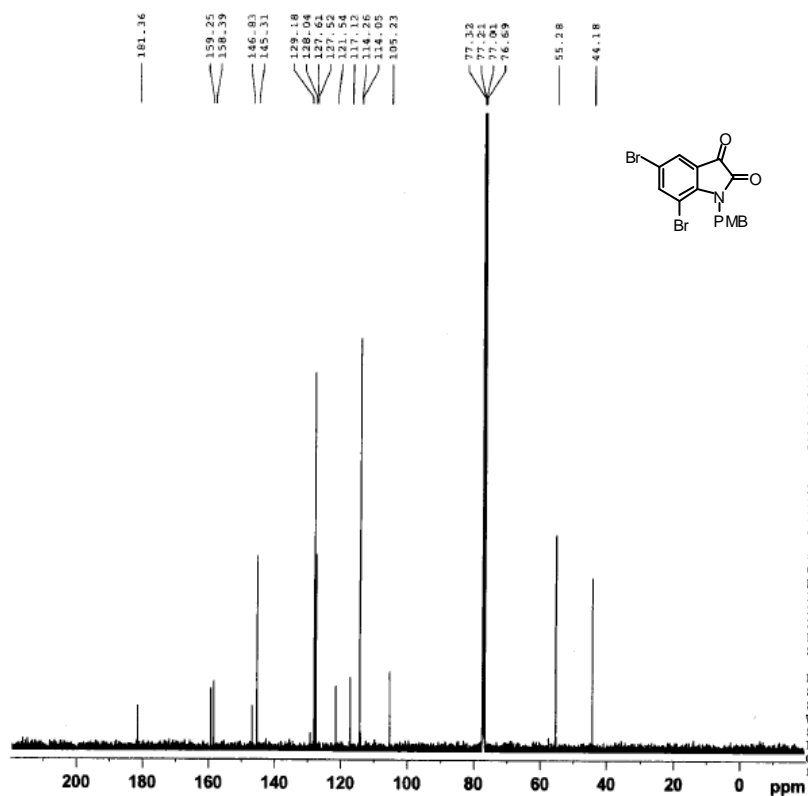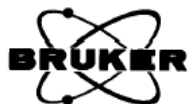

Current Data Parameters  
 NAME Apr23-2009-hayaishi  
 EXPNO 150  
 PROCNO 1

F2 - Acquisition Parameters  
 Date\_ 20090423  
 Time 19.20  
 INSTRUM spect  
 PROBHD 5 mm PABBO BB-  
 PULPROG zgpg30  
 TD 65536  
 SOLVENT CDCl3  
 NS 1024  
 DS 4  
 SWH 24038.461 Hz  
 FIDRES 0.366798 Hz  
 AQ 1.3631988 sec  
 RG 228  
 DW 20.800 usec  
 DE 6.00 usec  
 TE 302.9 K  
 D1 2.00000000 sec  
 d11 0.03000000 sec  
 DELTA 1.89999999 sec  
 TD0 1

===== CHANNEL f1 =====  
 NUC1 13C  
 P1 7.20 usec  
 PL1 -3.50 dB  
 SFO1 100.6354036 MHz

===== CHANNEL f2 =====  
 CPDPRG2 waltz16  
 NUC2 1H  
 PCPD2 80.00 usec  
 PL2 -4.00 dB  
 PL12 14.50 dB  
 PL13 14.50 dB  
 SFO2 400.1816007 MHz

F2 - Processing parameters  
 SI 32768  
 SF 100.6253411 MHz  
 WDW HM  
 SSB 0  
 LB 1.00 Hz  
 GB 0  
 PC 1.40

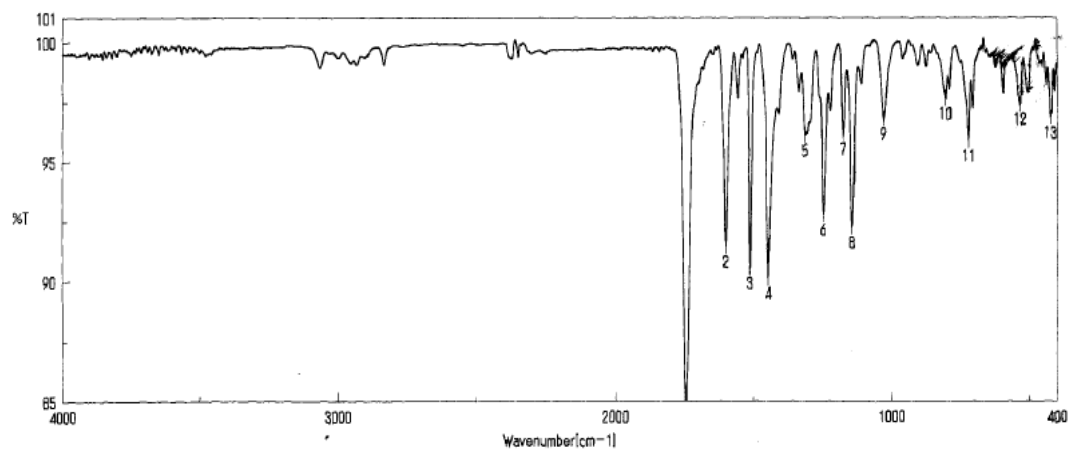

積算回数  
ゼロファイリング  
ゲイン  
日時  
測定者  
ファイル名  
サンプル名  
コメント

32  
ON  
2  
109/04/23 18:38  
Memory#3  
background

分解  
アポダイゼーション  
スキャンスピード

4 cm-1  
Cosine  
2 mm/sec

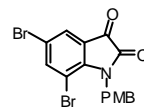

|                     |                     |                     |                     |
|---------------------|---------------------|---------------------|---------------------|
| 1: 1744.30, 85.0089 | 2: 1600.83, 91.4791 | 3: 1513.85, 90.5878 | 4: 1447.31, 90.1978 |
| 5: 1318.21, 96.1531 | 6: 1247.72, 92.8201 | 7: 1178.29, 98.2131 | 8: 1144.55, 92.2825 |
| 9: 1031.73, 96.8260 | 10: 808.03, 87.8855 | 11: 724.14, 95.9124 | 12: 537.06, 87.4485 |
| 13: 425.23, 96.8853 |                     |                     |                     |

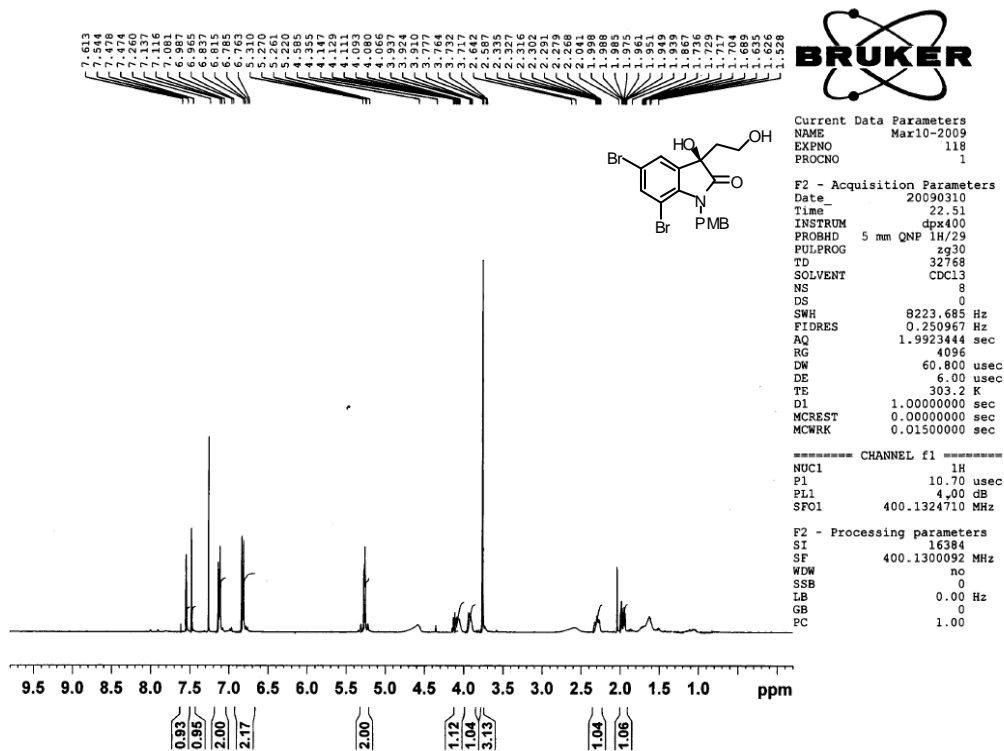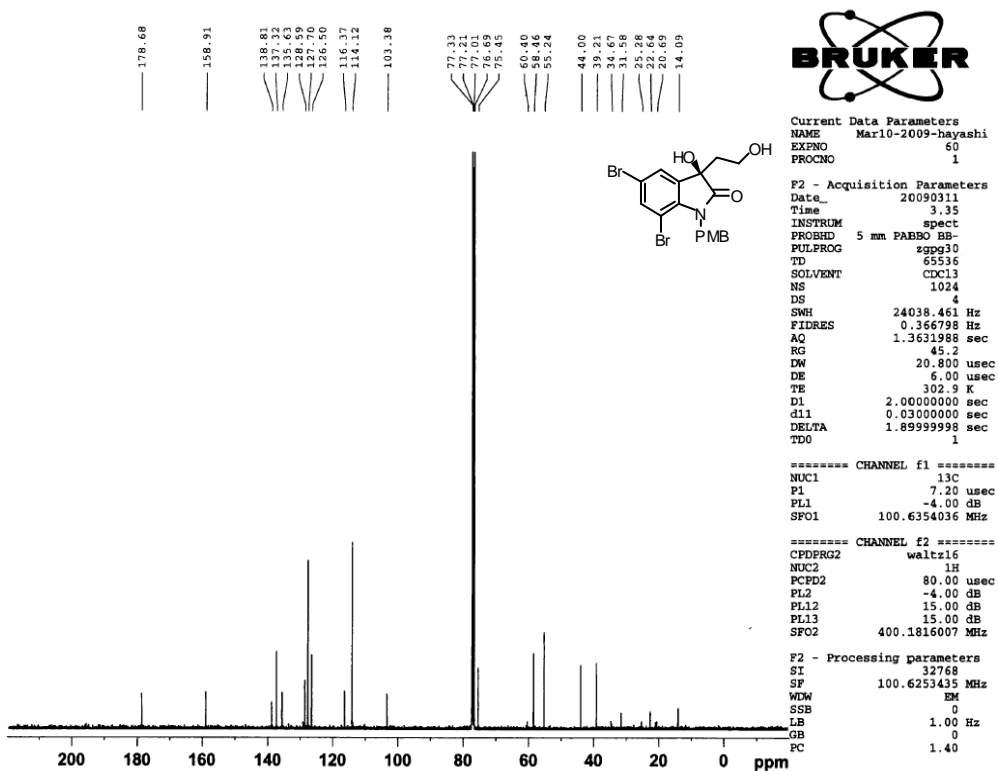

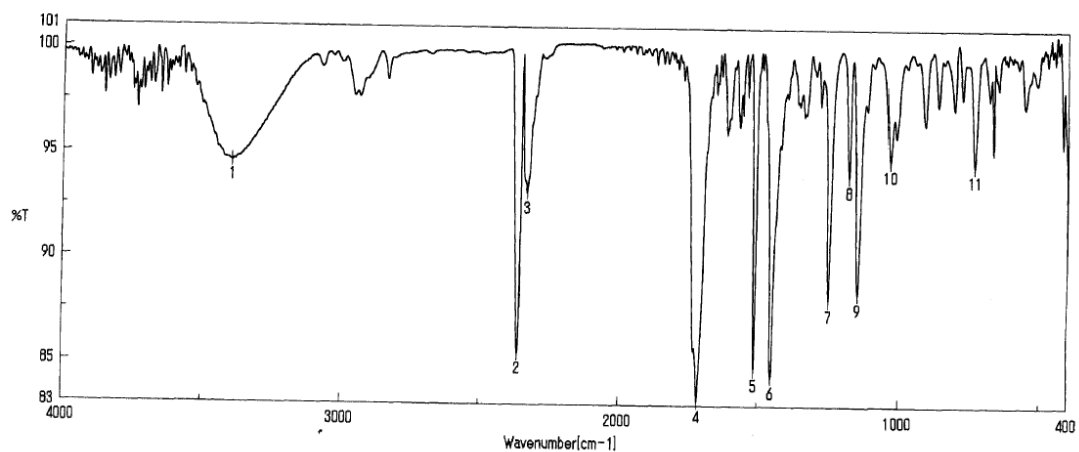

積算回数  
ゼロファイリング  
ゲイン  
日時  
測定者  
ファイル名  
サンプル名  
コメント

16  
ON  
2  
108/03/11 20:03  
Memory#3  
background

分解  
アポダイゼーション  
スキャンスピード

4 cm-1  
Cosine  
2 mm/sec

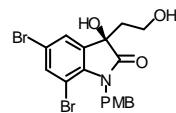

|                     |                      |                     |                     |
|---------------------|----------------------|---------------------|---------------------|
| 1: 3393.14, 94.5952 | 2: 2362.37, 85.4855  | 3: 2330.55, 93.1385 | 4: 1716.34, 83.2270 |
| 5: 1513.85, 84.7558 | 6: 1452.14, 84.3839  | 7: 1247.72, 88.0858 | 8: 1177.33, 93.9838 |
| 9: 1144.55, 88.3948 | 10: 1033.66, 94.7545 | 11: 735.71, 94.5325 |                     |

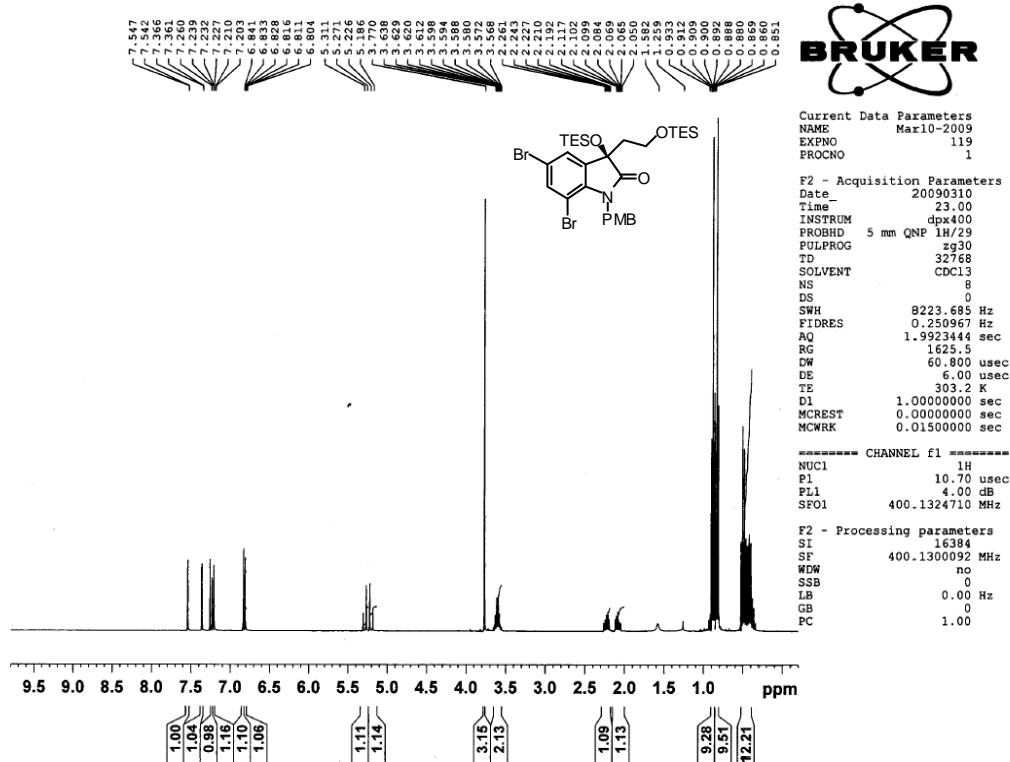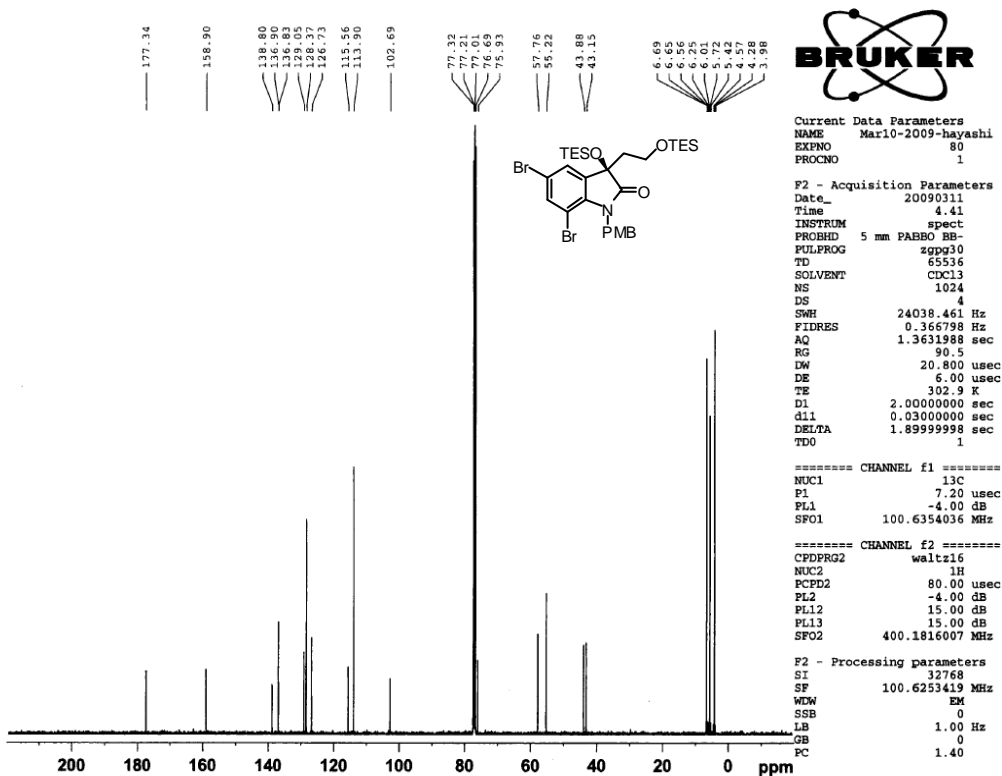



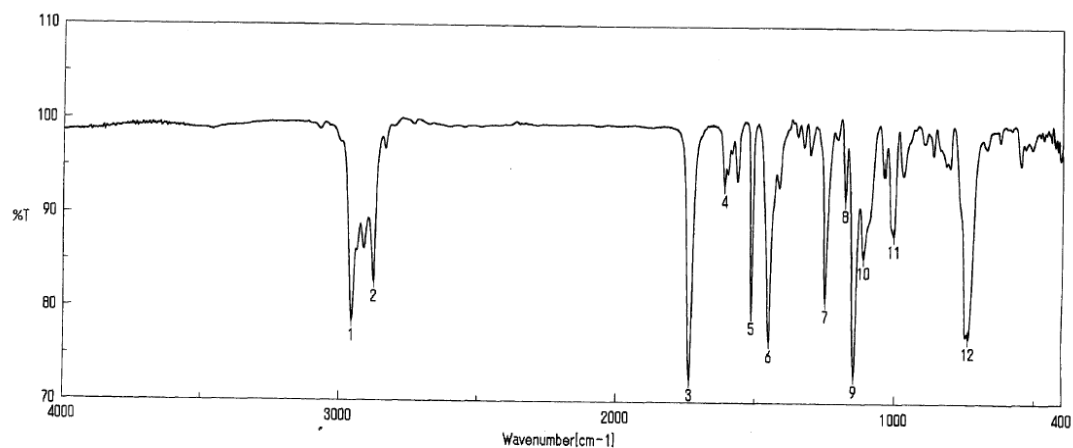

積算回数  
ゼロファイリング  
ゲイン  
日時  
測定者  
ファイル名  
サンプル名  
コメント

16  
ON  
2  
109/03/11 20:19  
Memory#4  
background

分解  
アポダイゼーション  
スキャンスピード

4 cm-1  
Cosine  
2 mm/sec

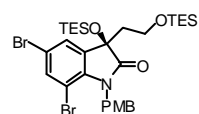

|                     |                      |                      |                     |
|---------------------|----------------------|----------------------|---------------------|
| 1: 2954.41, 78.5849 | 2: 2875.34, 82.7350  | 3: 1735.62, 72.4820  | 4: 1613.16, 93.1573 |
| 5: 1513.85, 79.8046 | 6: 1450.21, 78.8440  | 7: 1247.72, 80.9638  | 8: 1177.33, 91.6334 |
| 9: 1144.55, 72.9488 | 10: 1110.80, 85.6001 | 11: 1005.70, 87.8985 | 12: 736.67, 77.0784 |

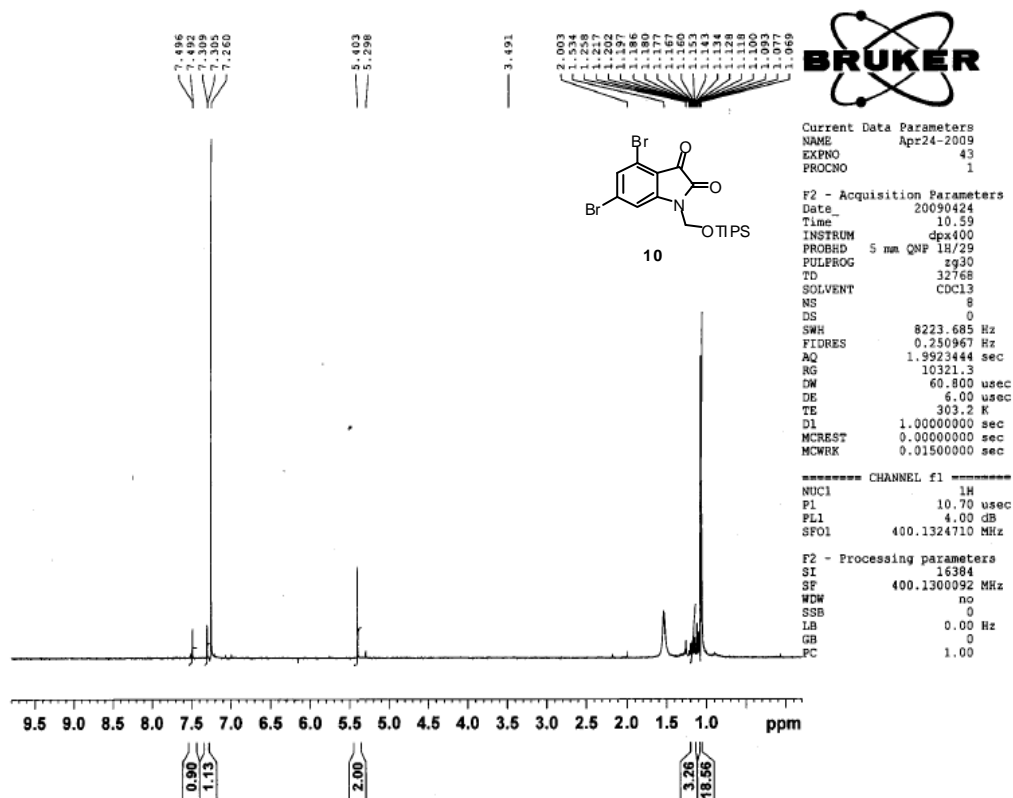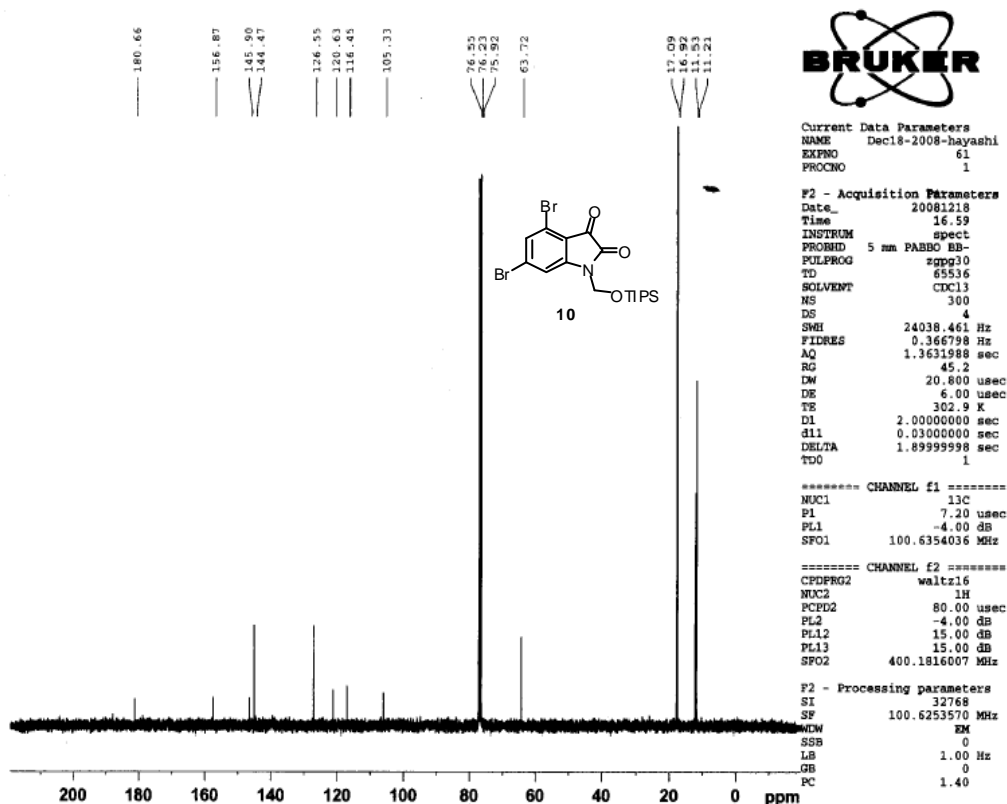

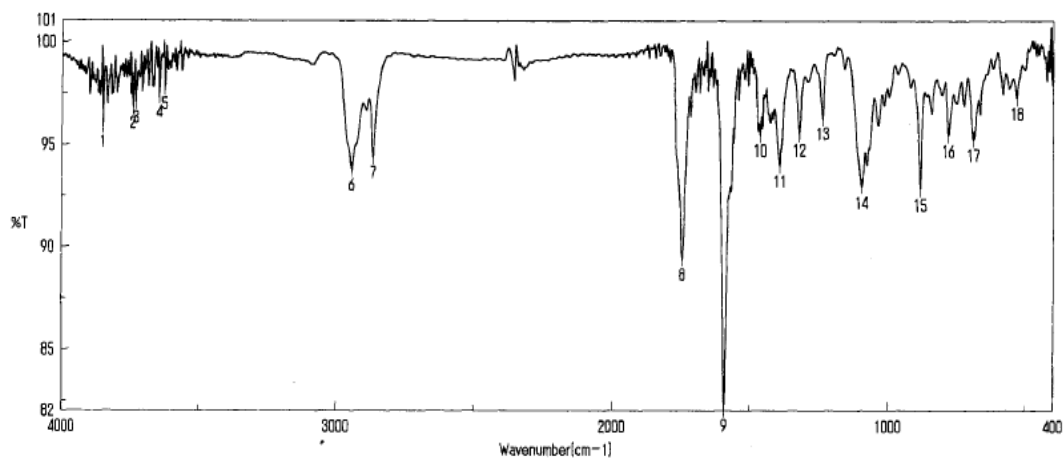

積算回数  
ゼロフィリング  
ゲイン  
日時  
測定者  
ファイル名  
サンプル名  
コメント

64  
ON  
2  
109/01/03 14:49  
diBrisatin(OTIPS) natural. JMS  
background

分解  
アポダイゼーション  
スキャンスピード

4 cm-1  
Cosine  
2 mm/sec

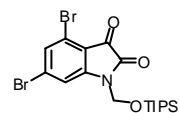

10

|                      |                      |                      |                      |
|----------------------|----------------------|----------------------|----------------------|
| 1: 3650.18, 95.8923  | 2: 3741.23, 96.8167  | 3: 3730.62, 97.0873  | 4: 3645.77, 97.3724  |
| 5: 3625.52, 97.7852  | 6: 2942.94, 93.8090  | 7: 2885.70, 94.3987  | 8: 1745.26, 89.4255  |
| 9: 1591.95, 82.0631  | 10: 1482.74, 95.4954 | 11: 1393.32, 93.9870 | 12: 1321.96, 95.5032 |
| 13: 1236.04, 98.3097 | 14: 1096.33, 92.9626 | 15: 883.24, 92.6413  | 16: 780.06, 95.4653  |
| 17: 689.43, 95.2644  | 18: 532.26, 97.2834  |                      |                      |

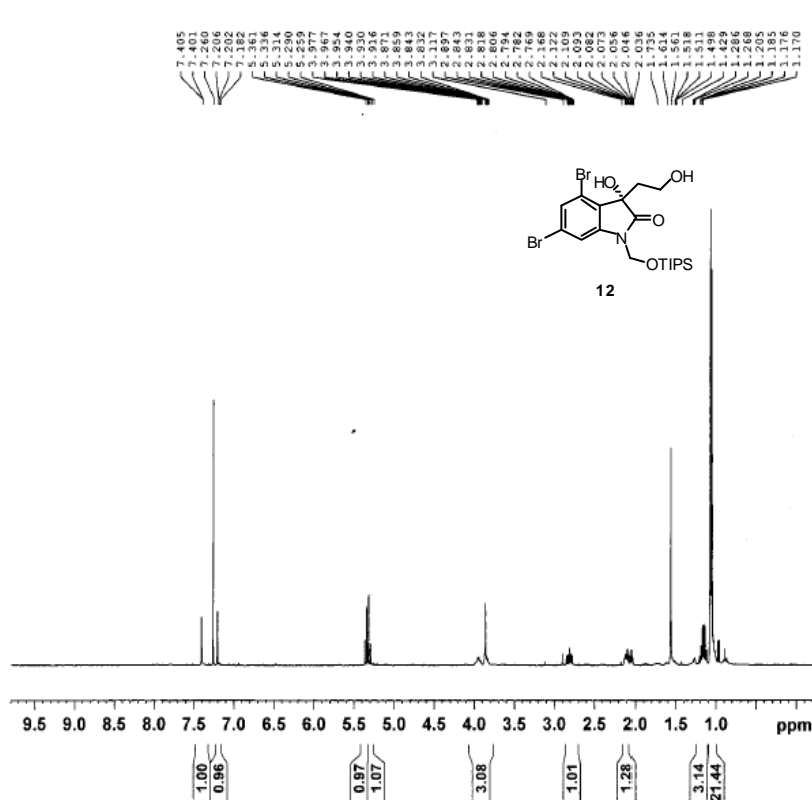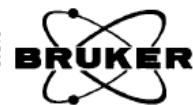

Current Data Parameters  
NAME Jan03-2009  
EXPNO 37  
PROCNO 1

F2 - Acquisition Parameters  
Date\_ 20090103  
Time 20.22  
INSTRUM dpx400  
PROBHD 5 mm QNP 1H/29  
PULPROG zg30  
TD 32768  
SOLVENT CDCl3  
NS 8  
DS 0  
SWH 8223.685 Hz  
FIDRES 0.250967 Hz  
AQ 1.9923444 sec  
RG 4597.6  
CW 60.800 usec  
DE 6.00 usec  
TE 303.2 K  
D1 1.00000000 sec  
MCREST 0.00000000 sec  
MCWRK 0.01500000 sec

===== CHANNEL f1 =====  
NUC1 1H  
P1 10.70 usec  
PL1 4.00 dB  
SFO1 400.1324710 MHz

F2 - Processing parameters  
SI 16384  
SF 400.1300092 MHz  
WDW no  
SSB 0  
LB 0.00 Hz  
GB 0  
PC 1.00

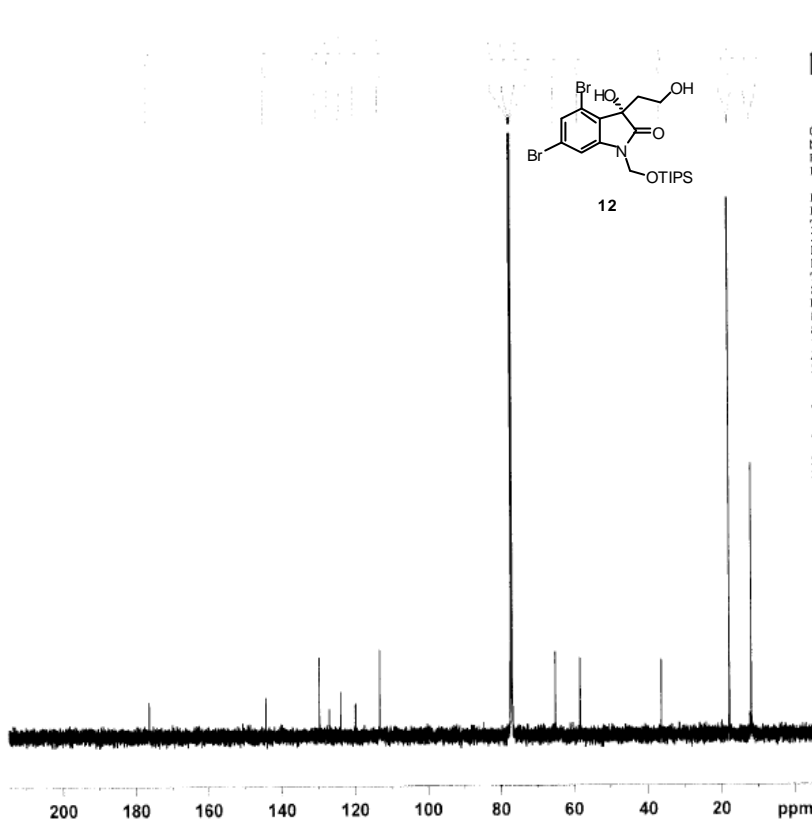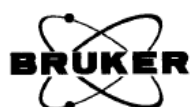

Current Data Parameters  
NAME Jan03-2009  
EXPNO 21  
PROCNO 1

F2 - Acquisition Parameters  
Date\_ 20090103  
Time 21.31  
INSTRUM av600  
PROBHD 5 mm PABBO BB-  
PULPROG zgpg30  
TD 65536  
SOLVENT CDCl3  
NS 205  
DS 4  
SWH 35971.223 Hz  
FIDRES 0.548877 Hz  
AQ 0.9110143 sec  
RG 18390.4  
CW 13.900 usec  
DE 6.00 usec  
TE 293.4 K  
D1 2.00000000 sec  
d11 0.03000000 sec  
DELTA 1.89999998 sec  
MCREST 0.00000000 sec  
MCWRK 0.01500000 sec

===== CHANNEL f1 =====  
NUC1 13C  
P1 7.80 usec  
PL1 0.00 dB  
SFO1 150.9178989 MHz

===== CHANNEL f2 =====  
CPDPRG2 waltz16  
NUC2 1H  
PCPD2 80.00 usec  
PL2 -3.00 dB  
PL12 14.00 dB  
PL13 14.00 dB  
SFO2 600.1324005 MHz

F2 - Processing parameters  
SI 32768  
SF 150.9028090 MHz  
WDW EM  
SSB 0  
LB 1.00 Hz  
GB 0  
PC 1.40

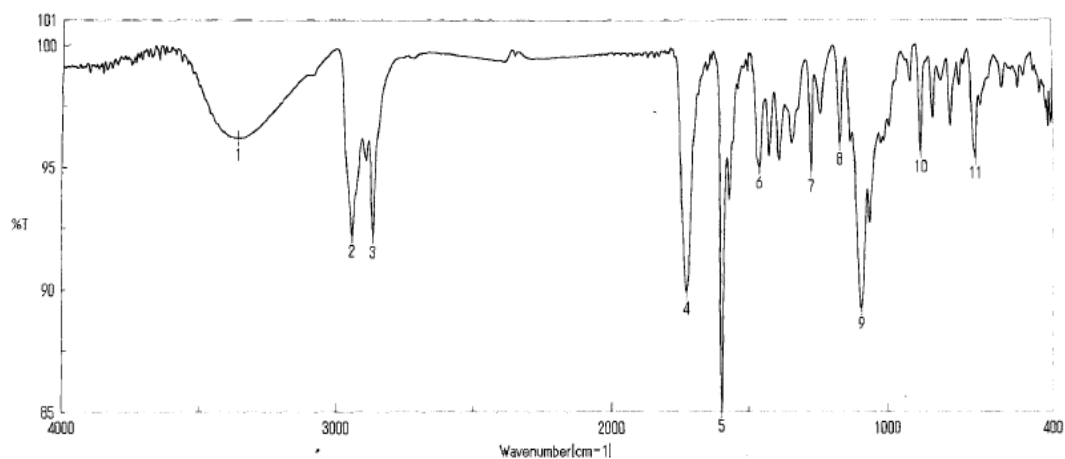

積算回数  
ゼロフィリング  
ゲイン  
日時  
測定者  
ファイル名  
サンプル名  
コメント

64  
ON  
2  
108/01/03 23:06  
Memory#3  
background

分解  
アポダイゼーション  
スキャンスピード

4 cm⁻¹  
Cosine  
2 mm/sec

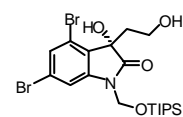

12

|                     |                     |                     |                     |
|---------------------|---------------------|---------------------|---------------------|
| 1: 3356.50, 96.1773 | 2: 2941.88, 92.2225 | 3: 2864.74, 92.1813 | 4: 1725.98, 89.8775 |
| 5: 1598.70, 85.0725 | 6: 1484.57, 95.0076 | 7: 1278.57, 94.8629 | 8: 1174.44, 95.9840 |
| 9: 1093.44, 89.2615 | 10: 881.31, 95.6806 | 11: 683.64, 95.3998 |                     |

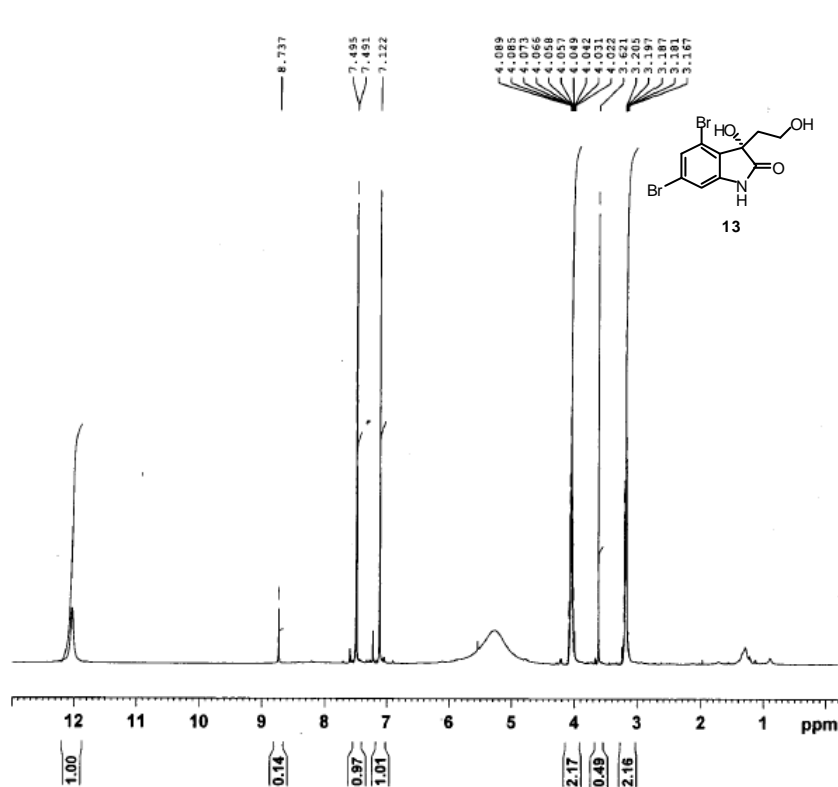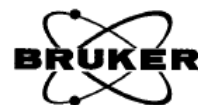

Current Data Parameters  
NAME Mar31-2009  
EXPNO 30  
PROCNO 1

F2 - Acquisition Parameters  
Date\_ 20090331  
Time 15.58  
INSTRUM dpx400  
PROBHD 5 mm QNP 1H/29  
PULPROG zg30  
TD 32768  
SOLVENT Pyr  
NS 32  
DS 0  
SWH 8223.685 Hz  
FIDRES 0.250967 Hz  
AQ 1.9923444 sec  
RG 2580.3  
DW 60.800 usec  
DE 6.00 usec  
TE 303.2 K  
D1 1.00000000 sec  
MCREST 0.00000000 sec  
MCWRK 0.01500000 sec

===== CHANNEL f1 =====  
NUC1 1H  
P1 10.70 usec  
PL1 4.00 dB  
SFO1 400.1324710 MHz

F2 - Processing parameters  
SI 16384  
SF 400.1305874 MHz  
WDW EM  
SSB 0  
LB 0.30 Hz  
GB 0  
PC 1.00

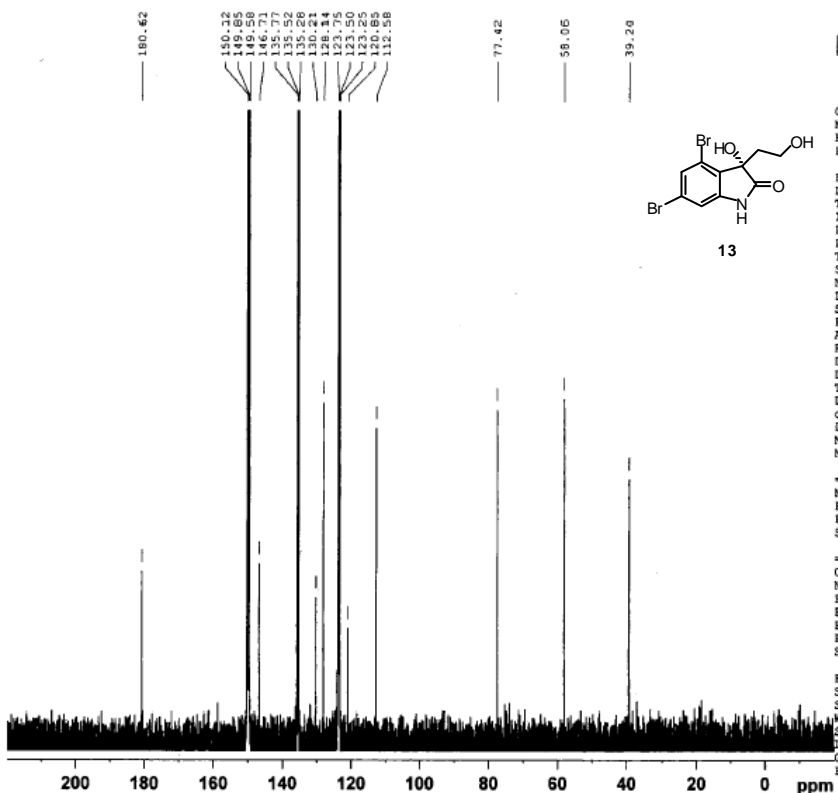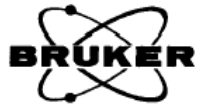

Current Data Parameters  
NAME Mar31-2009  
EXPNO 31  
PROCNO 1

F2 - Acquisition Parameters  
Date\_ 20090331  
Time 16.11  
INSTRUM dpx400  
PROBHD 5 mm QNP 1H/29  
PULPROG zgpg30  
TD 65536  
SOLVENT Pyr  
NS 180  
DS 2  
SWH 31847.133 Hz  
FIDRES 0.405949 Hz  
AQ 1.0289652 sec  
RG 7298.2  
DW 15.700 usec  
DE 6.00 usec  
TE 303.2 K  
D1 2.00000000 sec  
d11 0.03000000 sec  
DELTA 1.89999998 sec  
MCREST 0.00000000 sec  
MCWRK 0.01500000 sec

===== CHANNEL f1 =====  
NUC1 13C  
P1 8.60 usec  
PL1 2.00 dB  
SFO1 100.6254358 MHz

===== CHANNEL f2 =====  
CPDPRG2 waltz16  
NUC2 1H  
PCPD2 80.00 usec  
PL2 4.00 dB  
PL12 21.47 dB  
PL13 21.47 dB  
SFO2 400.1316005 MHz

F2 - Processing parameters  
SI 32768  
SF 100.6128973 MHz  
WDW EM  
SSB 0  
LB 1.00 Hz  
GB 0  
PC 1.40

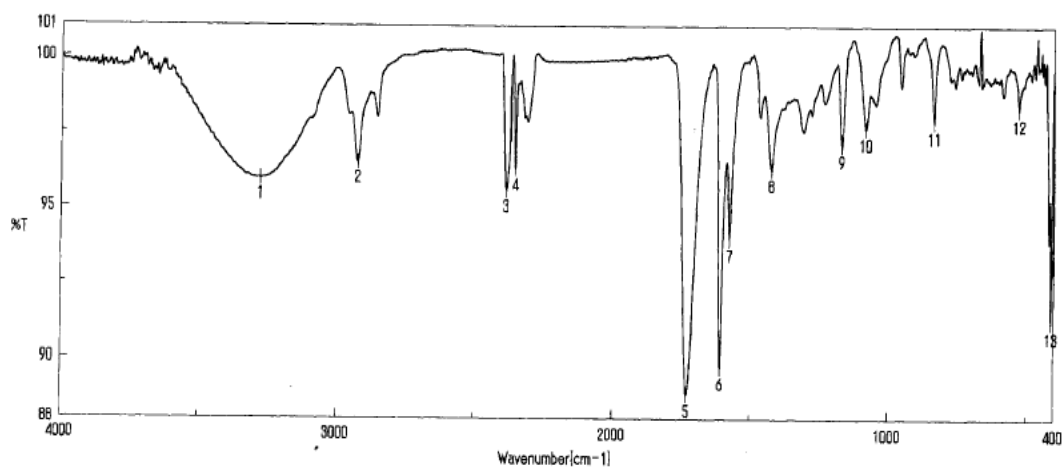

積算回数  
ゼロフィリング  
ゲイン  
日時  
測定者  
ファイル名  
サンプル名  
コメント

16  
ON  
1  
109/03/31 15:35

Memory#4  
background

分解  
アポダイゼーション  
スキャンスピード

4 cm-1  
Cosine  
2 mm/sec

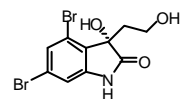

13

|                     |                      |                     |                     |
|---------------------|----------------------|---------------------|---------------------|
| 1: 3275.50, 95.9556 | 2: 2923.56, 96.5016  | 3: 2380.89, 95.5881 | 4: 2348.87, 96.2823 |
| 5: 1726.83, 88.8083 | 6: 1607.38, 89.6934  | 7: 1574.59, 93.9574 | 8: 1424.17, 96.2745 |
| 9: 1189.65, 97.0914 | 10: 1082.83, 97.6470 | 11: 836.95, 97.8771 | 12: 527.44, 98.2881 |
| 13: 498.83, 91.2279 |                      |                     |                     |

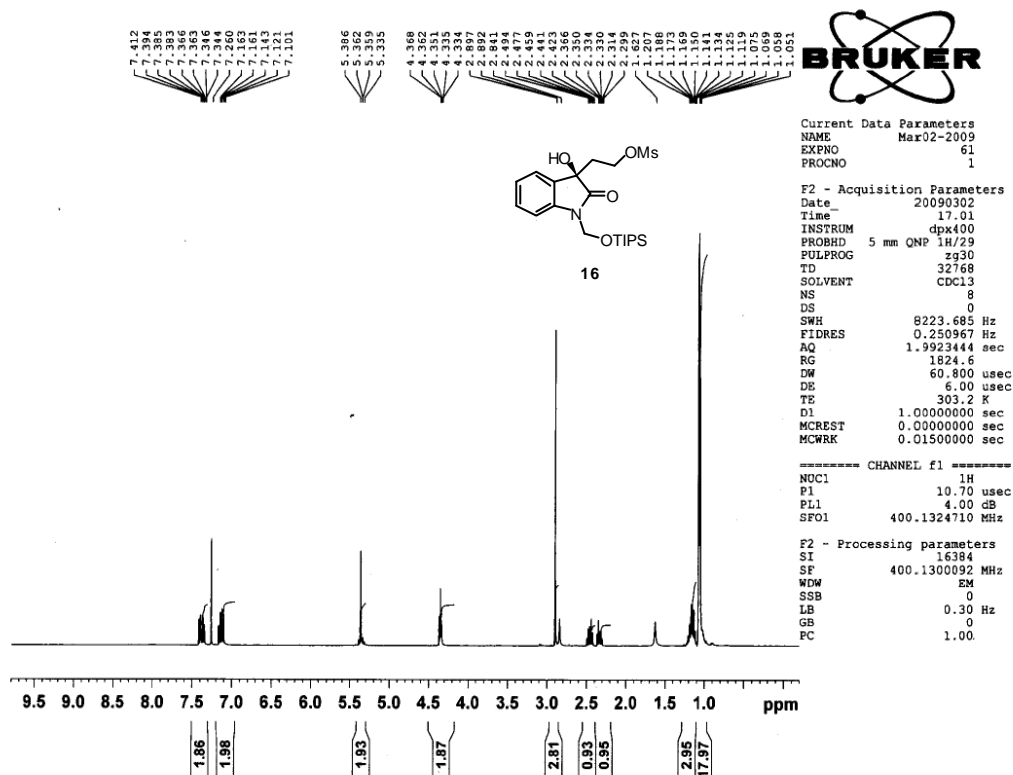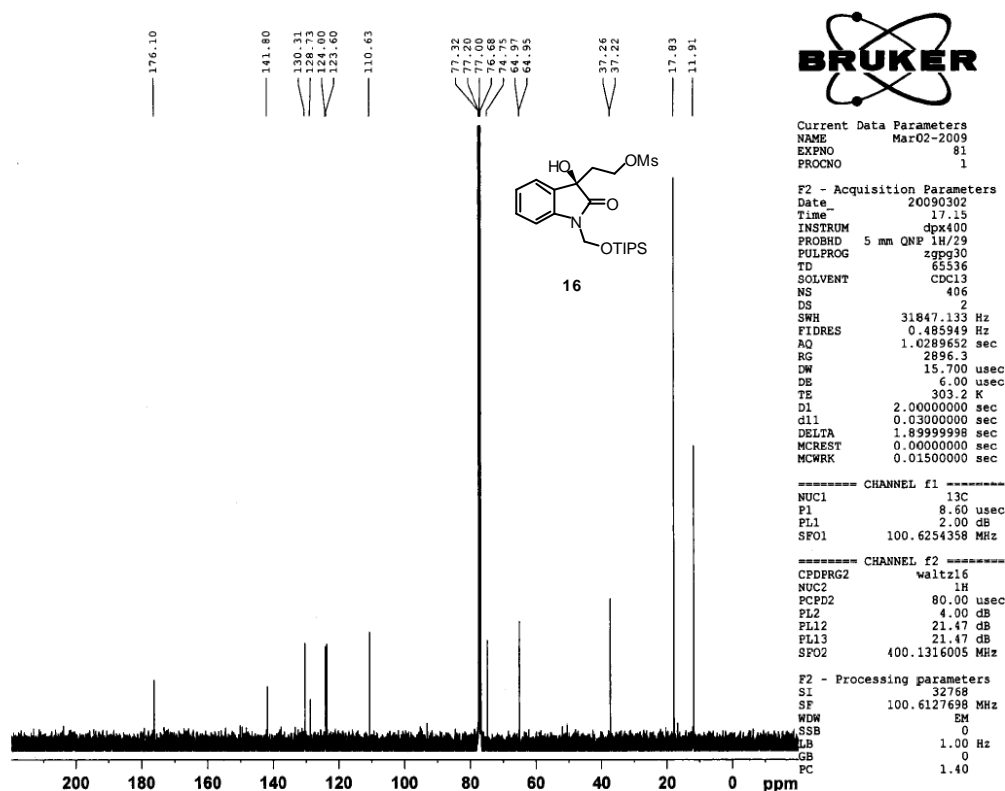



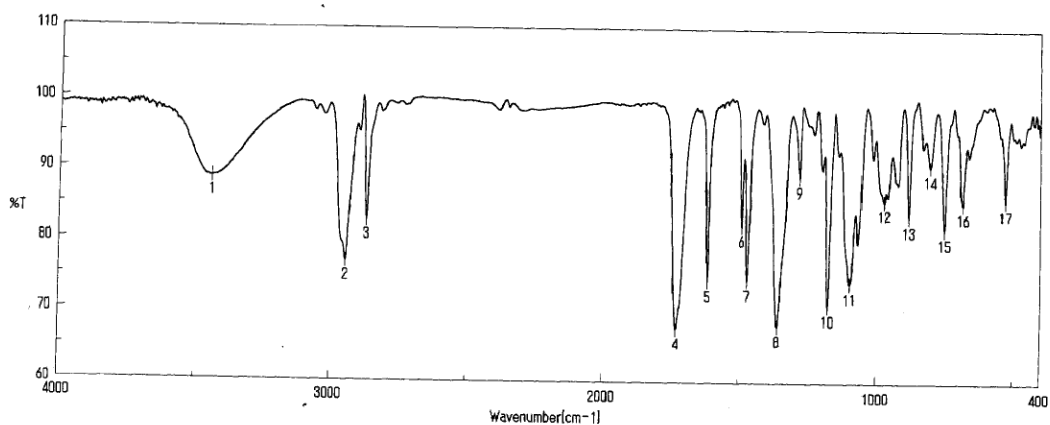

繰り返し回数 16  
 ゼロファイリング ON  
 ゲイン 1  
 日時 109/03/09 20:36  
 測定者  
 ファイル名 Memory#3  
 サンプル名 background  
 コメント

分解 4 cm⁻¹  
 アポダイゼーション Cosine  
 スキャンスピード 2 mm/sec

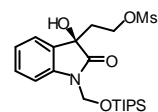

16

|                     |                      |                      |                     |
|---------------------|----------------------|----------------------|---------------------|
| 1: 3437.49, 88.7907 | 2: 2944.77, 76.9865  | 3: 2886.67, 82.8222  | 4: 1730.80, 67.6003 |
| 5: 1615.09, 74.3235 | 6: 1489.74, 82.1824  | 7: 1489.49, 74.4732  | 8: 1359.57, 68.0199 |
| 9: 1280.50, 89.1570 | 10: 1175.40, 70.8730 | 11: 1094.41, 74.1168 | 12: 973.88, 85.8708 |
| 13: 883.24, 83.5410 | 14: 806.10, 90.7340  | 15: 752.10, 81.8180  | 16: 684.61, 65.3872 |
| 17: 528.40, 85.6095 |                      |                      |                     |

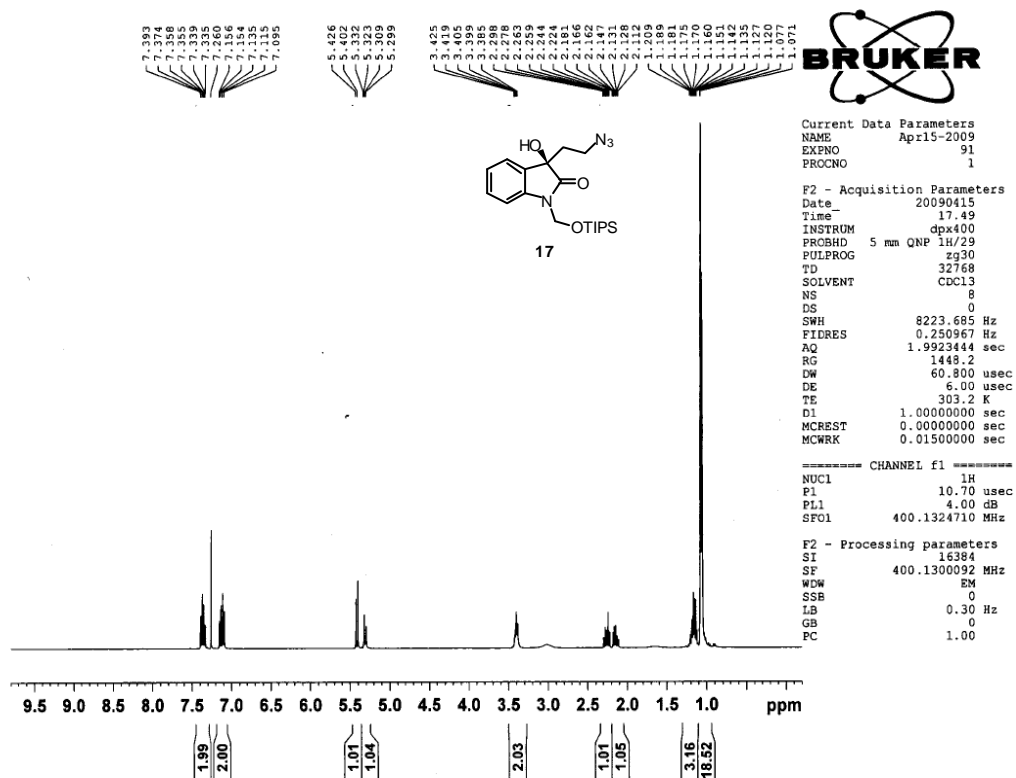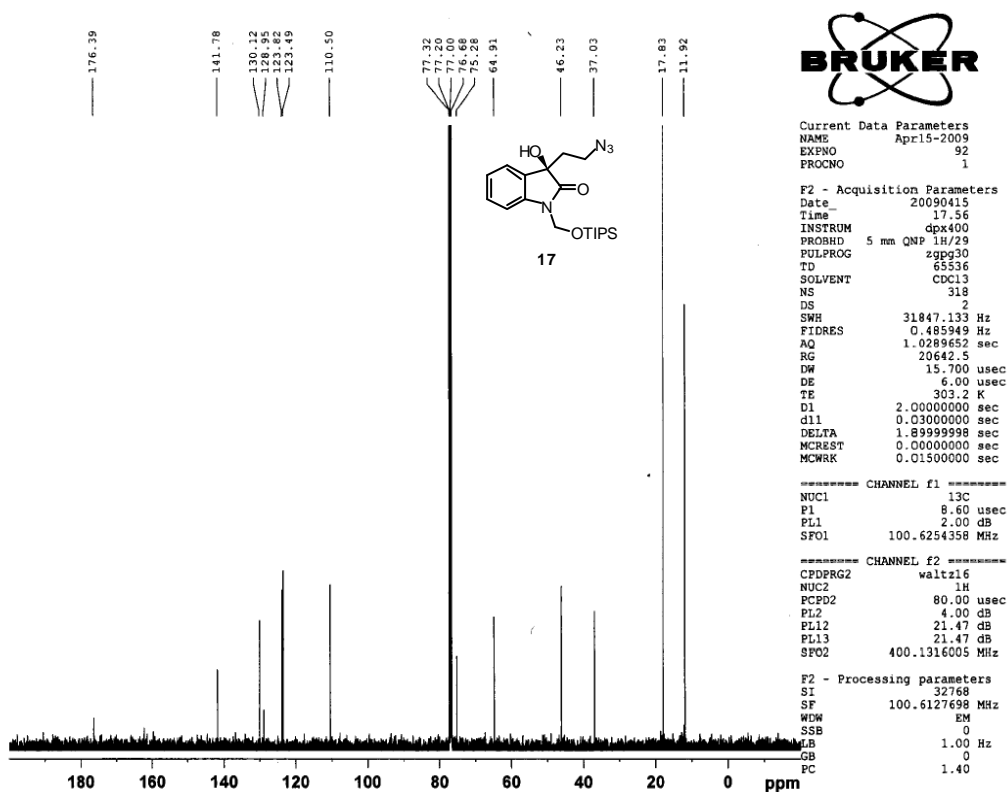

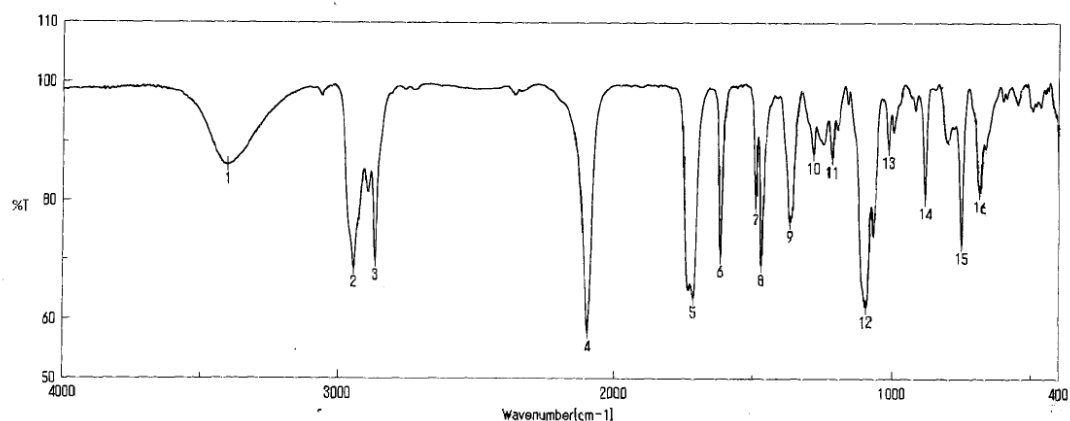

積算回数  
ゼロフィリング  
ゲイン  
日時  
測定者  
ファイル名  
サンプル名  
コメント

16  
ON  
1  
109/04/15 20:44  
Memory#3  
background

分解  
アポダイゼーション  
スキャンスピード

4 cm-1  
Cosine  
2 mm/sec

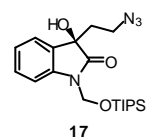

|                      |                      |                      |                      |
|----------------------|----------------------|----------------------|----------------------|
| 1: 3402.78, 86.0810  | 2: 2943.80, 68.7794  | 3: 2886.67, 69.9037  | 4: 2097.21, 57.9311  |
| 5: 1715.37, 63.7242  | 6: 1616.06, 70.5728  | 7: 1488.78, 79.2320  | 8: 1469.40, 69.1118  |
| 9: 1366.32, 76.5065  | 10: 1281.47, 87.9909 | 11: 1213.97, 87.2798 | 12: 1092.48, 62.0546 |
| 13: 1015.34, 88.9378 | 14: 882.27, 80.4073  | 15: 751.14, 72.8242  | 16: 685.57, 81.5139  |

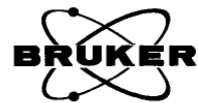

```

Current Data Parameters
NAME          May17-2009
EXPNO         1
PROCNO        1

F2 - Acquisition Parameters
Date          20090317
Time          13.00
INSTRUM       5 mm QNP
PROBHD        dpx400
PULPROG       zg30
TD            32768
SOLVENT       CDCl3
NS            8
DS            0
SWH           8223.685 Hz
FIDRES        0.25067 Hz
AQ            1.9923444 sec
RG            919.52
RO            60.800 usec
DE            6.000 usec
TE            303.2 K
D1            1.00000000 sec
d11           0.00000000 sec
MCRET        0.01500000 sec
MCWRK        0.01500000 sec

```

```
===== CHANNEL f1 =====
NUC1          1H
P1            7.90 usec
PL1           3.00 dB
SFO1          400.1324710 MHz
```

```
F2 - Processing parameters
SI                16384
SF                400.1300092 MHz
WDW               no
SSB               0
LB               0.00 Hz
GB               0
PC               1.00
```

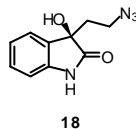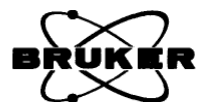

```
Current Data Parameters
NAME      Mar17-2009-hayashi
EXPNO      20
PROCNO     1
```

```

P2 - Acquisition Parameters
Date_      20090317
Time       13.41
INSTRUM    spect
PROBHD     5 mm PABBO BB-
PULPROG    zgpg30
TD         65536
NS          CDX13
SOLVENT    DMSO
DS          600
SWH         4
FIDRES     0.366798 Hz
AQ         1.363198 sec
RG         128
DE         20.800 usec
WE         6.00 usec
TE         302.9 K
D1         2.00000000 sec
d11        0.03000000 sec
DELTA      1.89999999 sec
TD0        1

```

```
===== CHANNEL f1 =====
NUC1          13C
P1             7.20 usec
PL1           -4.00 dB
SFO1         100.6354036 MHz
```

```

===== CHANNEL f2 =====
CPDFRG2          waltz16
NUC2              1H
PCPDF2           80.00 usec
PL2              -4.00 dB
PL12             15.00 dB
PL13             15.00 dB
SFO2            400.1816007 MHz

```

```
F2 - Processing parameters
SI                      32768
SF                      100.6253449 MHz
WDW                      EM
SSB                      0
LB                      1.00 Hz
GB                      0
PC                      1.40
```

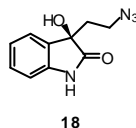

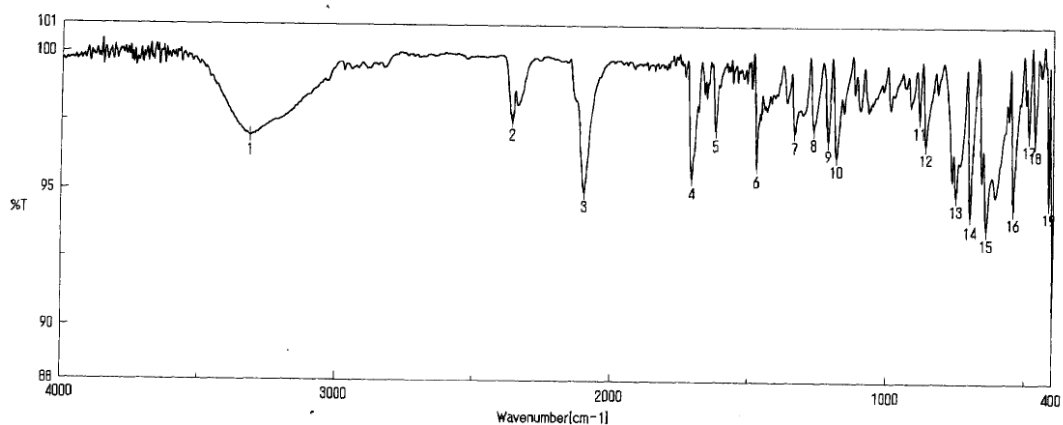

積算回数  
ゼロフィリング  
ゲイン  
日時  
測定者  
ファイル名  
サンプル名  
コメント

16  
ON  
2  
109/03/17 14:08  
Memory#3  
background

分解  
アポダイゼーション  
スキャンスピード

4 cm⁻¹  
Cosine  
2 mm/sec

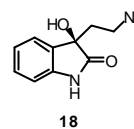

|                     |                      |                     |                     |
|---------------------|----------------------|---------------------|---------------------|
| 1: 3313.11, 96.9334 | 2: 2358.52, 97.5331  | 3: 2098.17, 94.9395 | 4: 1706.69, 95.4665 |
| 5: 1620.88, 97.1981 | 6: 1471.42, 95.8913  | 7: 1333.53, 97.1408 | 8: 1264.11, 97.2578 |
| 9: 1212.04, 96.8497 | 10: 1183.11, 96.2697 | 11: 886.13, 97.6965 | 12: 862.99, 96.7435 |
| 13: 753.07, 94.8580 | 14: 702.93, 94.0977  | 15: 643.14, 93.0280 | 16: 545.76, 94.3675 |
| 17: 488.87, 97.0911 | 18: 466.99, 96.8830  | 19: 417.51, 94.5644 |                     |

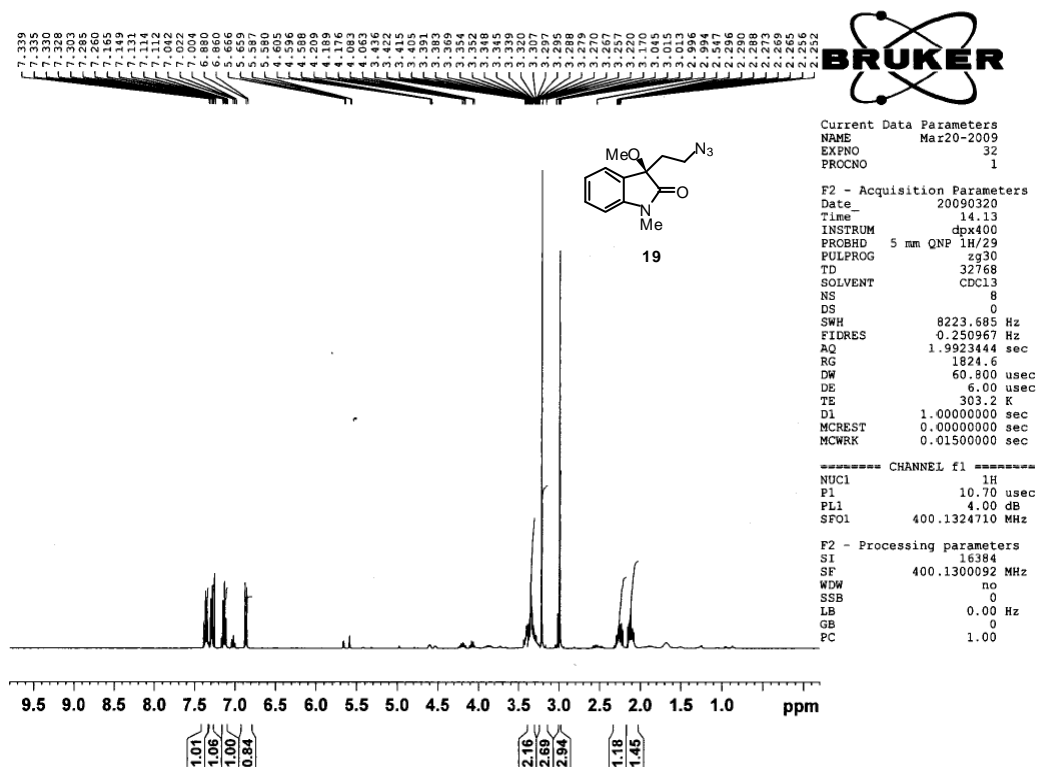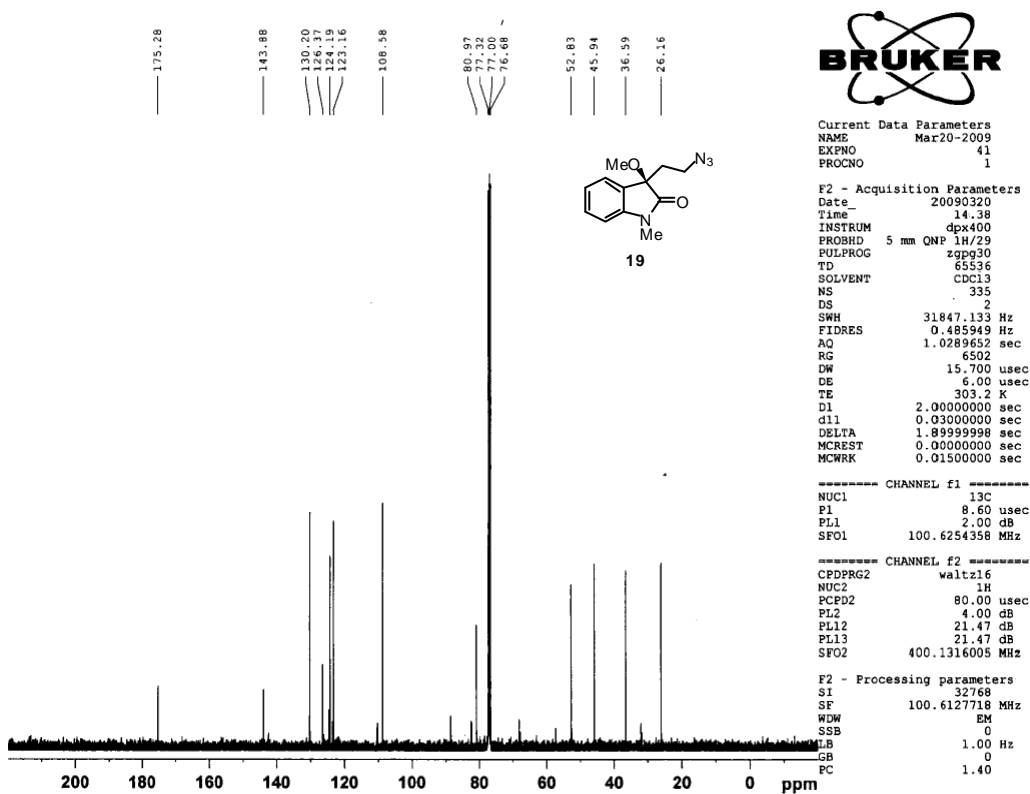

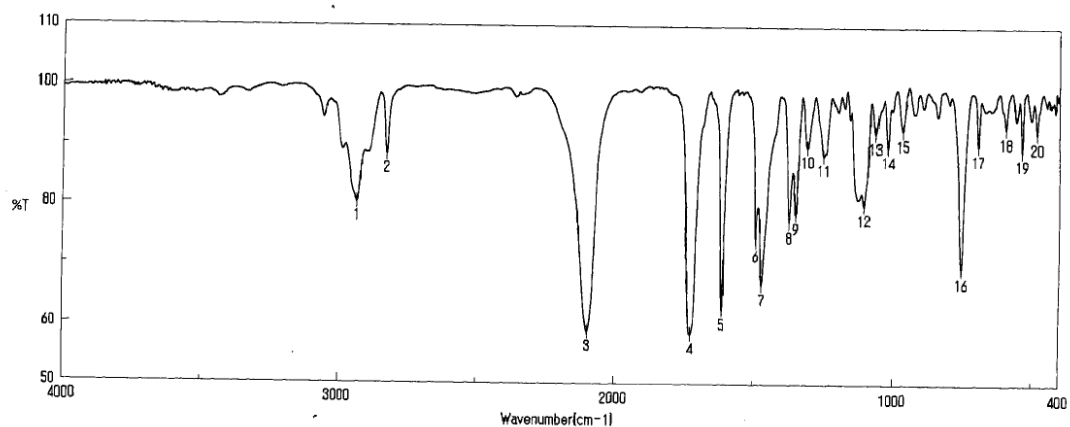

積算回数  
ゼロファイリング  
ゲイン  
日時  
測定者  
ファイル名  
サンプル名  
コメント

16  
ON  
1  
109/03/20 15:19  
Memory#3  
background

分解  
アポダイゼーション  
スキャンスピード

4 cm⁻¹  
Cosine  
2 mm/sec

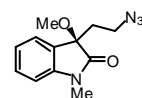

19

|                      |                      |                      |                      |
|----------------------|----------------------|----------------------|----------------------|
| 1: 2934.16, 80.4971  | 2: 2827.13, 88.5275  | 3: 2098.17, 58.8342  | 4: 1725.01, 58.4829  |
| 5: 1613.16, 62.5633  | 6: 1492.83, 74.0805  | 7: 1469.49, 66.7502  | 8: 1372.10, 77.2481  |
| 9: 1348.96, 78.6395  | 10: 1309.43, 89.9629 | 11: 1250.81, 88.5780 | 12: 1105.01, 80.1304 |
| 13: 1085.48, 92.3101 | 14: 1023.05, 89.9927 | 15: 970.02, 92.7781  | 16: 754.99, 89.5357  |
| 17: 698.11, 90.2584  | 18: 597.82, 93.1563  | 19: 538.04, 89.4276  | 20: 484.05, 92.3390  |

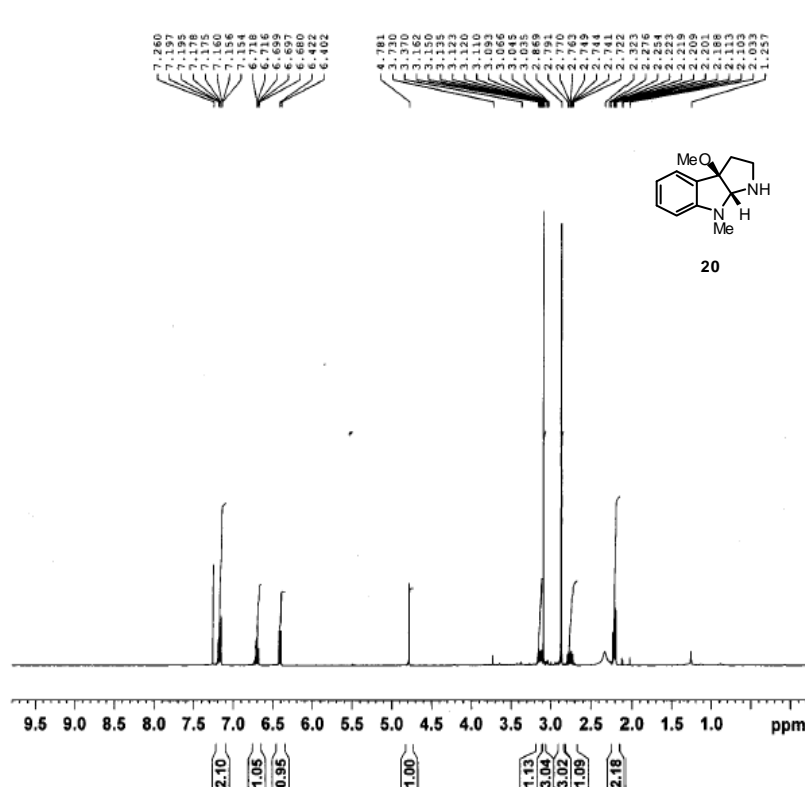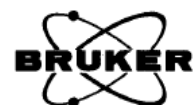

Current Data Parameters  
 NAME Apr16-2009  
 EXPNO 164  
 PROCNO 1

F2 - Acquisition Parameters  
 Date 20090416  
 Time 21.11  
 INSTRUM dpx400  
 PROBD 5 mm QNP 1H/29  
 PULPROG zg30  
 TD 32768  
 SOLVENT CDCl3  
 NS 8  
 DS 0  
 SWH 8223.695 Hz  
 FIDRES 0.250967 Hz  
 AQ 1.9923444 sec  
 RG 3649.1  
 DW 60.800 usec  
 DE 6.00 usec  
 TE 303.2 K  
 D1 1.00000000 sec  
 MCREST 0.00000000 sec  
 MCWKK 0.01500000 sec

===== CHANNEL f1 =====  
 NUC1 1H  
 P1 10.70 usec  
 PL1 4.00 dB  
 SFO1 400.1324710 MHz

F2 - Processing parameters  
 SI 16384  
 SF 400.1300092 MHz  
 WDW no  
 SSB 0  
 LB 0.00 Hz  
 GB 0  
 PC 1.00

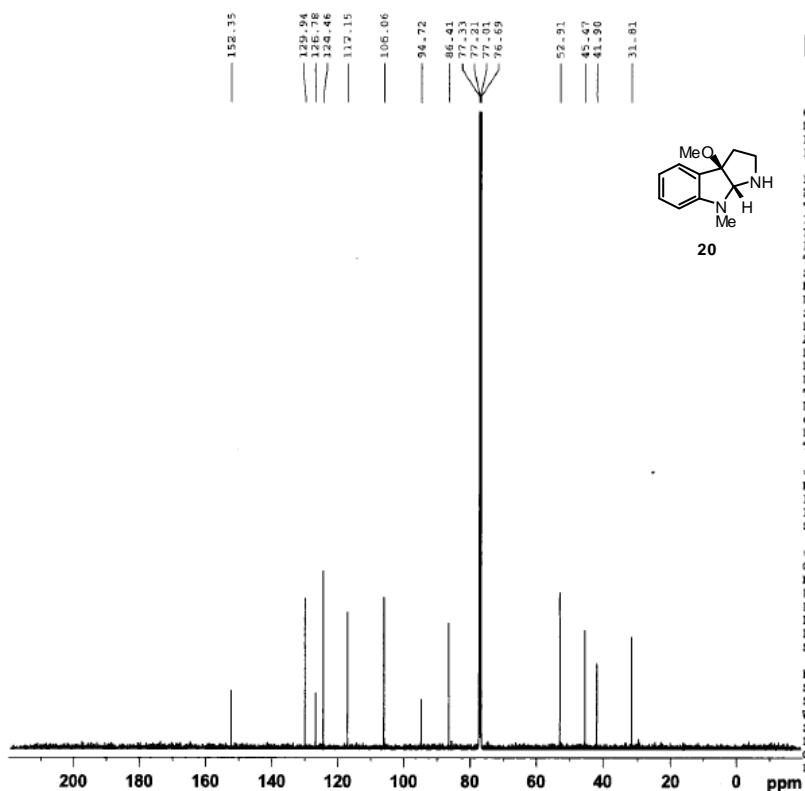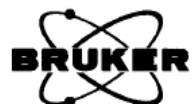

Current Data Parameters  
 NAME Apr16-2009-hayashi  
 EXPNO 70  
 PROCNO 1

F2 - Acquisition Parameters  
 Date 20090416  
 Time 22.16  
 INSTRUM spect  
 PROBD 5 mm PABBO DB-  
 PULPROG zgpg30  
 TD 65536  
 SOLVENT CDCl3  
 NS 1024  
 DS 4  
 SWH 24038.461 Hz  
 FIDRES 0.366798 Hz  
 AQ 1.3631988 sec  
 RG 203  
 DW 20.800 usec  
 DE 6.00 usec  
 TE 296.9 K  
 D1 2.00000000 sec  
 d11 0.03000000 sec  
 DELTA 1.89999998 sec  
 TD0 1

===== CHANNEL f1 =====  
 NUC1 13C  
 P1 7.20 usec  
 PL1 -3.50 dB  
 SFO1 100.6354036 MHz

===== CHANNEL f2 =====  
 CPDPRG2 waltz16  
 NUC2 1H  
 PCPD2 80.00 usec  
 PL2 -4.00 dB  
 PL12 14.50 dB  
 PL13 14.50 dB  
 SFO2 400.1816007 MHz

F2 - Processing parameters  
 SI 32768  
 SF 100.6253433 MHz  
 WDW EM  
 SSB 0  
 LB 1.00 Hz  
 GB 0  
 PC 1.40



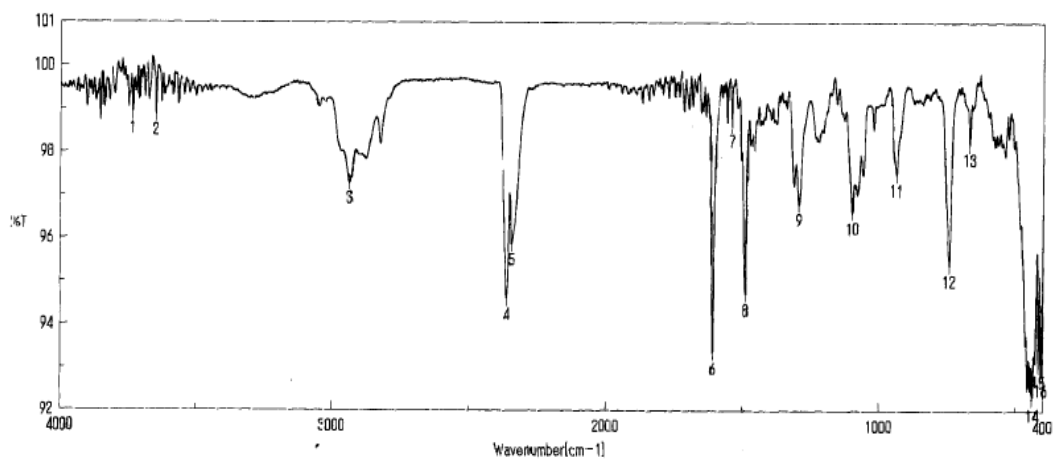

積算回数  
ゼロファイリング  
ゲイン  
日時  
測定者  
ファイル名  
サンプル名  
コメント

16  
ON  
2  
108/04/18 15:28  
Memory#3  
background

分解  
アポダイゼーション  
スキャンスピード

4 cm⁻¹  
Cosine  
2 mm/sec

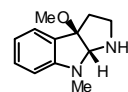

20

|                     |                      |                     |                     |
|---------------------|----------------------|---------------------|---------------------|
| 1: 3734.48, 98.0191 | 2: 3548.66, 98.8743  | 3: 2937.08, 97.3080 | 4: 2360.44, 94.6147 |
| 5: 2341.15, 95.8702 | 6: 1809.31, 93.3449  | 7: 1540.85, 96.6429 | 8: 1490.70, 94.7051 |
| 9: 1294.00, 96.8044 | 10: 1089.23, 96.5995 | 11: 938.20, 97.4886 | 12: 743.42, 95.3726 |
| 13: 669.18, 98.2113 | 14: 437.76, 92.2808  | 15: 418.55, 93.0498 | 16: 408.91, 92.8490 |

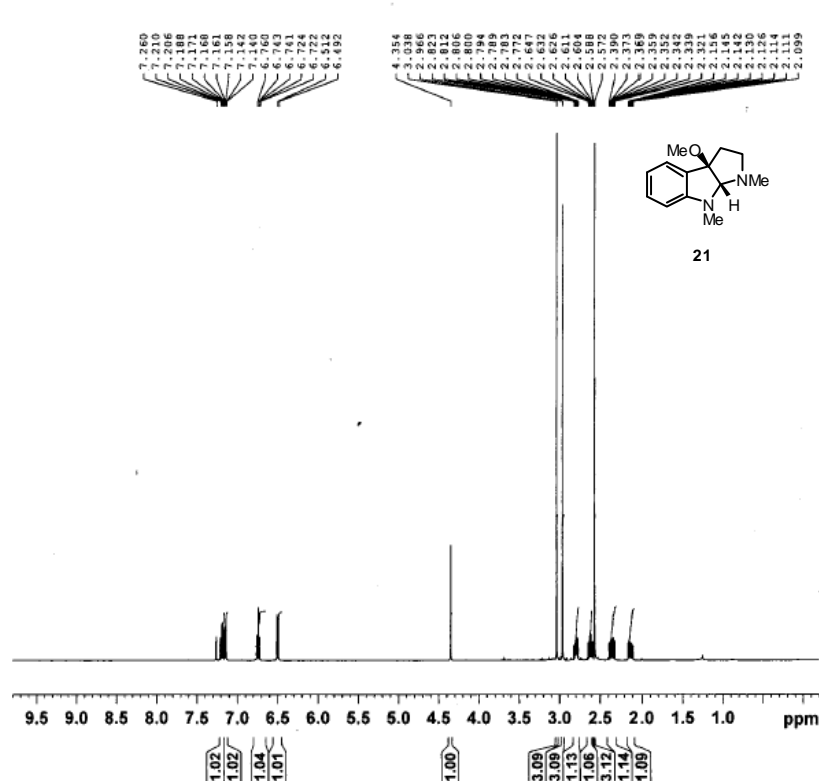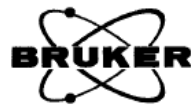

Current Data Parameters  
 NAME Apr22-2009  
 EXPNO 12  
 PROCNO 1

F2 - Acquisition Parameters  
 Date\_ 20090422  
 Time\_ 10.05  
 INSTRUM dpx400  
 PROBHD 5 mm QNP 1H/29  
 PULPROG zg30  
 TD 32768  
 SOLVENT CDCl3  
 NS 8  
 DS 0  
 SWH 8223.685 Hz  
 FIDRES 0.250967 Hz  
 AQ 1.9923444 sec  
 RG 1448.2  
 DW 60.800 usec  
 DE 6.00 usec  
 TE 303.2 K  
 D1 1.00000000 sec  
 MCREST 0.00000000 sec  
 MCWRR 0.01500000 sec

===== CHANNEL f1 =====  
 NUC1 1H  
 P1 10.70 usec  
 PL1 4.00 dB  
 SFO1 400.1324710 MHz

F2 - Processing parameters  
 SI 16384  
 SF 400.1300092 MHz  
 WDW no  
 SSB 0  
 LB 0.00 Hz  
 GB 0  
 PC 1.00

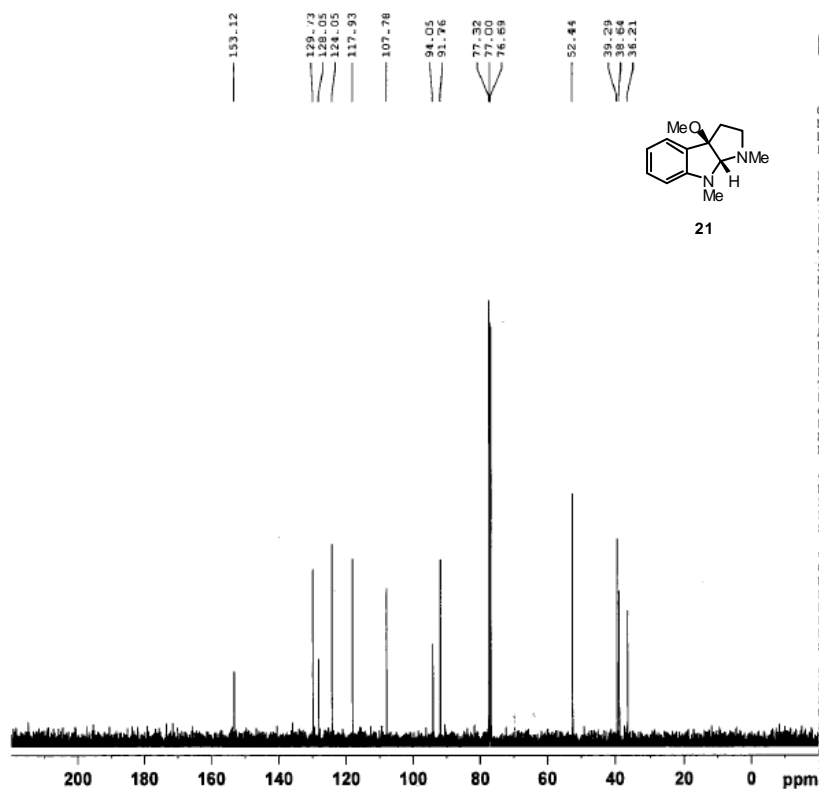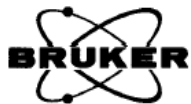

Current Data Parameters  
 NAME Apr22-2009  
 EXPNO 21  
 PROCNO 1

F2 - Acquisition Parameters  
 Date\_ 20090422  
 Time\_ 10.19  
 INSTRUM dpx400  
 PROBHD 5 mm QNP 1H/29  
 PULPROG zgpg30  
 TD 65536  
 SOLVENT CDCl3  
 NS 64  
 DS 2  
 SWH 31847.133 Hz  
 FIDRES 0.485949 Hz  
 AQ 1.0289652 sec  
 RG 7298.2  
 DW 15.700 usec  
 DE 6.00 usec  
 TE 303.2 K  
 D1 2.00000000 sec  
 d11 0.03000000 sec  
 DELTA 1.89999998 sec  
 MCREST 0.00000000 sec  
 MCWRR 0.01500000 sec

===== CHANNEL f1 =====  
 NUC1 13C  
 P1 8.60 usec  
 PL1 2.00 dB  
 SFO1 100.6254358 MHz

===== CHANNEL f2 =====  
 CPDPRG2 waltz16  
 NUC2 1H  
 FCPD2 80.00 usec  
 PL2 4.00 dB  
 PL12 21.47 dB  
 PL13 21.47 dB  
 SFO2 400.1316005 MHz

F2 - Processing parameters  
 SI 32768  
 SF 100.6127718 MHz  
 WDW EM  
 SSB 0  
 LB 1.00 Hz  
 GB 0  
 PC 1.40

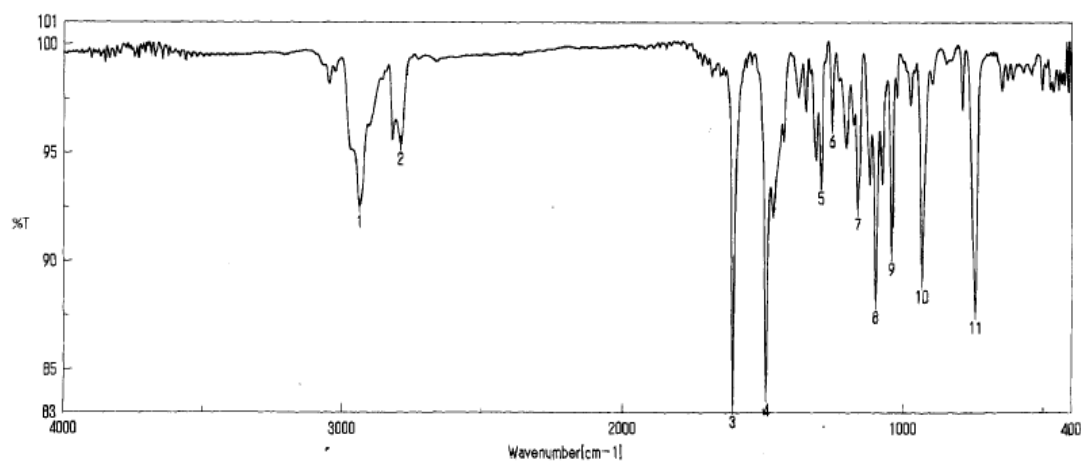

積算回数  
ゼロフィリング  
ゲイン  
日時  
測定者  
ファイル名  
サンプル名  
コメント

32  
ON  
1  
108/04/24 10:15  
Memory#3  
background

分解  
アポダイゼーション  
スキャンスピード

4 cm⁻¹  
Oxline  
2 mm/sec

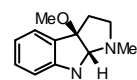

21

|                     |                     |                     |                     |
|---------------------|---------------------|---------------------|---------------------|
| 1: 2938.02, 92.5473 | 2: 2791.46, 95.4216 | 3: 1608.34, 83.3025 | 4: 1489.74, 83.8498 |
| 5: 1294.00, 93.6511 | 6: 1254.47, 96.2809 | 7: 1162.87, 92.4345 | 8: 1088.26, 88.1443 |
| 9: 1041.37, 90.3837 | 10: 933.38, 89.0991 | 11: 742.46, 87.6738 |                     |
